# Supplementary material
Source: PubMed Central journal article supplement (PMC11620755)
Supplement: NIHMS2037101-supplement-Supporting_Information.pdf [file NIHMS2037101-supplement-Supporting_Information.pdf]

## Supporting Information for

### Mechanism of Ni-catalyzed Oxidations of Unactivated C(sp<sup>3</sup>)-H Bonds

Yehao Qiu and John F. Hartwig\*

Department of Chemistry, University of California, Berkeley, California 94720, United States

jhartwig@berkeley.edu

#### Table of Contents

|                                                                                                                                        |     |
|----------------------------------------------------------------------------------------------------------------------------------------|-----|
| 1. General Procedures .....                                                                                                            | S3  |
| 2. Synthesis and Characterization of Ni Complexes <b>1a-1h</b> .....                                                                   | S3  |
| 2.1 Synthesis of Ni(Me <sub>4</sub> Phen) <sub>2</sub> Cl <sub>2</sub> ( <b>1a</b> ) .....                                             | S3  |
| 2.2 Synthesis of Ni(bpy) <sub>2</sub> Cl <sub>2</sub> ( <b>1b</b> ) .....                                                              | S4  |
| 2.3 Synthesis of Ni(Brbpy) <sub>2</sub> Cl <sub>2</sub> ( <b>1f</b> ) .....                                                            | S5  |
| 2.4 Synthesis of Ni(bpyPY2Me)Cl <sub>2</sub> ( <b>1g</b> ) .....                                                                       | S5  |
| 2.5 Synthesis of Ni(Me <sub>2</sub> Phen) <sub>2</sub> (OAc)(BPh <sub>4</sub> ) ( <b>1h</b> ) .....                                    | S6  |
| 3. Ni-catalyzed Oxidation of Cyclohexane ( <b>2</b> ) .....                                                                            | S8  |
| 3.1. General procedure for Ni-catalyzed oxidation of <b>2</b> by <i>m</i> CPBA .....                                                   | S8  |
| 3.2. Results of transition metal catalyzed oxidation of <b>2</b> .....                                                                 | S9  |
| 3.3. Time courses of Ni-catalyzed oxidation of <b>2</b> .....                                                                          | S10 |
| 4. Ni-catalyzed Oxidation of Adamantane ( <b>3</b> ) .....                                                                             | S10 |
| 4.1. General procedure for Ni-catalyzed oxidation of <b>3</b> by <i>m</i> CPBA .....                                                   | S10 |
| 4.2. Results of transition metal catalyzed oxidation of <b>3</b> .....                                                                 | S11 |
| 5. Ni-catalyzed Oxidation of Adamantane in the Presence of CCl <sub>4</sub> .....                                                      | S13 |
| 6. Ni-catalyzed Oxidation of <i>cis</i> - and <i>trans</i> -1,2-Dimethylcyclohexane ( <i>cis</i> - and <i>trans</i> - <b>6</b> ) ..... | S13 |
| 6.1. General procedure for Ni-catalyzed oxidation of <i>cis</i> - or <i>trans</i> - <b>6</b> by <i>m</i> CPBA .....                    | S13 |
| 6.2. Results of Ni-catalyzed oxidation of <i>cis</i> - <b>6</b> .....                                                                  | S14 |
| 6.3. Results of Ni-catalyzed oxidation of <i>trans</i> - <b>6</b> .....                                                                | S15 |
| 7. Ni-catalyzed Decomposition of <i>m</i> CPBA .....                                                                                   | S16 |
| 7.1. Time courses of Ni-catalyzed decomposition of <i>m</i> CPBA .....                                                                 | S17 |
| 8. EPR Spectra of Stoichiometric Reactions of Ni Complex <b>1a</b> .....                                                               | S18 |

|       |                                                                                                  |     |
|-------|--------------------------------------------------------------------------------------------------|-----|
| 9.    | Photo-mediated Oxidation of Adamantane ( <b>3</b> ) by Benzil and Oxygen .....                   | S19 |
| 10.   | Ni-catalyzed Oxidation of Cyclohexane- <i>d</i> <sub>12</sub> ( <b>2-d</b> <sub>12</sub> ) ..... | S20 |
| 9.1.  | Hydrogen atom transfer (HAT) from solvent molecules to 3-chlorophenyl radical ( <b>12</b> )....  | S22 |
| 11.   | Bromination of 2,2,4,4-Tetramethylpentane ( <b>16</b> ).....                                     | S24 |
| 10.1. | General procedure for Ni-catalyzed bromination of <b>16</b> by <i>m</i> CPBA .....               | S24 |
| 10.2. | Synthesis of Bis(3-chlorobenzoyl)peroxide ( <b>15</b> ).....                                     | S25 |
| 10.3. | General procedure for bromination of <b>16</b> by peroxide <b>15</b> .....                       | S26 |
| 10.4. | Synthesis of 3,5-bis(trifluoromethyl)perbenzoic acid ( <b>18</b> ) .....                         | S28 |
| 10.5. | General procedure for Ni-catalyzed bromination of <b>16</b> by peracid <b>18</b> .....           | S29 |
| 10.6. | Results and discussions .....                                                                    | S30 |
| 12.   | Assay for the Alkylperoxy Intermediate by GC.....                                                | S33 |
| 11.1. | General procedure for the assay for alkylperoxy intermediates by GC.....                         | S33 |
| 11.2. | Results and derivation of the percentage of alkylperoxy intermediate <b>19</b> .....             | S34 |
| 13.   | References .....                                                                                 | S36 |
| 14.   | X-ray Crystallographic Data .....                                                                | S36 |
| 13.1. | Ni(Me <sub>4</sub> Phen) <sub>2</sub> Cl <sub>2</sub> ( <b>1a</b> ) .....                        | S36 |
| 13.2. | Ni(Brbpy) <sub>2</sub> Cl <sub>2</sub> ( <b>1f</b> ) .....                                       | S48 |
| 13.3. | Ni(bpyPY2Me)Cl <sub>2</sub> ( <b>1g</b> ).....                                                   | S55 |
| 13.4. | Ni(Me <sub>2</sub> Phen) <sub>2</sub> (OAc)(BPh <sub>4</sub> ) ( <b>1h</b> ).....                | S67 |

## 1. General Procedures

Unless otherwise specified, all reactions were performed in oven-dried glassware under air. Reagents and solvents were used as received from commercial sources without further purification. Reaction temperatures refer to the temperatures of aluminum heating blocks or silicone oil baths.  $^1\text{H}$  and  $^2\text{H}$  NMR spectra were obtained on Bruker AV and NEO spectrometers operating at 300, 500, 600, or 700 MHz. Chemical shifts ( $\delta$ ) were reported relative to the residual solvent signal ( $\delta$  7.26 for  $\text{CDCl}_3$ ,  $\delta$  1.94 for  $\text{CD}_3\text{CN}$ ). Infrared (IR) spectra were obtained on a Bruker Vertex 80 spectrometer and were reported in frequency of absorption ( $\text{cm}^{-1}$ ). Electrospray ionization high-resolution mass spectra (ESI HRMS) were obtained on a PerkinElmer AxION 2 TOF mass spectrometer. Low-temperature X-band EPR spectra were recorded using a Varian E109 EPR spectrometer equipped with a Model 102 Microwave bridge. Sample temperature was maintained at 8K using an Air Products LTR liquid helium cryostat. The following spectrometer conditions were used: microwave frequency, 9.22 GHz; field modulation amplitude, 32 G at 100 kHz; microwave power, 2 mW. X-ray diffraction data were obtained at the Small Molecule X-ray Crystallography Facility (CheXray) at the University of California, Berkeley. Elemental analyses were performed by the Microanalytical Facility at University of California, Berkeley.

## 2. Synthesis and Characterization of Ni Complexes **1a-1h**

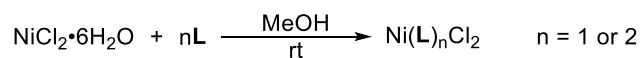

Complexes **1c-1e** were synthesized according to reported literature.<sup>1-2</sup>

### 2.1 Synthesis of $\text{Ni}(\text{Me}_4\text{Phen})_2\text{Cl}_2$ (**1a**)

To a round bottom flask equipped with a stir bar was charged  $\text{NiCl}_2 \cdot 6\text{H}_2\text{O}$  (118.8 mg, 0.5000 mmol), 3,4,7,8-tetramethyl-1,10-phenanthroline ( $\text{Me}_4\text{Phen}$ , **L1**, 236.3 mg, 1.000 mmol), and methanol (10.0 mL). The resulting dark red solution was stirred at room temperature for 3 h. Acetonitrile (5.0 mL) was added, and the solvent was evaporated *in vacuo*. The remaining solid was washed twice with acetonitrile and

subsequently dried under high vacuum overnight. Product **1a** was collected as a blue-green powder (150.9 mg, 50.11% yield). Vapor diffusion of diethyl ether into a saturated solution of **1a** in methanol/acetonitrile afforded crystals suitable for X-ray analysis.

IR (neat,  $\text{cm}^{-1}$ ): 3296, 1617, 1525, 1428, 1385, 1245, 1180, 1015, 946, 915, 888, 864, 824, 730, 620, 572, 554, 525, 467. ESI HRMS ( $m/z$ , amu):  $[\text{Ni}(\text{Me}_4\text{Phen})_2]^{2+}$ : calculated 265.0985, found 265.0933;  $[\text{Ni}(\text{Me}_4\text{Phen})_2\text{Cl}]^+$ : calculated 565.1663, found 565.1589.

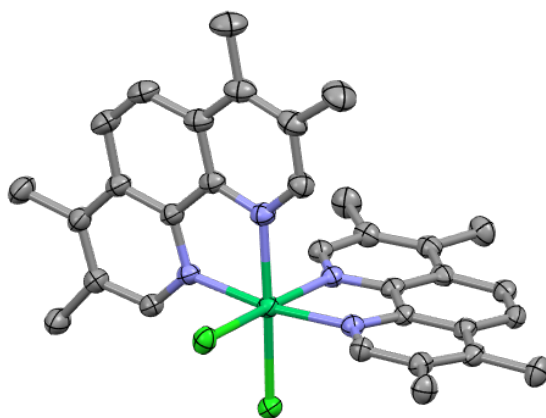

**Figure S1.** X-ray crystal structure of complex **1a**. Hydrogen atoms are omitted for clarity.

## 2.2 Synthesis of $\text{Ni}(\text{bpy})_2\text{Cl}_2$ (**1b**)

To a round-bottom flask equipped with a stir bar was charged  $\text{NiCl}_2 \cdot 6\text{H}_2\text{O}$  (47.5 mg, 0.200 mmol), 2,2'-bipyridine (bpy, **L2**, 62.5 mg, 0.400 mmol), and methanol (2.0 mL). The reaction mixture was stirred at room temperature for 100 min. During the course of the reaction, the solution turned from pink to dark blue. Acetonitrile (3.0 mL) was added, and the solvent was evaporated *in vacuo*. The remaining solid was washed twice with acetonitrile and subsequently dried under high vacuum overnight. Product **1b** was collected as a blue-green powder.

IR (neat,  $\text{cm}^{-1}$ ): 3429, 3026, 1599, 1565, 1493, 1473, 1440, 1314, 1249, 1172, 1153, 1104, 1057, 1041, 1020, 917, 770, 736, 652, 631, 530, 439, 420. ESI HRMS ( $m/z$ , amu):  $[\text{Ni}(\text{bpy})_2]^{2+}$ : calculated 185.0359,

found 185.0264;  $[\text{Ni}(\text{bpy})_2\text{Cl}]^+$ : calculated 405.0411, found 405.0228. Elemental analysis (%): calculated for  $\text{C}_{22}\text{H}_{24}\text{Cl}_2\text{N}_4\text{NiO}_2$  (**1b**·2MeOH): C 52.22, H 4.78, N, 11.07; found: C 52.41, H 4.60, N 11.39.

### 2.3 Synthesis of $\text{Ni}(\text{Brbpy})_2\text{Cl}_2$ (**1f**)

To a round-bottom flask equipped with a stir bar was charged  $\text{NiCl}_2 \cdot 6\text{H}_2\text{O}$  (23.8 mg, 0.100 mmol), 6-bromo-2,2'-bipyridine (Brbpy, **L6**, 47.0 mg, 0.200 mmol), and methanol (2.0 mL). The blue-green solution was stirred at room temperature for 80 min. The solvent was then evaporated *in vacuo*. The remaining solid was washed twice with acetonitrile and subsequently dried under high vacuum. Product **1f** was collected as a green powder (44 mg, 73% yield). Vapor diffusion of diethyl ether into a saturated solution of **1f** in methanol/acetonitrile afforded crystals suitable for X-ray analysis.

IR (neat,  $\text{cm}^{-1}$ ): 3063, 1653, 1602, 1587, 1571, 1554, 1484, 1451, 1427, 1393, 1293, 1262, 1230, 1186, 1161, 1131, 1115, 1102, 1077, 1021, 995, 917, 817, 788, 770, 731, 685, 645, 634, 600. ESI HRMS ( $m/z$ , amu):  $[\text{Ni}(\text{Brbpy})_2\text{Cl}]^+$ : calculated 562.8601, found 562.8567. Elemental analysis (%): calculated for  $\text{C}_{20}\text{H}_{14}\text{Br}_2\text{Cl}_2\text{N}_4\text{Ni}$ : C 40.05, H 2.35, N 9.34; found: C 39.83, H 2.06, N 9.03.

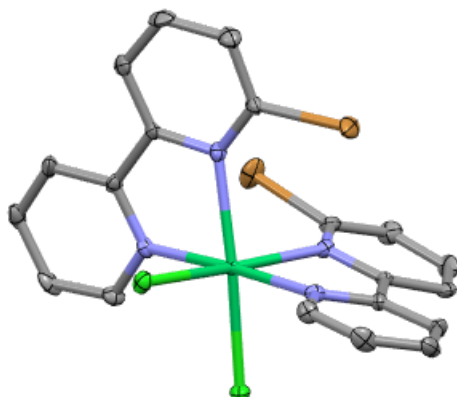

**Figure S2.** X-ray crystal structure of complex **1f**. Hydrogen atoms are omitted for clarity.

### 2.4 Synthesis of $\text{Ni}(\text{bpyPY2Me})\text{Cl}_2$ (**1g**)

The ligand bpyPY2Me (**L7**) was synthesized based on reported literature.<sup>3</sup>

To a round-bottom flask equipped with a stir bar was charged  $\text{NiCl}_2 \cdot 6\text{H}_2\text{O}$  (118.8 mg, 0.5000 mmol), ligand **L7** (169.2 mg, 0.5000 mmol), and a mixture of acetonitrile and methanol (10.0 mL). The clear brown solution was stirred at room temperature for 1 h. The solution was then concentrated *in vacuo* until precipitate formed. The precipitate was collected by filtration, washed with acetonitrile, and subsequently dried under high vacuum. Product **1g** was obtained as a gray-green powder (84 mg, 36% yield). Vapor diffusion of diethyl ether into a saturated solution of **1g** in methanol/acetonitrile afforded crystals suitable for X-ray analysis.

IR (neat,  $\text{cm}^{-1}$ ): 3066, 1593, 1566, 1471, 1452, 1408, 1389, 1329, 1303, 1287, 1257, 1160, 1117, 1104, 1076, 1051, 1024, 1014, 972, 905, 885, 870, 853, 811, 804, 780, 765, 756, 748, 707, 662, 639, 591, 570, 509, 494, 475, 436, 415. ESI HRMS ( $m/z$ , amu):  $[\text{Ni}(\text{L7})\text{Cl}]^+$ : calculated 431.0568, found 431.7147. Elemental analysis (%): calculated for  $\text{C}_{24}\text{H}_{26}\text{Cl}_2\text{N}_4\text{NiO}_2$  (**1g**·2MeOH): C 54.18, H 4.93, N 10.53; found: C 53.84, H 4.85, N 10.36.

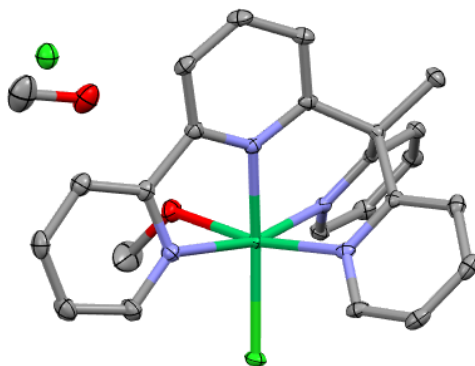

**Figure S3.** X-ray crystal structure of complex **1g**·2MeOH. Hydrogen atoms are omitted for clarity.

### 2.5 Synthesis of $\text{Ni}(\text{Me}_2\text{Phen})_2(\text{OAc})(\text{BPh}_4)$ (**1h**)

To a round bottom flask equipped with a stir bar was added  $\text{Ni}(\text{OAc})_2 \cdot 4\text{H}_2\text{O}$  (29.9 mg, 0.120 mmol) and methanol (3 mL). Then 2,9-dimethyl-1,10-phenanthroline ( $\text{Me}_2\text{Phen}$ , **L8**, 50.0 mg, 0.240 mmol), dissolved in 2 mL methanol, was added slowly and the reaction mixture was stirred at room temperature for 2 h.  $\text{NaBPh}_4$  (41.1 mg, 0.120 mmol) was then added in one portion and the reaction mixture was stirred at room

temperature overnight. The resulting light blue precipitate was collected by filtration, washed with water, methanol and hexanes, then redissolved in DCM and filtered with a syringe filter. The filtrate was concentrated to ~ 2 mL and added dropwise to a 100 mL mixture of diethyl ether and hexanes (1:1 v/v). The resulting precipitate was collected by filtration and dried under high vacuum overnight. Product **1h** was obtained as a pale blue powder (47.5 mg, 46% yield). Vapor diffusion of diethyl ether into a concentrated solution of complex **1h** in DCM afforded crystals suitable for X-ray analysis.

IR (neat,  $\text{cm}^{-1}$ ): 3054, 1594, 1543, 1499, 1453, 1425, 1380, 1293, 1154, 1032, 939, 855, 814, 775, 732, 704, 679, 656, 624, 612, 551, 468, 437, 408. ESI HRMS ( $m/z$ , amu):  $[\text{Ni}(\text{L8})_2(\text{OAc})]^+$ : calculated 533.1482, found 533.1277. Elemental analysis (%): calculated for  $\text{C}_{55}\text{H}_{51}\text{BN}_4\text{NiO}_3$  (**1h**·MeOH): C 74.60, H 5.81, N 6.33; found: C 74.44, H 5.84, N 6.26.

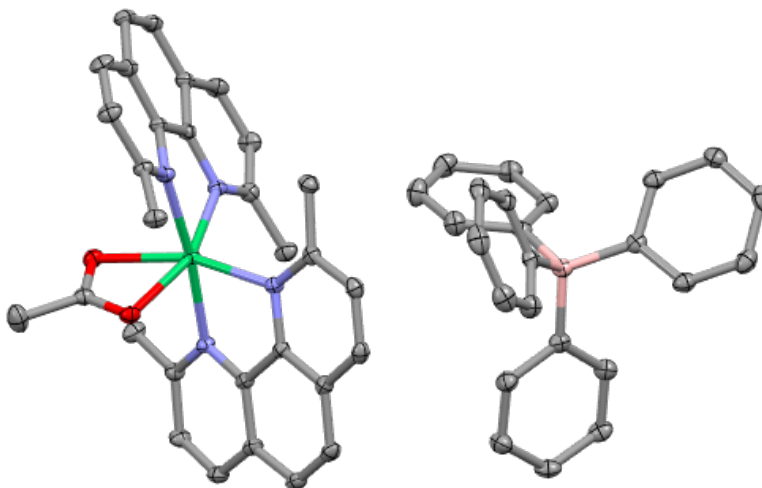

**Figure S4.** X-ray crystal structure of complex **1h**. Hydrogen atoms and DCM molecules are omitted for clarity.

### 3. Ni-catalyzed Oxidation of Cyclohexane (**2**)

#### 3.1. General procedure for Ni-catalyzed oxidation of **2** by *m*CPBA

To a 4 mL vial equipped with a stir bar was added *m*CPBA (28.8 mg, 0.125 mmol, ~75% purity), alkane **2** (7.50 equiv), and a mixture of dichloromethane and acetonitrile (3:1 v/v, 1.0 mL) as solvent. Ni complexes **1a-1h** were added as stock solutions or suspensions in DCM. NiCl<sub>2</sub> and CoCl<sub>2</sub> were added as stock solutions in a mixture of methanol-*d*<sub>4</sub> and acetonitrile (1:9 v/v). Methanol-*d*<sub>4</sub> was used to avoid overlapping of peaks with product **4a** in the <sup>1</sup>H NMR spectra. The vial was sealed, and the reaction mixture was stirred at 50 °C. The reaction was monitored by <sup>1</sup>H NMR spectroscopy until greater than 90% conversion of *m*CPBA was achieved. After cooling to room temperature, dibromomethane (4.4 μL, 0.50 equiv) was added as an internal standard. An aliquot (~ 30 μL) of the mixture was taken, diluted with chloroform-*d*<sub>1</sub>, and subjected to analysis by <sup>1</sup>H NMR spectroscopy.

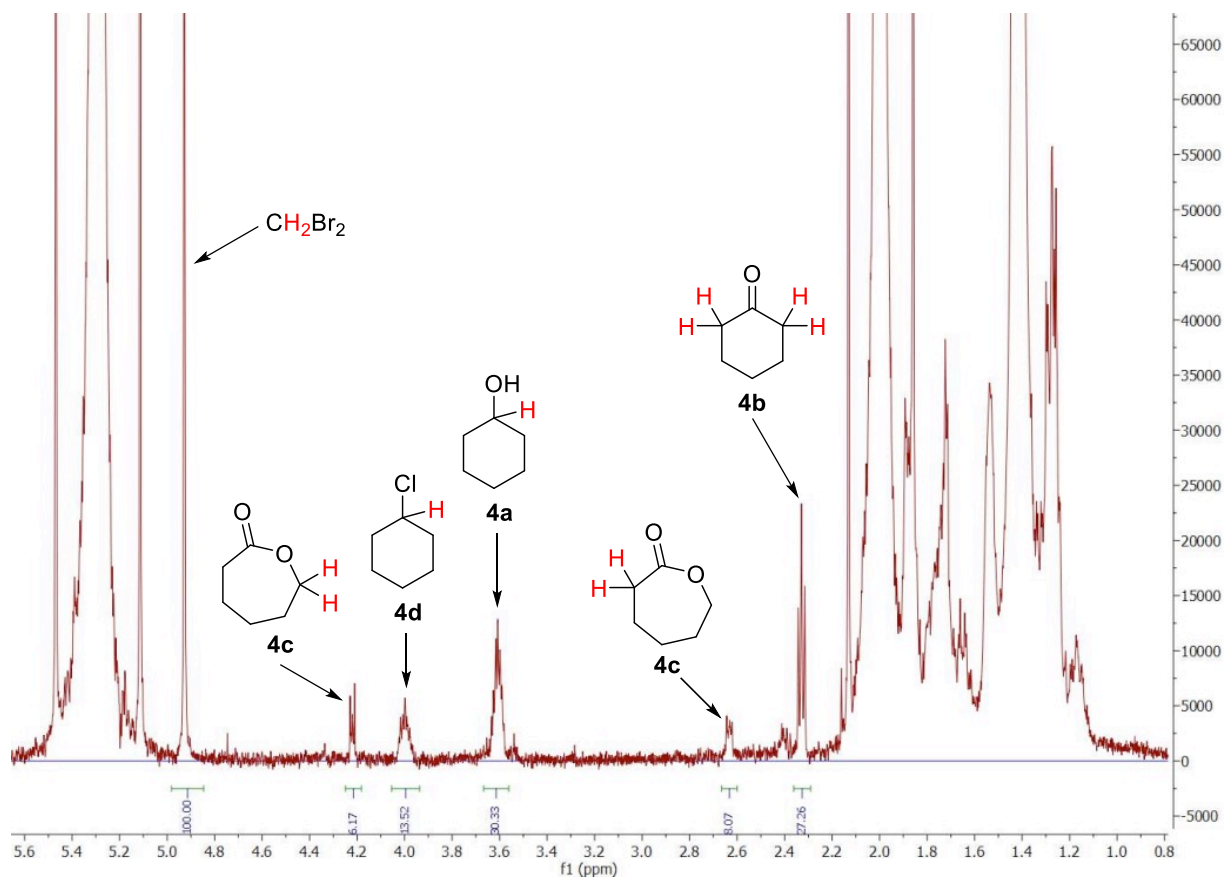

**Figure S5.** A typical <sup>1</sup>H NMR spectrum of the reaction mixture from the Ni-catalyzed oxidation of **2**.



### 3.2. Results of transition metal catalyzed oxidation of **2**

**Table S1. Results of oxidation of cyclohexane in the presence of different catalysts**

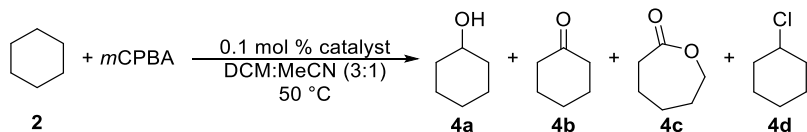

| Entry | Catalyst                                                                      | Time (h) | <b>4a</b> (%) | <b>4b</b> (%) | <b>4c</b> (%) | <b>4d</b> (%) | Conversion of <i>m</i> CPBA (%) |
|-------|-------------------------------------------------------------------------------|----------|---------------|---------------|---------------|---------------|---------------------------------|
| 1     | Ni(Me <sub>4</sub> Phen) <sub>2</sub> Cl <sub>2</sub><br><b>(1a)</b>          | 1        | 27.6          | 10.7          | 0             | 14.3          | 100                             |
| 2     |                                                                               |          | 34.1          | 10.7          | 0             | 15.0          | 100                             |
| 3     |                                                                               |          | 39.6          | 11.3          | 0             | 9.2           | 100                             |
| 4     | Ni(bpy) <sub>2</sub> Cl <sub>2</sub><br><b>(1b)</b>                           | 1        | 36.0          | 9.4           | 2.0           | 13.8          | 100                             |
| 5     |                                                                               |          | 37.3          | 10.0          | 1.4           | 12.2          | 100                             |
| 6     |                                                                               |          | 40.9          | 11.4          | 0             | 8.2           | 100                             |
| 7     | Ni(box) <sub>3</sub> (BPh <sub>4</sub> ) <sub>2</sub><br><b>(1c)</b>          | 1        | 37.9          | 9.9           | 1.1           | 15.0          | 100                             |
| 8     |                                                                               |          | 38.0          | 10.2          | 0             | 13.1          | 100                             |
| 9     |                                                                               |          | 41.5          | 11.1          | 2.0           | 9.2           | 100                             |
| 10    | Ni(tBubpy) <sub>3</sub> (BPh <sub>4</sub> ) <sub>2</sub><br><b>(1d)</b>       | 1.5      | 30.1          | 6.0           | 3.4           | 7.8           | 96                              |
| 11    |                                                                               |          | 33.1          | 6.8           | 3.1           | 9.2           | 96                              |
| 12    |                                                                               |          | 30.1          | 6.0           | 3.4           | 7.8           | 96                              |
| 13    | Ni(TPA)(H <sub>2</sub> O)(OAc)(BPh <sub>4</sub> )<br><b>(1e)</b>              | 1.5      | 33.6          | 9.6           | 1.5           | 16.5          | 100                             |
| 14    |                                                                               |          | 30.3          | 6.8           | 3.6           | 13.5          | 100                             |
| 15    |                                                                               |          | 34.8          | 8.6           | 1.2           | 8.9           | 100                             |
| 16    | Ni(Brbpy) <sub>2</sub> Cl <sub>2</sub><br><b>(1f)</b>                         | 2        | 32.5          | 6.0           | 4.1           | 11.2          | 100                             |
| 17    |                                                                               |          | 36.1          | 4.8           | 5.5           | 8.6           | 90                              |
| 18    |                                                                               |          | 35.1          | 4.8           | 4.7           | 8.6           | 85                              |
| 19    | Ni(bpyPY2Me)Cl <sub>2</sub><br><b>(1g)</b>                                    | 3        | 32.0          | 5.7           | 5.0           | 10.4          | 96                              |
| 20    |                                                                               |          | 33.1          | 3.1           | 6.3           | 10.2          | 94                              |
| 21    |                                                                               |          | 36.1          | 5.4           | 4.9           | 11.2          | 96                              |
| 22    | Ni(Me <sub>2</sub> Phen) <sub>2</sub> (OAc)(BPh <sub>4</sub> )<br><b>(1h)</b> | 4        | 8.7           | 2.7           | 5.0           | 5.7           | 31                              |
| 23    |                                                                               |          | 8.6           | 2.0           | 4.9           | 4.8           | 36                              |
| 24    |                                                                               |          | 12.6          | 2.3           | 5.5           | 7.0           | 45                              |
| 25    | NiCl <sub>2</sub>                                                             | 4        | 31.8          | 6.6           | 6.5           | 10.5          | 100                             |
| 26    |                                                                               |          | 30.2          | 8.5           | 3.5           | 8.9           | 100                             |
| 27    |                                                                               |          | 30.0          | 9.8           | 3.2           | 9.7           | 100                             |
| 28    | CoCl <sub>2</sub>                                                             | 1.5      | 21.7          | 11.0          | 0             | 9.6           | 100                             |
| 29    |                                                                               |          | 30.6          | 10.2          | 0             | 8.0           | 100                             |
| 30    |                                                                               |          | 21.9          | 10.9          | 0             | 9.7           | 100                             |
| 31    | none                                                                          | 4        | 0             | 0             | 0             | 0             | 0                               |
| 32    |                                                                               |          | 0             | 0             | 0             | 0             | 0                               |
| 33    |                                                                               |          | 3.8           | 2.6           | 1.9           | 0             | < 10                            |

### 3.3. Time courses of Ni-catalyzed oxidation of **2**

To a 4 mL vial equipped with a stir bar was added *m*CPBA (28.8 mg, 0.125 mmol, ~75% purity), alkane **2** (7.50 equiv), dibromomethane (4.4  $\mu$ L, 0.50 equiv) as the internal standard and chloroform-*d*<sub>1</sub> (3:1 v/v, 1.0 mL) as solvent. Ni complexes **1a** and **1h** were added as stock solutions or suspensions in CDCl<sub>3</sub>. The vial was capped, and the reaction mixture was stirred at 50 °C. Aliquots (~ 15  $\mu$ L) were periodically taken from the reaction mixture, diluted with chloroform-*d*<sub>1</sub>, and subjected to analysis by <sup>1</sup>H NMR spectroscopy.

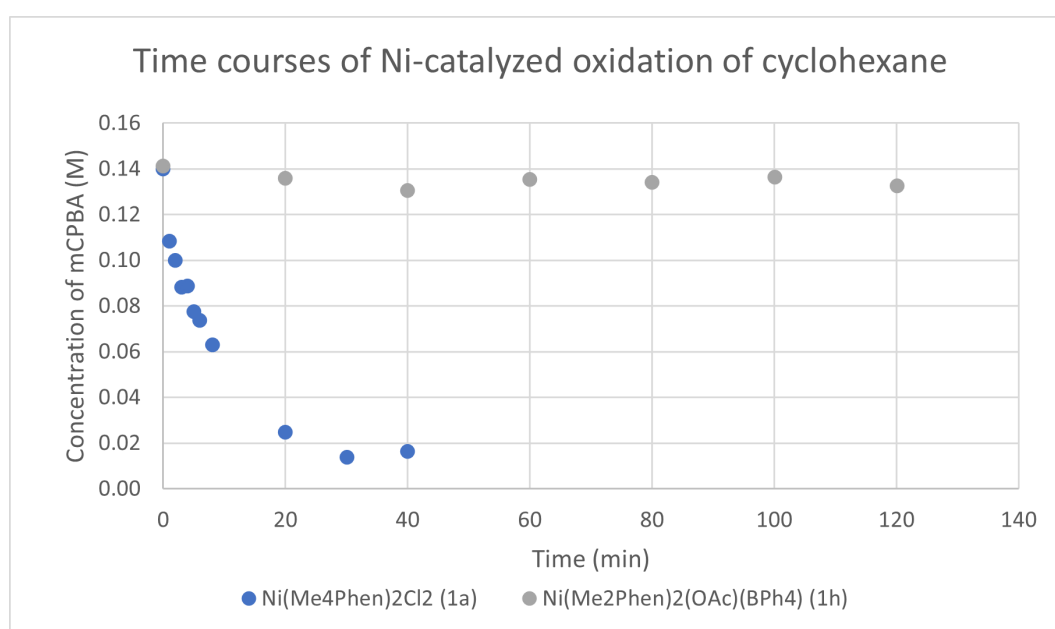

**Figure S6.** Time courses of the oxidation of cyclohexane catalyzed by Ni complexes **1a** and **1h**.

## 4. Ni-catalyzed Oxidation of Adamantane (**3**)

### 4.1. General procedure for Ni-catalyzed oxidation of **3** by *m*CPBA

To a 4 mL vial equipped with a stir bar was added *m*CPBA (28.8 mg, 0.125 mmol, ~75% purity), alkane **3** (34.1 mg, 2.00 equiv), and a mixture of dichloromethane and acetonitrile (3:1 v/v, 1.0 mL) as solvent. Ni complexes **1a-1h** were added as stock solutions or suspensions in DCM. NiCl<sub>2</sub> and CoCl<sub>2</sub> were added as stock solutions in a mixture of methanol and acetonitrile (1:9 v/v). The vial was sealed, and the reaction

mixture was stirred at 50 °C for 1-4 h. After cooling to room temperature, n-dodecane (28.0 μL, 0.123 mmol) was added as an internal standard. An aliquot (~ 60 μL) of the mixture was taken, diluted with ethyl acetate, and subjected to analysis by GC.

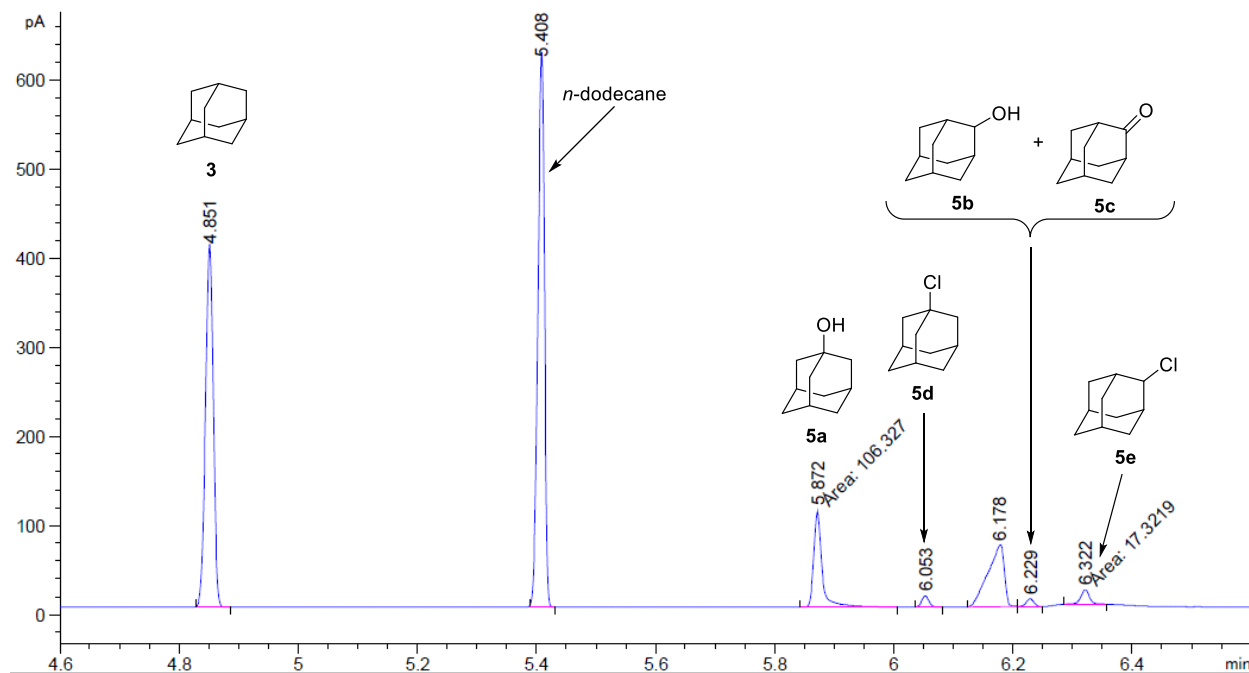

**Figure S7.** A typical GC trace of the reaction mixture from the Ni-catalyzed oxidation of **3**.

#### 4.2. Results of transition metal catalyzed oxidation of **3**

$$\frac{A_{pdt}}{A_{I.S.}} = R_f \frac{m_{pdt}}{m_{I.S.}} \quad (\text{S1})$$

The response factor ( $R_f$ ) for the products of oxidation with respect to the internal standard (n-dodecane) is defined in eq S1.  $A_{pdt}$  and  $A_{I.S.}$  represent the area under the peak of the product and the internal standard in the GC trace, respectively.  $m_{pdt}$  and  $m_{I.S.}$  represent the mass (measured in milligrams) of the product and the internal standard, respectively. The response factors for 1-adamantanol (**5a**), 2-adamantanol (**5b**), 2-adamantanone (**5c**), 1-chloroadamantane (**5d**) and 2-chloroadamantane (**5e**) were measured to be 0.9255 ( $R^2 = 0.9907$ ), 0.9515 ( $R^2 = 0.9942$ ), 0.8936 ( $R^2 = 0.9961$ ), 0.8259 ( $R^2 = 0.9962$ ) and 0.8425 ( $R^2 = 0.9966$ ), respectively.

**Table S2. Results of oxidation of adamantane in the presence of different catalysts**

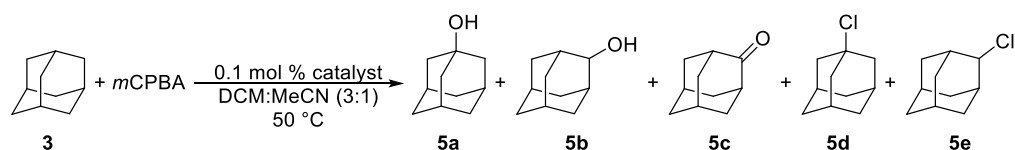

| Entry | Catalyst                                                                      | Time (h) <sup>a</sup> | <b>5a</b> (%) | <b>5b+5c</b> (%) | <b>5d</b> (%) | <b>5e</b> (%) |
|-------|-------------------------------------------------------------------------------|-----------------------|---------------|------------------|---------------|---------------|
| 1     | Ni(Me <sub>4</sub> Phen) <sub>2</sub> Cl <sub>2</sub><br><b>(1a)</b>          | 1                     | 32.7          | 2.6              | 3.0           | 7.1           |
| 2     |                                                                               |                       | 44.1          | 2.9              | 2.2           | 0             |
| 3     |                                                                               |                       | 33.3          | 3.9              | 2.8           | 4.5           |
| 4     | Ni(bpy) <sub>2</sub> Cl <sub>2</sub><br><b>(1b)</b>                           | 1                     | 28.1          | 2.4              | 2.9           | 4.4           |
| 5     |                                                                               |                       | 35.0          | 2.7              | 2.3           | 0             |
| 6     |                                                                               |                       | 28.7          | 2.7              | 3.2           | 3.6           |
| 7     | Ni(box) <sub>3</sub> (BPh <sub>4</sub> ) <sub>2</sub><br><b>(1c)</b>          | 1                     | 27.3          | 2.1              | 2.5           | 4.1           |
| 8     |                                                                               |                       | 37.2          | 2.7              | 2.2           | 0             |
| 9     |                                                                               |                       | 27.2          | 2.4              | 2.5           | 3.1           |
| 10    | Ni(tBubpy) <sub>3</sub> (BPh <sub>4</sub> ) <sub>2</sub><br><b>(1d)</b>       | 1.5                   | 27.3          | 3.2              | 4.6           | 3.9           |
| 11    |                                                                               |                       | 23.4          | 2.4              | 4.2           | 3.4           |
| 12    |                                                                               |                       | 24.1          | 1.9              | 3.2           | 4.6           |
| 13    | Ni(TPA)(H <sub>2</sub> O)(OAc)(BPh <sub>4</sub> )<br><b>(1e)</b>              | 1.5                   | 31.2          | 2.5              | 4.9           | 5.5           |
| 14    |                                                                               |                       | 28.8          | 2.4              | 4.8           | 5.0           |
| 15    |                                                                               |                       | 30.0          | 2.6              | 4.7           | 4.3           |
| 16    | Ni(Brbpy) <sub>2</sub> Cl <sub>2</sub><br><b>(1f)</b>                         | 2                     | 34.2          | 2.8              | 4.3           | 4.1           |
| 17    |                                                                               |                       | 45.3          | 3.0              | 3.7           | 4.5           |
| 18    |                                                                               |                       | 35.9          | 3.3              | 2.5           | 3.8           |
| 19    | Ni(bpyPY2Me)Cl <sub>2</sub><br><b>(1g)</b>                                    | 3                     | 29.2          | 3.1              | 5.2           | 5.1           |
| 20    |                                                                               |                       | 30.1          | 2.5              | 5.8           | 5.6           |
| 21    |                                                                               |                       | 27.8          | 2.1              | 4.6           | 4.2           |
| 22    | Ni(Me <sub>2</sub> Phen) <sub>2</sub> (OAc)(BPh <sub>4</sub> )<br><b>(1h)</b> | 4                     | 22.8          | 1.6              | 4.4           | 2.9           |
| 23    |                                                                               |                       | 20.6          | 1.3              | 3.9           | 2.6           |
| 24    |                                                                               |                       | 18.7          | 1.3              | 3.6           | 2.3           |
| 25    | NiCl <sub>2</sub>                                                             | 4                     | 27.6          | 2.5              | 4.1           | 3.6           |
| 26    |                                                                               |                       | 26.7          | 2.3              | 4.5           | 3.5           |
| 27    |                                                                               |                       | 30.2          | 2.5              | 4.6           | 3.5           |
| 28    | CoCl <sub>2</sub>                                                             | 1.5                   | 27.6          | 2.9              | 2.3           | 3.2           |
| 29    |                                                                               |                       | 27.4          | 2.8              | 2.3           | 3.2           |
| 30    |                                                                               |                       | 28.7          | 2.8              | 1.4           | 0             |
| 31    | none                                                                          | 4                     | 5.9           | 0                | 0             | 0             |
| 32    |                                                                               |                       | 14.6          | 1.9              | 1.2           | 0.6           |

|    |  |  |     |   |   |   |
|----|--|--|-----|---|---|---|
| 33 |  |  | 6.0 | 0 | 0 | 0 |
|----|--|--|-----|---|---|---|

## 5. Ni-catalyzed Oxidation of Adamantane in the Presence of CCl<sub>4</sub>

To a 4 mL vial equipped with a stir bar was added *m*CPBA (28.8 mg, 0.125 mmol, ~75% purity), alkane **3** (34.1 mg, 2.00 equiv), CCl<sub>4</sub> (1.0 equiv, 12 μL) and a mixture of dichloromethane and acetonitrile (3:1 v/v, 1.0 mL) as solvent. Ni complex **1a** (0.1 mol %) was added as a suspension in DCM. The vial was sealed, and the reaction mixture was stirred at 50 °C for 1 h. After cooling to room temperature, *n*-dodecane (28.0 μL, 0.123 mmol) was added as an internal standard. An aliquot (~ 60 μL) of the mixture was taken, diluted with ethyl acetate, and subjected to analysis by GC.

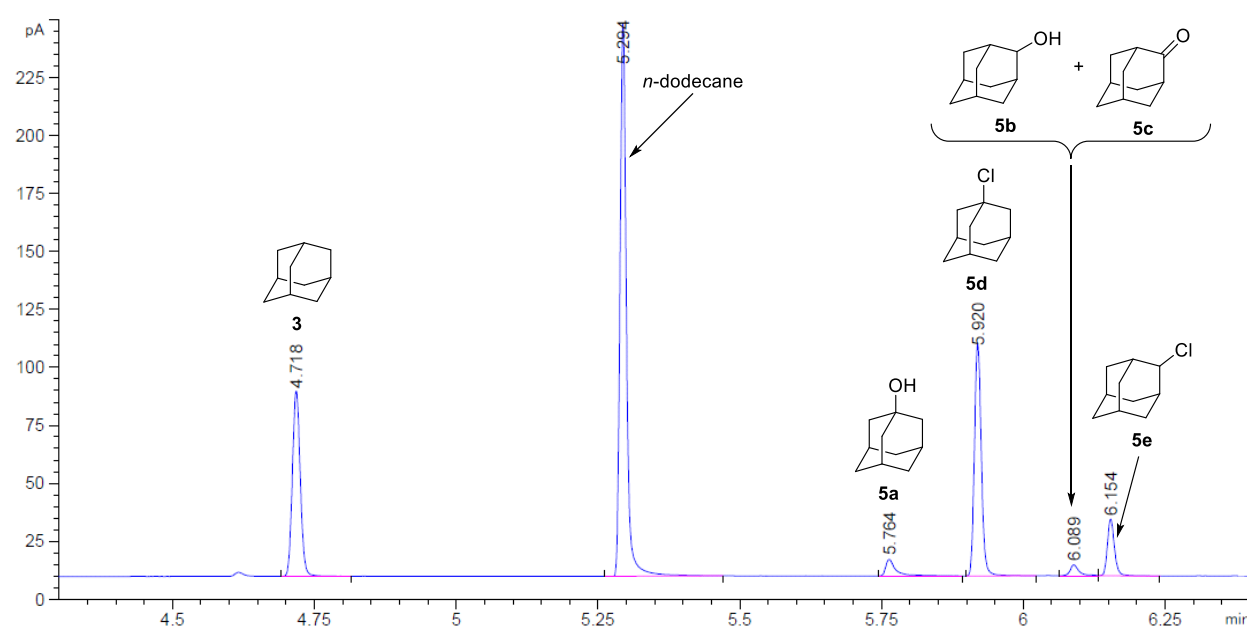

**Figure S8.** The GC trace of the reaction mixture from Ni-catalyzed oxidation of **3** in the presence of CCl<sub>4</sub>.

## 6. Ni-catalyzed Oxidation of *cis*- and *trans*-1,2-Dimethylcyclohexane (*cis*- and *trans*-**6**)

### 6.1. General procedure for Ni-catalyzed oxidation of *cis*- or *trans*-**6** by *m*CPBA

To a 4 mL vial equipped with a stir bar was added *m*CPBA (28.8 mg, 0.125 mmol, ~75% purity), alkane *cis*- or *trans*-**6** (7.50 equiv), and a mixture of dichloromethane and acetonitrile (3:1 v/v, 1.0 mL) as solvent.

Ni complexes **1a-1g** were added as stock solutions or suspensions in DCM. NiCl<sub>2</sub> was added as a stock solution in a mixture of methanol and acetonitrile (1:9 v/v). The vial was sealed, and the reaction mixture was stirred at 50 °C for 1-4 h. After cooling to room temperature, n-dodecane (28.0 μL, 0.123 mmol) was added as an internal standard. An aliquot (~ 60 μL) of the mixture was taken, diluted with ethyl acetate, and subjected to analysis by GC.

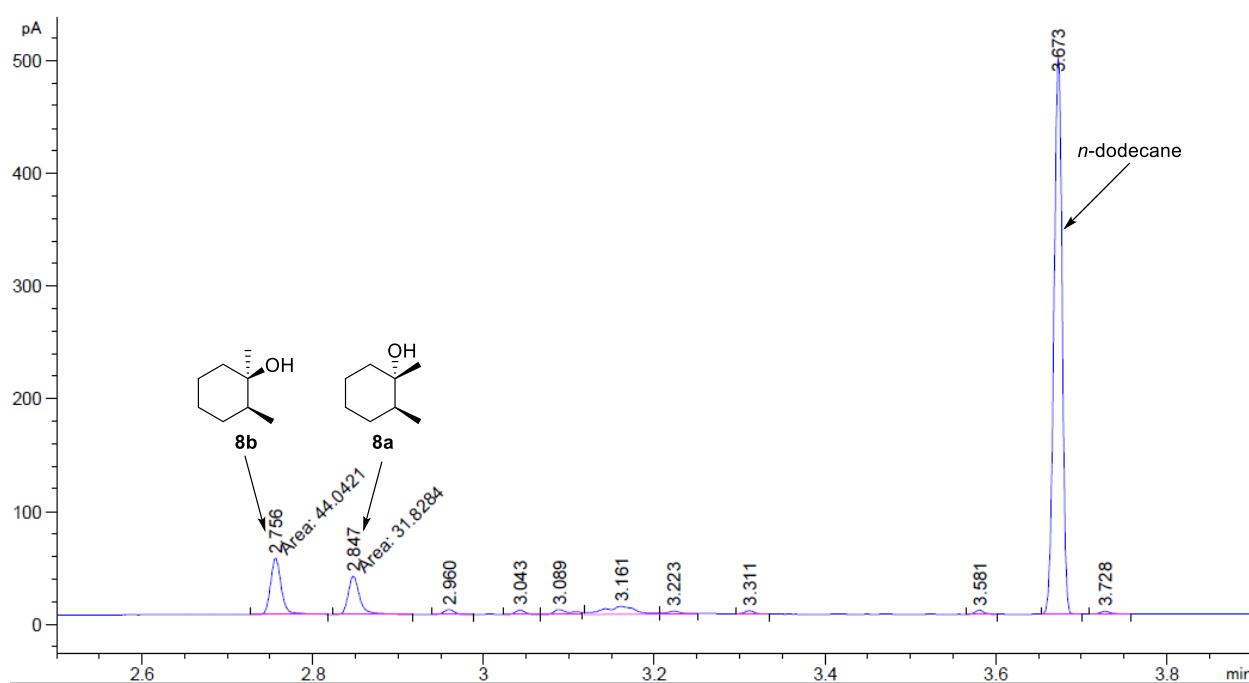

**Figure S9.** A typical GC trace of the reaction mixture from Ni-catalyzed oxidation of *cis*- or *trans*-**6**.

## 6.2. Results of Ni-catalyzed oxidation of *cis*-**6**

The GC response factor ( $R_f$ ), defined in eq S1, of alcohol **8a** with respect to n-dodecane was determined to be 0.7457 ( $R^2 = 0.9936$ ). The response factor of alcohol **8b**, which is a diastereomer of **8a**, was assumed to be identical to that of **8a**.

**Table S3. Results of Ni-catalyzed oxidation of *cis*-**6****

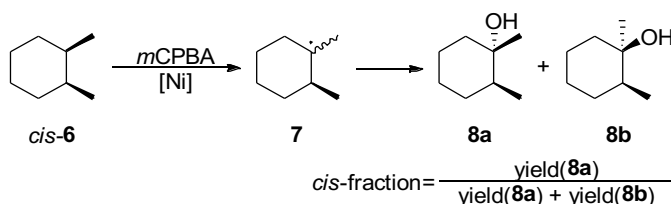

| Entry | [Ni]              | <b>8a</b> (%) | <b>8b</b> (%) | <i>cis</i> -fraction (%) |
|-------|-------------------|---------------|---------------|--------------------------|
| 1     | <b>1a</b>         | 28.0          | 37.4          | 42.7                     |
| 2     |                   | 23.4          | 30.9          | 43.1                     |
| 3     |                   | 17.3          | 23.9          | 42.0                     |
| 4     | <b>1b</b>         | 17.3          | 22.2          | 43.8                     |
| 5     |                   | 22.4          | 28.5          | 44.1                     |
| 6     |                   | 21.1          | 27.8          | 43.1                     |
| 7     | <b>1c</b>         | 18.2          | 23.9          | 43.3                     |
| 8     |                   | 15.7          | 20.8          | 43.0                     |
| 9     |                   | 19.5          | 25.8          | 43.0                     |
| 10    | <b>1e</b>         | 15.7          | 15.3          | 50.6                     |
| 11    |                   | 19.8          | 20.6          | 49.0                     |
| 12    |                   | 18.2          | 20.5          | 47.0                     |
| 13    | <b>1f</b>         | 26.0          | 28.6          | 47.6                     |
| 14    |                   | 26.4          | 27.8          | 48.7                     |
| 15    |                   | 19.1          | 24.1          | 44.2                     |
| 16    | <b>1g</b>         | 13.7          | 13.8          | 49.8                     |
| 17    |                   | 17.1          | 19.2          | 47.2                     |
| 18    |                   | 21.8          | 26.7          | 44.9                     |
| 19    | NiCl <sub>2</sub> | 23.2          | 26.2          | 46.9                     |
| 20    |                   | 24.9          | 23.3          | 51.6                     |
| 21    |                   | 20.0          | 24.4          | 45.1                     |

### 6.3. Results of Ni-catalyzed oxidation of *trans*-6

**Table S4. Results of Ni-catalyzed oxidation of *trans*-6**

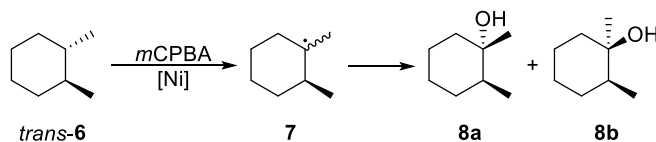

| Entry | [Ni]      | <b>8a</b> (%) | <b>8b</b> (%) | <i>cis</i> -fraction (%) |
|-------|-----------|---------------|---------------|--------------------------|
| 1     | <b>1a</b> | 10.8          | 15.0          | 41.8                     |
| 2     |           | 11.1          | 15.6          | 41.7                     |
| 3     |           | 12.4          | 17.3          | 41.6                     |
| 4     | <b>1b</b> | 11.1          | 15.5          | 41.8                     |
| 5     |           | 10.8          | 15.0          | 41.8                     |
| 6     |           | 13.3          | 19.0          | 41.3                     |
| 7     | <b>1c</b> | 9.6           | 13.3          | 41.8                     |
| 8     |           | 11.1          | 15.8          | 41.3                     |
| 9     |           | 12.8          | 18.4          | 41.1                     |
| 10    | <b>1e</b> | 7.5           | 12.7          | 37.1                     |
| 11    |           | 7.7           | 13.3          | 36.7                     |
| 12    |           | 9.3           | 16.0          | 36.9                     |
| 13    | <b>1f</b> | 10.7          | 16.5          | 39.3                     |
| 14    |           | 9.7           | 15.1          | 39.2                     |
| 15    | <b>1g</b> | 3.7           | 6.2           | 37.5                     |
| 16    |           | 5.1           | 8.7           | 37.1                     |

|    |                   |      |      |      |
|----|-------------------|------|------|------|
| 17 |                   | 8.9  | 15.2 | 36.9 |
| 18 | NiCl <sub>2</sub> | 10.4 | 17.0 | 38.1 |
| 19 |                   | 4.4  | 6.6  | 40.1 |
| 20 |                   | 9.6  | 14.9 | 39.1 |

## 7. Ni-catalyzed Decomposition of *m*CPBA

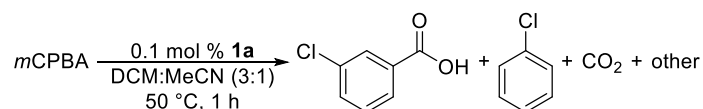

To a 4 mL vial equipped with a stir bar was added *m*CPBA (28.8 mg, 0.125 mmol, ~75% purity), dibromomethane (4.4  $\mu$ L, 0.50 equiv) as the internal standard, and a mixture of dichloromethane and acetonitrile (3:1 v/v, 1.0 mL) as solvent. Ni complex **1a** (0.1 mol %) was added as a suspension in DCM. The vial was sparged with N<sub>2</sub> for 5 min, sealed, and the reaction mixture was stirred at 50 °C for 1 h. An aliquot (~ 30  $\mu$ L) of the mixture was taken, diluted with acetonitrile-*d*<sub>3</sub>, and subjected to analysis by <sup>1</sup>H NMR spectroscopy.

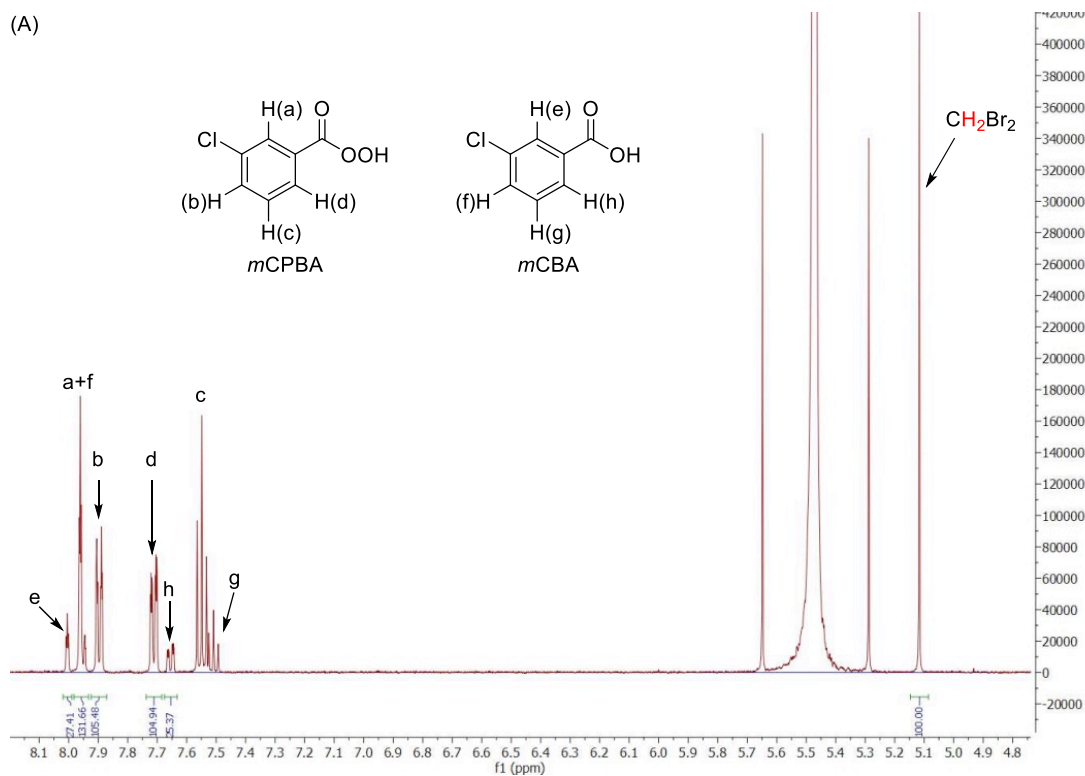



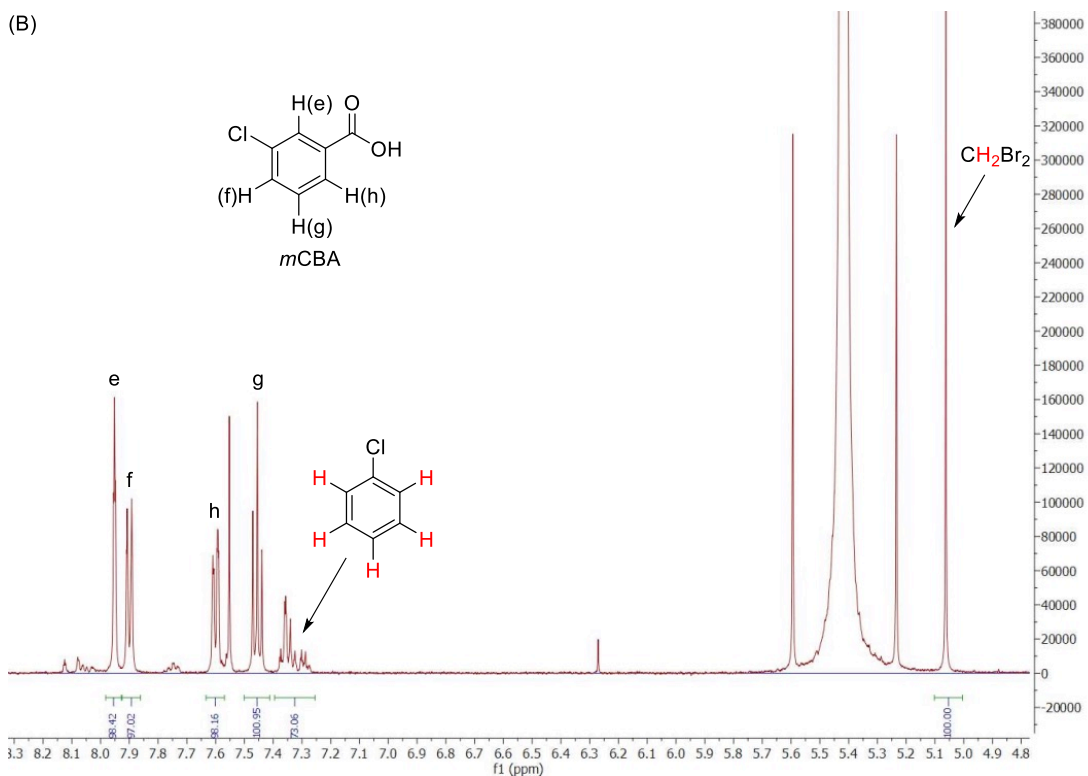

**Figure S10.**  $^1\text{H}$  NMR spectra of the reaction mixture from Ni-catalyzed decomposition of *m*CPBA in the absence of alkane (A) at  $t = 0$  and (B) at  $t = 1$  h.

### 7.1. Time courses of Ni-catalyzed decomposition of *m*CPBA.

To a 4 mL vial equipped with a stir bar was added *m*CPBA (28.8 mg, 0.125 mmol, ~75% purity), dibromomethane (4.4  $\mu\text{L}$ , 0.50 equiv) as the internal standard and chloroform- $d_1$  (3:1 v/v, 1.0 mL) as solvent. Ni complexes **1a** and **1h** were added as stock solutions or suspensions in  $\text{CDCl}_3$ . The vial was capped, and the reaction mixture was stirred at 50  $^\circ\text{C}$ . Aliquots (~ 15  $\mu\text{L}$ ) were periodically taken from the reaction mixture, diluted with chloroform- $d_1$ , and subjected to analysis by  $^1\text{H}$  NMR spectroscopy.

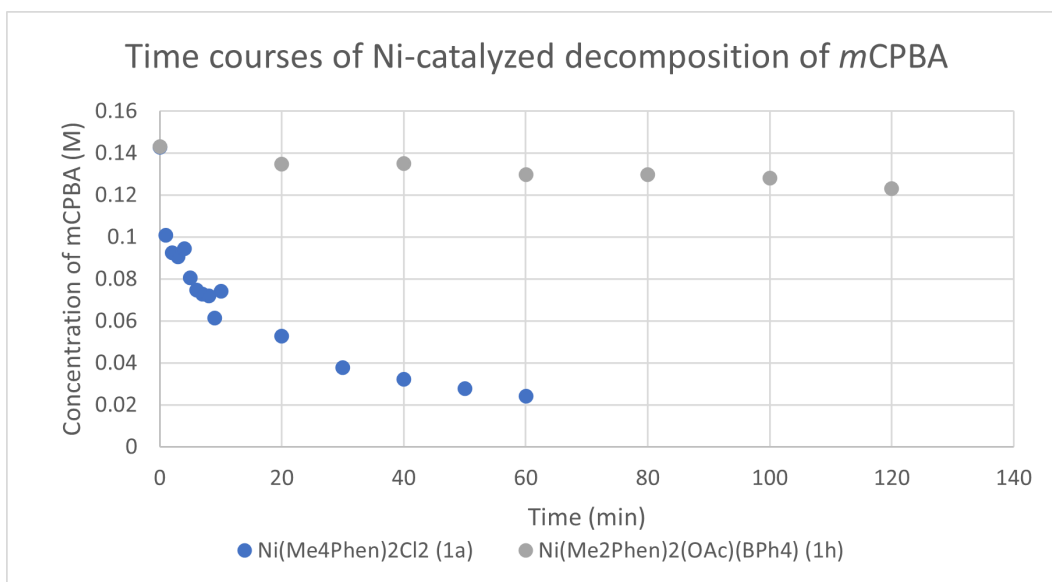

**Figure S11.** Time courses of the decomposition of *m*CPBA catalyzed by Ni complexes **1a** and **1h**.

## 8. EPR Spectra of Stoichiometric Reactions of Ni Complex **1a**

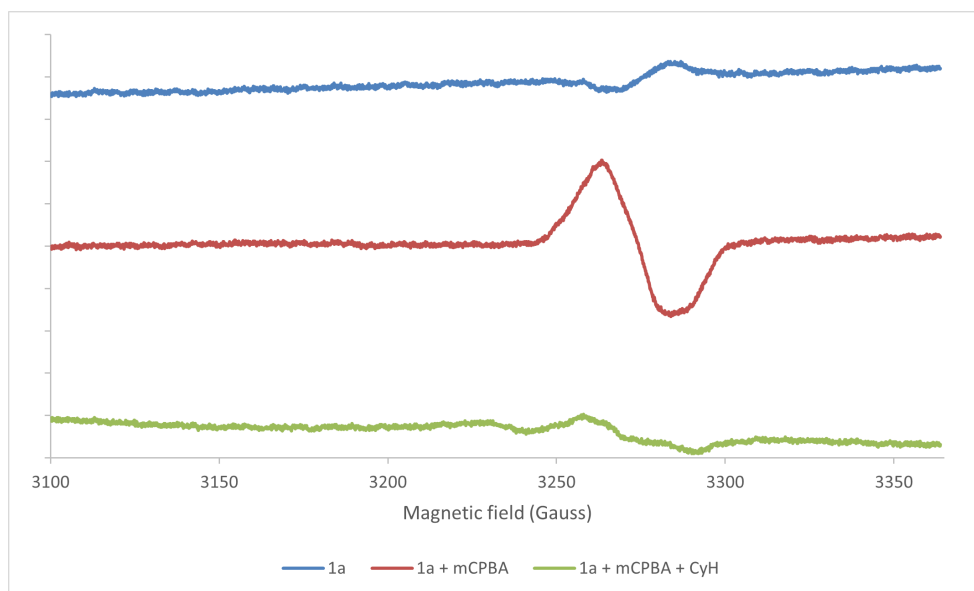

**Figure S12.** Overlaid EPR spectra of (a) 10 mM methanol solution of complex **1a** (**1a**, blue); (b) 10 mM methanol solution of complex **1a** with 5 equiv of *m*CPBA after heating at 50 °C for 30 s (**1a** + *m*CPBA, red); (c) 10 mM methanol solution of complex **1a** with 5 equiv of *m*CPBA and 10 equiv of cyclohexane after heating at 50 °C for 30 s (**1a** + *m*CPBA + CyH, green).

Complex **1a**, which is a Ni(II) compound with  $d^8$  electron configuration, is EPR-silent (Figure S12, blue curve). Reaction of **1a** with 5 equivalents of *m*CPBA resulted in an isotropic signal ( $g = 2.007$ ) at 3282 Gauss (Figure S12, red curve), which likely corresponds to an oxygen-centered organic free radical rather than a species containing a Ni-O bond because the signals of reported Ni-OH and Ni-O• or Ni=O species are generally centered around 3100 Gauss and have more complex peak shapes.<sup>4-6</sup> Reaction of **1a** with 5 equivalents of *m*CPBA in methanol and 10 equivalents (with respect to Ni) of cyclohexane did not lead to a pronounced EPR signal, likely due to quenching of the oxygen-centered free radical by the cyclohexane (Figure S12, green curve).

### 9. Photo-mediated Oxidation of Adamantane (**3**) by Benzil and Oxygen

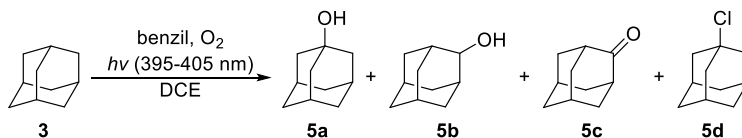

To a 4 mL vial equipped with a stir bar was added benzil (26.3 mg, 0.125 mmol), adamantane (34.1 mg, 0.250 mmol) and 1,2-dichloroethane (DCE, 1.5 mL) as the solvent. The solution was sparged with O<sub>2</sub> for 10 min. Then a UV lamp (395-405 nm) was turned on and the solution was sparged with O<sub>2</sub> for another 10 min. Sparging was then stopped to prevent extensive evaporation of solvent and the solution was stirred under an atmosphere of O<sub>2</sub> and UV irradiation for the required time. After the UV lamp was turned off, *n*-dodecane (28.0  $\mu$ L, 0.123 mmol) was added to the reaction mixture as an internal standard. An aliquot (40-50  $\mu$ L) of this mixture was transferred to a GC vial, diluted with ethyl acetate, and subjected to analysis by GC.

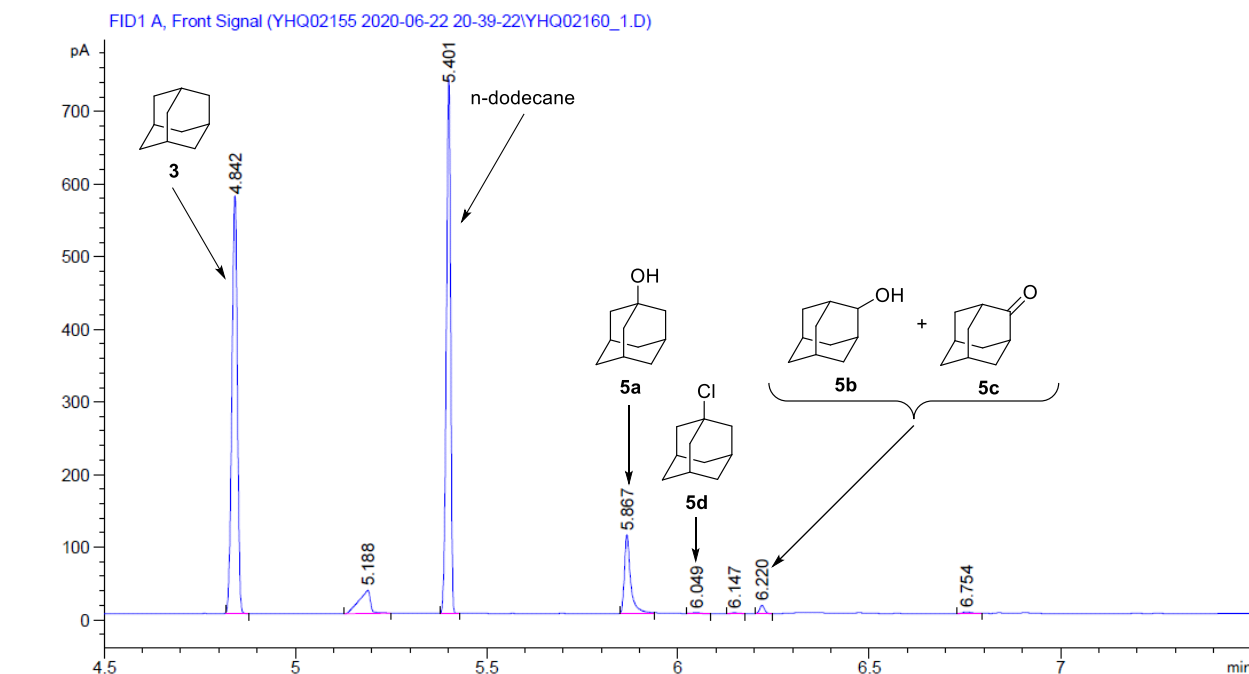

**Figure S13.** A typical GC trace of the reaction mixture from the photo-mediated oxidation of **3** by benzil and O<sub>2</sub>.

1-Adamantanol (**5a**) was formed as the major product and byproducts **3b**, **3c** and **3d** were formed in less than 3% yield. 2-Chloroadamantane (**5e**) was not observed. The results of this experiment were summarized in Table S5.

**Table S5. Results of the photo-mediated oxidation of adamantane by benzil and O<sub>2</sub>**

| Entry | Time (min) | Temperature | <b>5a</b> (%) <sup>a</sup> | <b>5b + 5c</b> (%) <sup>a</sup> | <b>5d</b> (%) <sup>a</sup> | 3°/2° <sup>b</sup> |
|-------|------------|-------------|----------------------------|---------------------------------|----------------------------|--------------------|
| 1     | 75         | rt          | 20.9                       | 1.9                             | 0.3                        | 11.3               |
| 2     | 133        | rt          | 25.8                       | 2.3                             | 0.3                        | 11.5               |
| 3     | 133        | rt          | 28.4                       | 2.4                             | 0.4                        | 12.1               |
| 4     | 128        | 50 °C       | 31.8                       | 2.9                             | 0.5                        | 11.2               |
| 5     | 128        | 50 °C       | 31.3                       | 2.8                             | 0.5                        | 11.4               |

<sup>a</sup>All yields were calculated based on benzil. <sup>b</sup>Defined as the ratio of the combined yield of **5a+5d** to the combined yield of **5b+5c**.

## 10. Ni-catalyzed Oxidation of Cyclohexane-*d*<sub>12</sub> (**2-d**<sub>12</sub>)

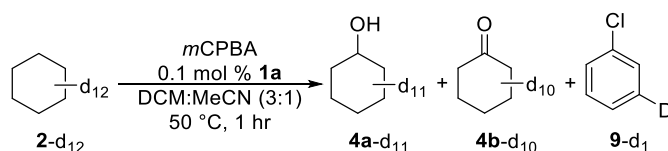

To a 4 mL vial equipped with a stir bar was added *m*CPBA (28.8 mg, 0.125 mmol, ~75% purity), deuterated alkane **2-d<sub>12</sub>** (5.00 equiv) and acetonitrile (1.0 mL) as solvent. Ni complex **1a** was added as a suspension in DCM. The vial was sealed, and the reaction mixture was stirred at 50 °C for 75 min. After cooling to room temperature, saturated aqueous solution of Na<sub>2</sub>CO<sub>3</sub> (2.0 mL) was added, and the mixture was extracted three times with DCM. The organic layer was separated, concentrated *in vacuo* to remove unreacted **2-d<sub>12</sub>**, then diluted to ~0.6 mL with DCM. CD<sub>2</sub>Cl<sub>2</sub> (2.4 μL, 0.30 equiv) was added as an internal standard, and the mixture was subjected to analysis by <sup>2</sup>H NMR spectroscopy.

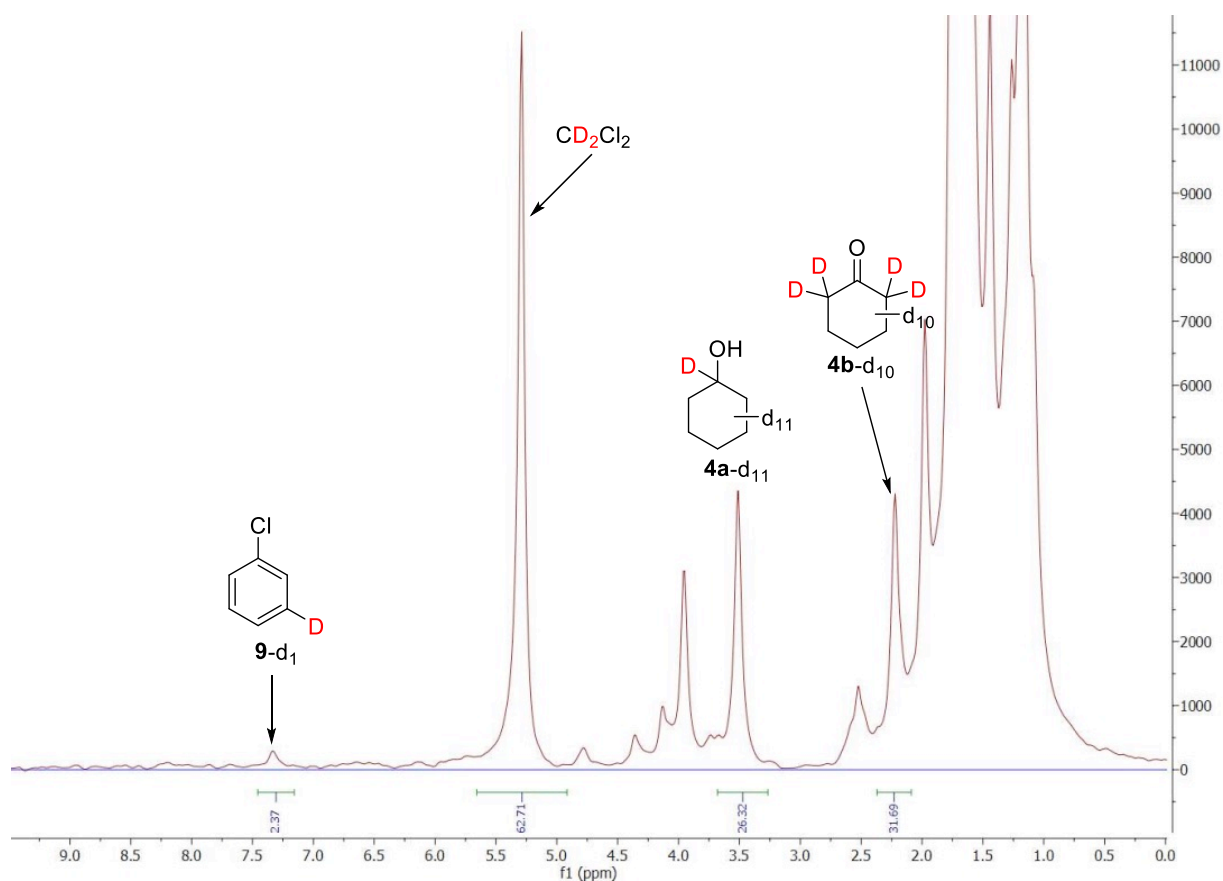

**Figure S14.** <sup>2</sup>H NMR spectrum of Ni-catalyzed oxidation of **2-d<sub>12</sub>** by *m*CPBA.

### 9.1. Hydrogen atom transfer (HAT) from solvent molecules to 3-chlorophenyl radical (**12**)

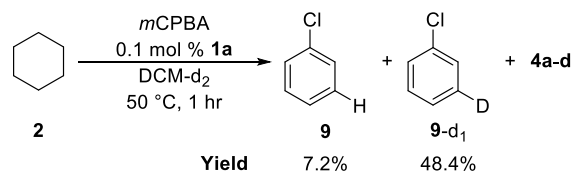

To a 4 mL vial equipped with a stir bar was added *m*CPBA (28.8 mg, 0.125 mmol, ~75% purity), cyclohexane (68.0  $\mu$ L, 0.625 mmol), catalyst **1a** (0.1 mol %), and DCM-*d*<sub>2</sub> (1 mL). The vial was sealed, and the reaction mixture was stirred at 50 °C for 1 h. After cooling to room temperature, dibromomethane (4.4  $\mu$ L, 0.5 equiv) was added to the reaction mixture as an internal standard. Half of this solution (0.5 mL) was then transferred to an NMR tube and subjected to analysis by <sup>1</sup>H NMR spectroscopy. The remaining half of the solution was evaporated under reduced pressure (340 mbar) until it was almost dry, then diluted with CH<sub>2</sub>Cl<sub>2</sub> (0.6 mL) and CD<sub>3</sub>CN (1.1  $\mu$ L, 0.17 equiv) was added as the internal standard. This mixture was transferred to another NMR tube and subjected to analysis by <sup>2</sup>H NMR spectroscopy.

The yields (based on *m*CPBA) of chlorobenzene (**9**) and deuterated chlorobenzene (**9-d**<sub>1</sub>) were determined, from <sup>1</sup>H and <sup>2</sup>H NMR spectra, to be 7.2% and 48.4%, respectively. This result shows that 87% of product **9** is labelled by deuterium for the reaction conducted in DCM-*d*<sub>2</sub> and strongly supports our hypothesis that most of the chlorobenzene byproduct is formed by hydrogen atom transfer from solvent molecules to radical **12** in Ni-catalyzed oxidation of alkanes.

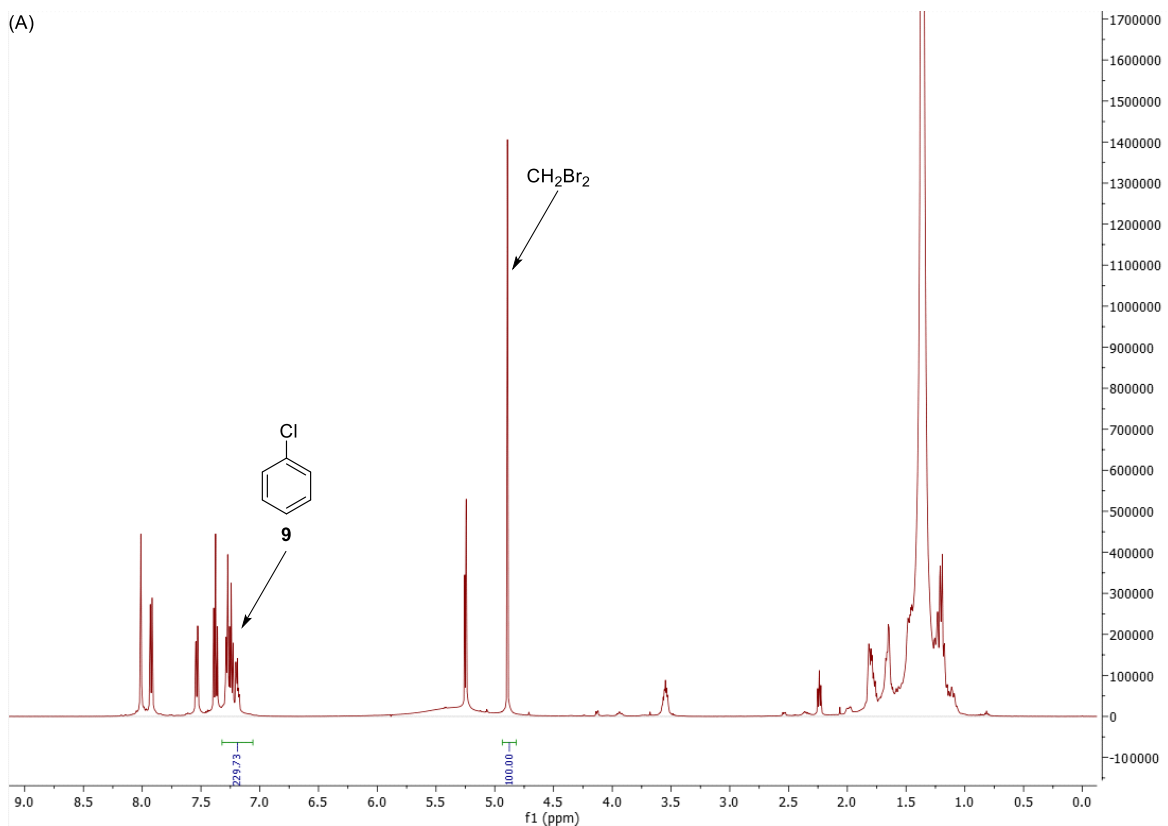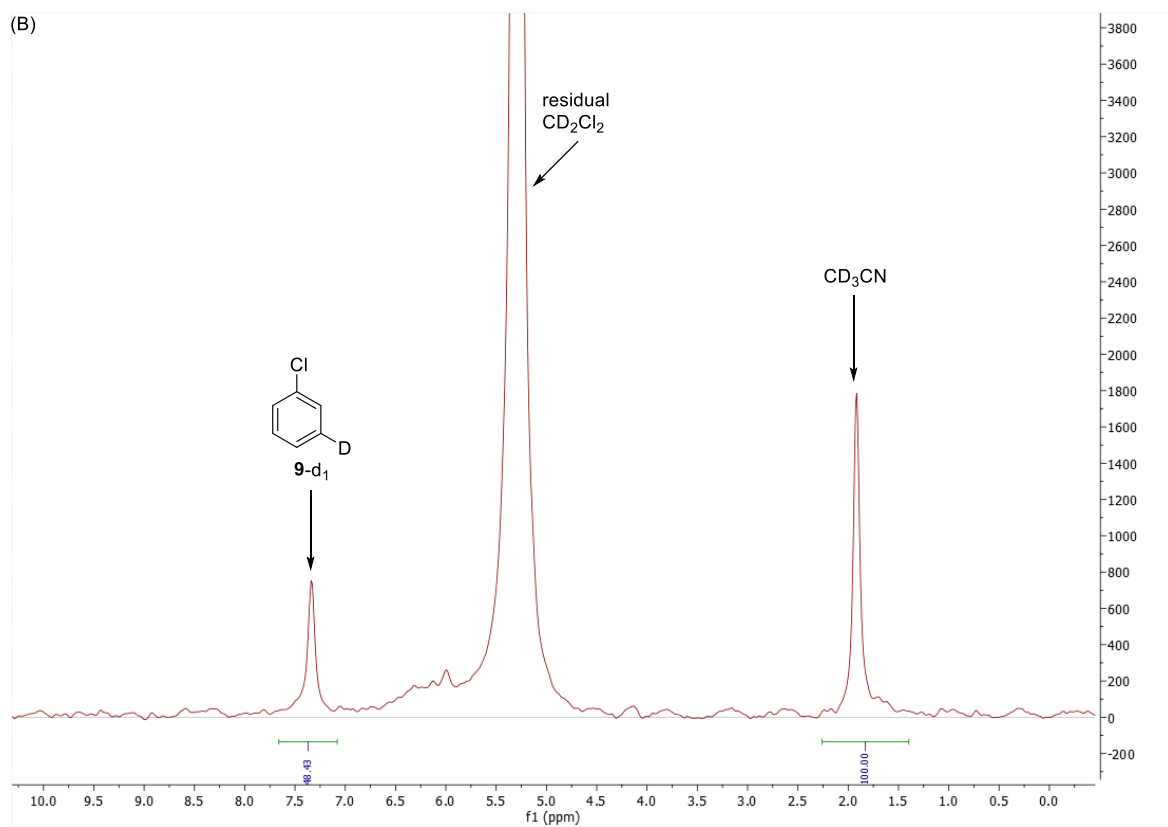

**Figure S15.** (A)  $^1\text{H}$  NMR spectrum and (B)  $^2\text{H}$  NMR spectrum from Ni-catalyzed oxidation of cyclohexane by *m*CPBA in  $\text{DCM-}d_2$ .

## 11. Bromination of 2,2,4,4-Tetramethylpentane (**16**)

### 10.1. General procedure for Ni-catalyzed bromination of **16** by *m*CPBA

In a  $\text{N}_2$ -filled dry box, *m*CPBA (28.8 mg, 0.125 mmol, ~75% purity), alkane **16** (111  $\mu\text{L}$ , 0.625 mmol),  $\text{CBr}_4$  (83.0 mg, 2.00 equiv) and dichloromethane (1.0 mL) were added to a 4 mL vial equipped with a stir bar. Ni complex **1a** (0.1 mol %) was added as a suspension in DCM. The vial was capped, sealed with electrical tape, and the reaction mixture was stirred at 50  $^\circ\text{C}$  for 1 h. After cooling to room temperature, mesitylene (5.8  $\mu\text{L}$ , 0.33 equiv) was added as an internal standard. An aliquot (~30  $\mu\text{L}$ ) of the mixture was taken, diluted with acetonitrile- $d_3$ , and subjected to analysis by  $^1\text{H}$  NMR spectroscopy.

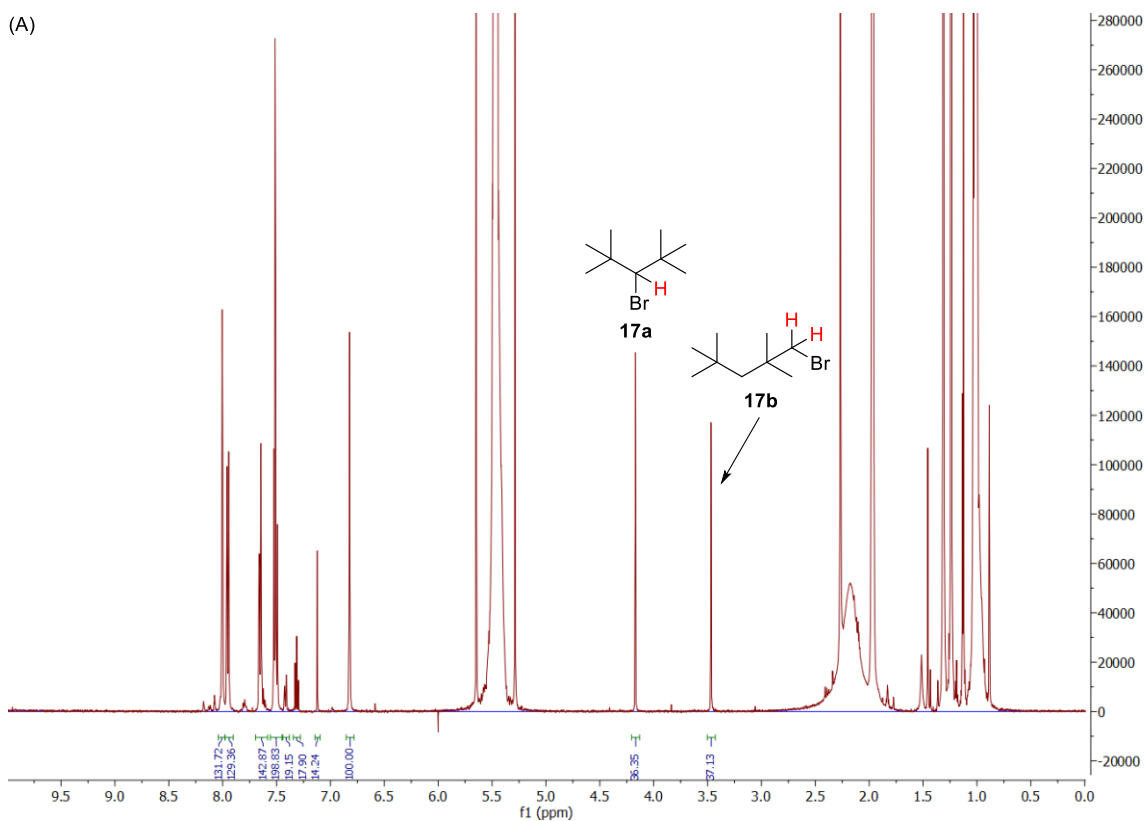



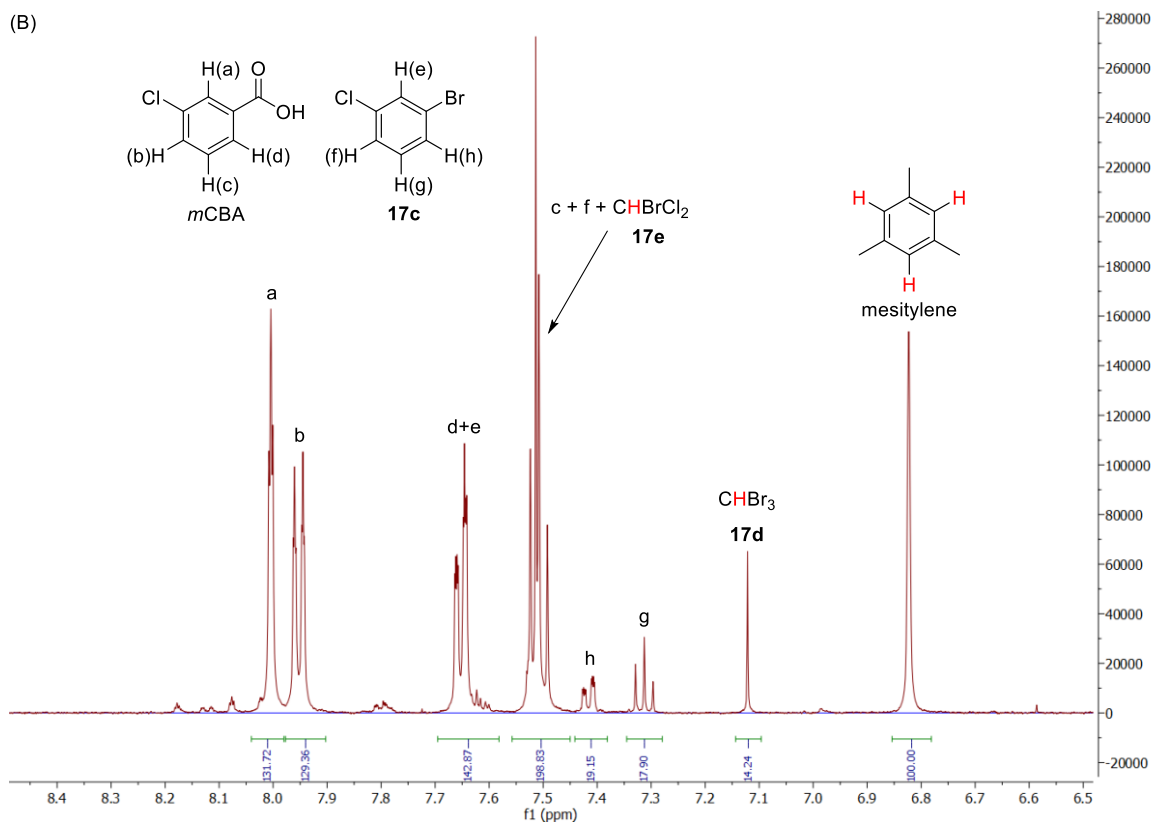

**Figure S16.** (A) A typical  $^1\text{H}$  NMR spectrum of the reaction mixture from Ni-catalyzed bromination of **16** by *m*CPBA; (B) the aromatic region of the spectrum in (A).

## 10.2. Synthesis of Bis(3-chlorobenzoyl)peroxide (**15**)

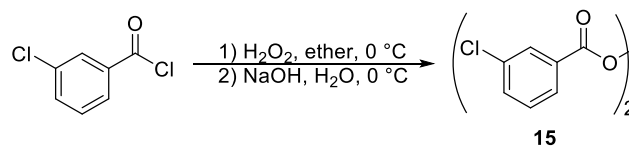

The following procedure was adapted from reported literature.<sup>7</sup>

In a 50 mL round bottom flask equipped with a stir bar, 3-chlorobenzoyl chloride (5.0 mmol, 0.88 g, 0.64 mL) was dissolved in ethyl ether (2.5 mL) and cooled to 0 °C. Hydrogen peroxide (2.90 mmol, 162  $\mu\text{L}$ , 50% w/w aqueous solution) was added to the stirring solution by slow addition over 10 min. Sodium hydroxide (6.300 mmol, 252.8 mg, dissolved in 2 mL  $\text{H}_2\text{O}$ ) was then added to the stirring solution by slow addition over 20 min. The resulting white precipitate was collected by filtration, washed with  $\text{H}_2\text{O}$  (5.0 mL  $\times$  2 times)

and ethyl ether (5.0 mL  $\times$  2 times), and dried under high vacuum for 4 h. Product **15** was obtained as a white powder (339.2 mg, 43.61% yield) and stored at -20 °C.

$^1\text{H}$  NMR (500 MHz,  $\text{CDCl}_3$ ):  $\delta$  8.06 (t,  $J = 1.9$  Hz, 1H), 7.96 (ddd,  $J = 7.8, 1.6, 1.1$  Hz, 1H), 7.65 (ddd,  $J = 8.1, 2.2, 1.1$  Hz, 1H), 7.48 (t,  $J = 7.9$  Hz, 1H).

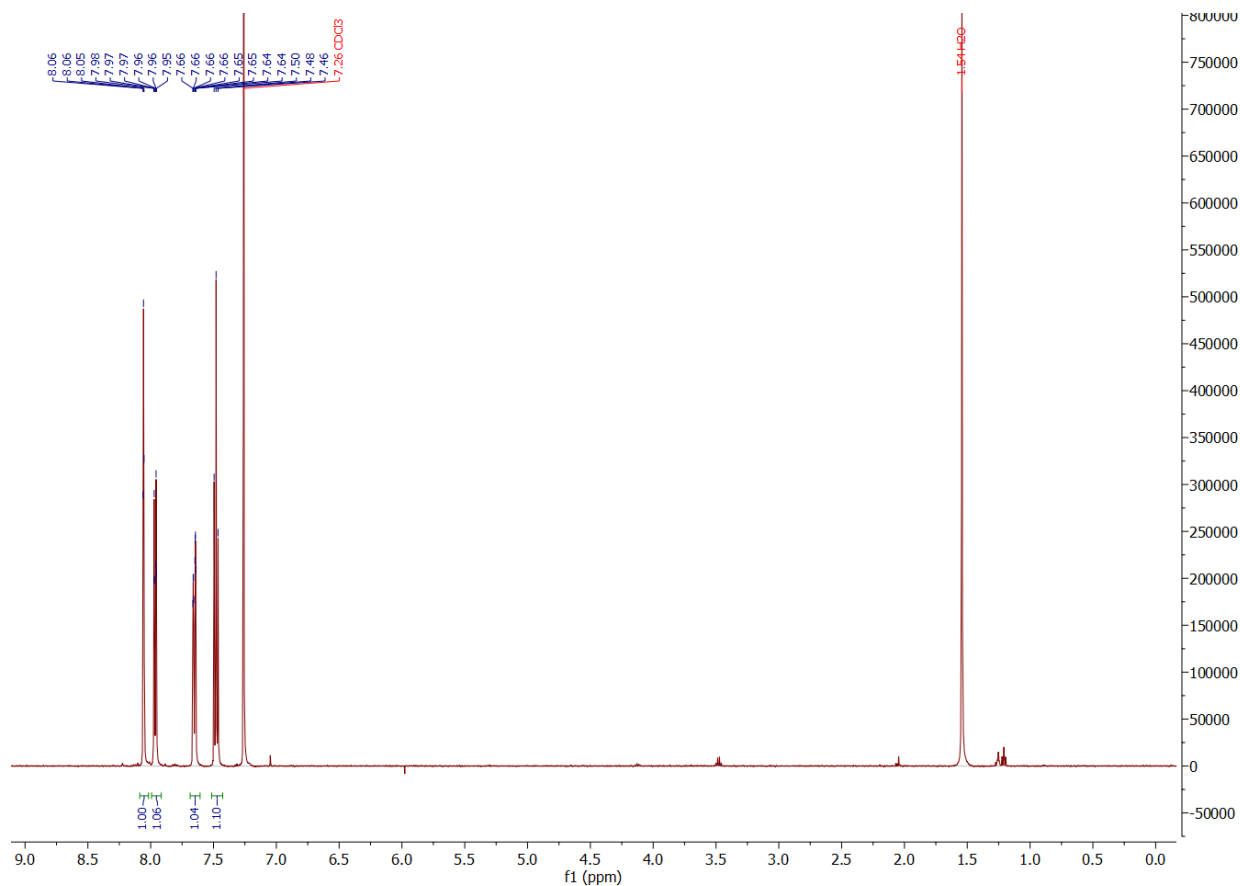

**Figure S17.**  $^1\text{H}$  NMR spectrum of compound **15**.

### 10.3. General procedure for bromination of **16** by peroxide **15**

In a  $\text{N}_2$ -filled dry box, peroxide **15** (19.4 mg, 0.0625 mmol), alkane **16** (111  $\mu\text{L}$ , 0.625 mmol),  $\text{CBr}_4$  (83.0 mg, 2.00 equiv) and dichloromethane (1.0 mL) were added to a 4 mL vial equipped with a stir bar. Ni complex **1a** (0.1 mol %) was added as a suspension in DCM. The vial was capped, sealed with electrical tape, and the reaction mixture was stirred at 80 °C for 13 h. After cooling to room temperature, mesitylene

(5.8  $\mu\text{L}$ , 0.33 equiv) was added as an internal standard. An aliquot ( $\sim 30 \mu\text{L}$ ) of the mixture was taken, diluted with acetonitrile- $d_3$ , and subjected to analysis by  $^1\text{H}$  NMR spectroscopy.

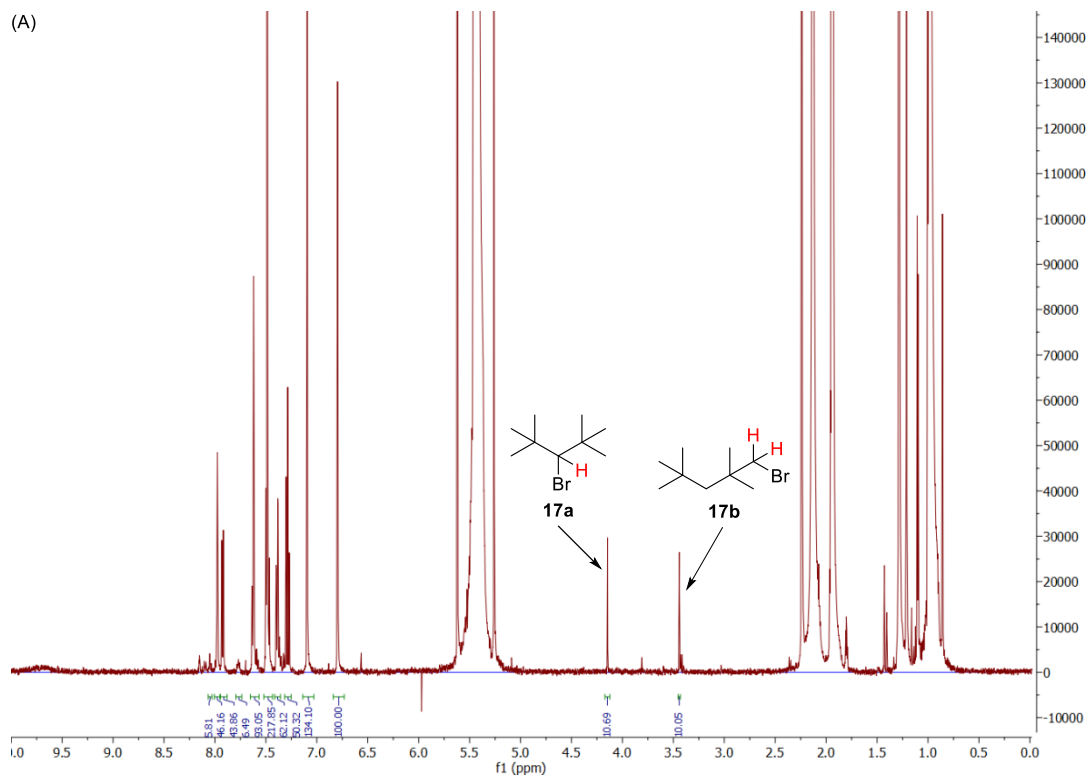

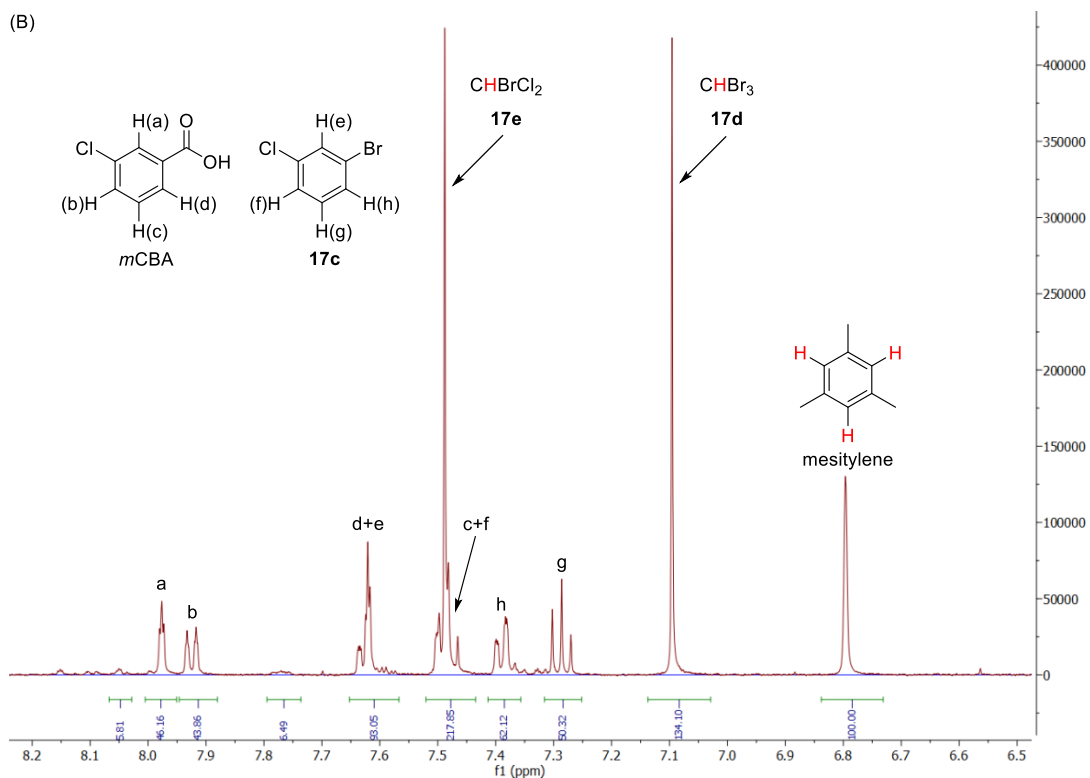

**Figure S18.** (A) A typical  $^1\text{H}$  NMR spectrum of the reaction mixture from the bromination of **16** by peroxide **15**; (B) the aromatic region of the spectrum in (A).

#### 10.4. Synthesis of 3,5-bis(trifluoromethyl)perbenzoic acid (**18**)

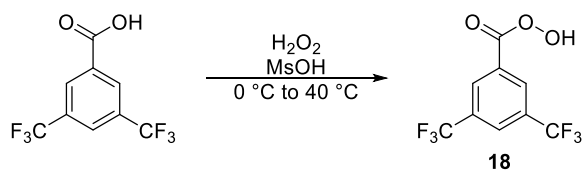

The following procedure was adapted from reported literature.<sup>8</sup>

Concentrated  $\text{H}_2\text{O}_2$  (approx. 90% w/w in  $\text{H}_2\text{O}$ ) was prepared by subjecting commercial  $\text{H}_2\text{O}_2$  solution (50 % w/w in  $\text{H}_2\text{O}$ ) to high vacuum for 8 h. **CAUTION:** Concentrated hydrogen peroxide should be stored in the freezer and handled with care due to potential hazard of explosion.

To a 25 mL pear-shaped flask equipped with a stir bar was added 3,5-bis(trifluoromethyl)benzoic acid (774.4 mg, 3.000 mmol, 1.000 equiv) and methanesulfonic acid (1.0 mL). The resulting slurry was stirred at 0 °C for 30 min, then  $\text{H}_2\text{O}_2$  (0.24 mL, 3 equiv, approx. 90% w/w in  $\text{H}_2\text{O}$ ) was added dropwise. The

reaction mixture was stirred at 40 °C for 1.5 h and subsequently quenched with 5 mL ice water. The white precipitate was collected by filtration and washed with 25 mL ice water. The crude product was obtained as a white solid (736.3 mg, approx. 85% purity by NMR) and used for Ni-catalyzed bromination of **16** without further purification. The major impurities in the crude product are water and the unreacted 3,5-bis(trifluoromethyl)benzoic acid.

$^1\text{H}$  NMR (300 MHz,  $\text{CDCl}_3$ ):  $\delta$  8.46 (s, 2H), 8.16 (s, 1H).

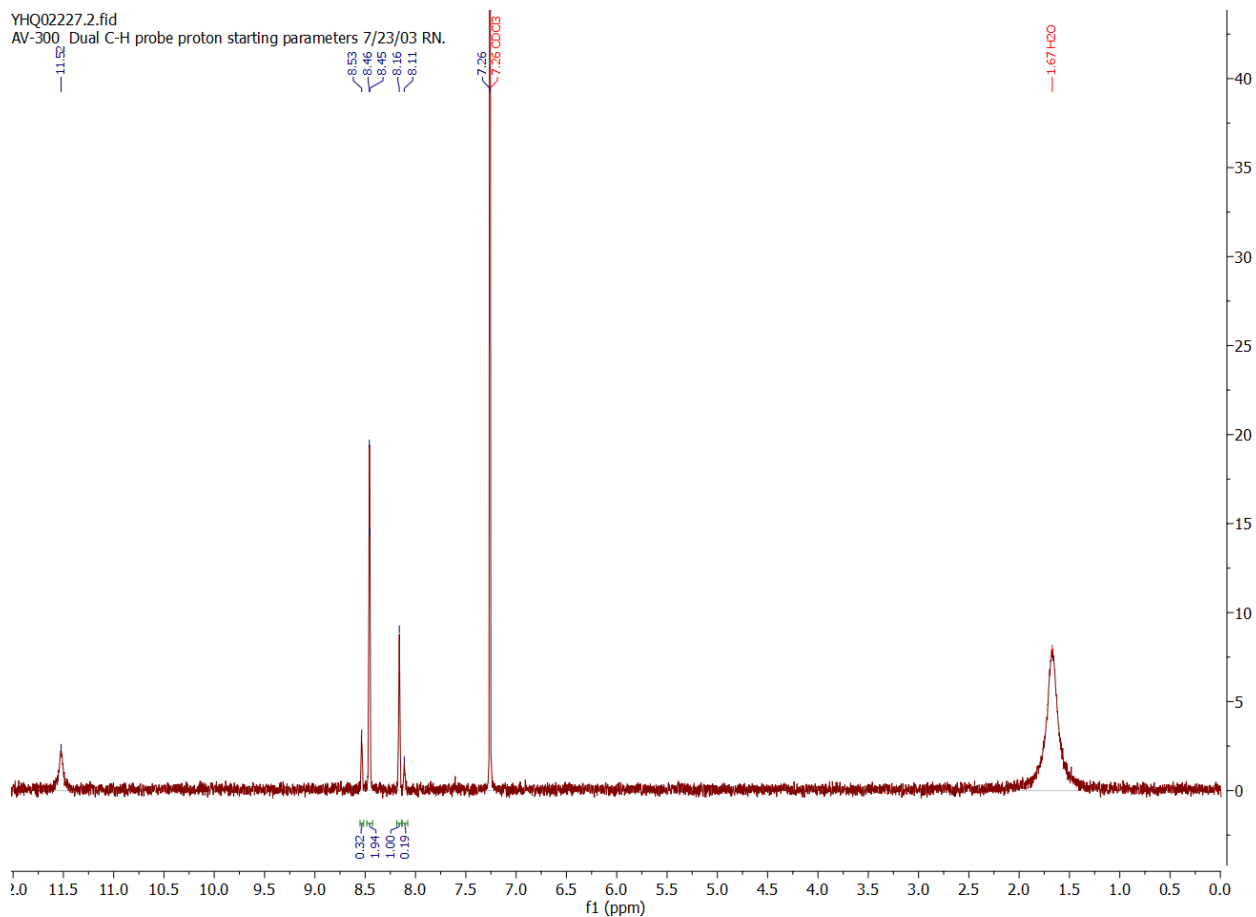

**Figure S19.**  $^1\text{H}$  NMR spectrum of the crude product of peracid **18**.

#### 10.5. General procedure for Ni-catalyzed bromination of **16** by peracid **18**

To a 4 mL vial equipped with a stir bar, peracid **18** (40.3 mg, 0.125 mmol, ~85% purity), alkane **16** (111  $\mu\text{L}$ , 0.625 mmol),  $\text{CBr}_4$  (83.0 mg, 2.00 equiv) and dichloromethane (1.0 mL) were added. Ni complex **1a**

(1 mol %) was added as a suspension in DCM. The vial was sparged with N<sub>2</sub> for 1 min, capped, sealed with electrical tape, and the reaction mixture was stirred at 50 °C for 1 h. After cooling to room temperature, mesitylene (5.8 μL, 0.33 equiv) was added as an internal standard. An aliquot (~ 25 μL) of the mixture was taken, diluted with acetonitrile-*d*<sub>3</sub>, and subjected to analysis by <sup>1</sup>H NMR spectroscopy.

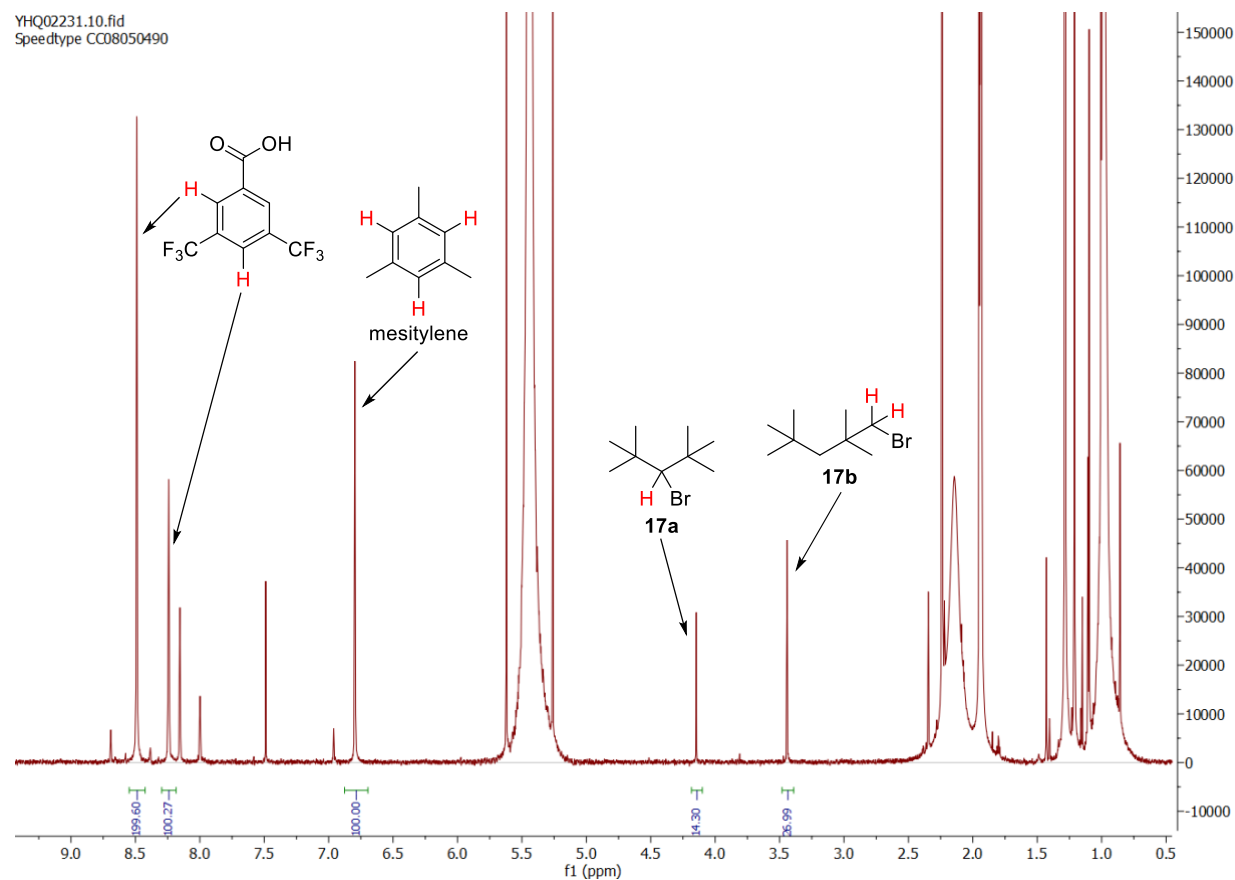

**Figure S20.** A typical <sup>1</sup>H NMR spectrum of the reaction mixture from the Ni-catalyzed bromination of **16** by peracid **18**.

## 10.6. Results and discussions

Results of three repeated experiments of Ni-catalyzed bromination of **16** by *m*CPBA and those of eight repeated experiments of bromination of **16** by peroxide **15** are summarized in Table S6 and S7, respectively.

In both reactions, byproducts *meta*-bromochlorobenzene (**17c**), bromoform (**17d**) and bromodichloromethane (**17e**) were formed together with brominated alkanes **17a** and **17b**. Compound **17c**

was likely formed by decarboxylation of radical **10**, followed by trapping with CBr<sub>4</sub>. Byproduct **17e** can be formed by the reaction of CHCl<sub>2</sub>· radical and CBr<sub>4</sub>. The formation of **17a** and **17b** in low yields in the nickel-free reaction can be attributed to acceleration of decarboxylation of the 3-chlorobenzoyloxy radical **10** at elevated temperature (80 °C), which is supported by the formation of **17c** in higher yield in the nickel-free reaction (~50%, Table S7) than in the Ni-catalyzed reaction (~20%, Table S6).

**Table S6. Results of Ni-catalyzed Bromination of 16 by *m*CPBA**

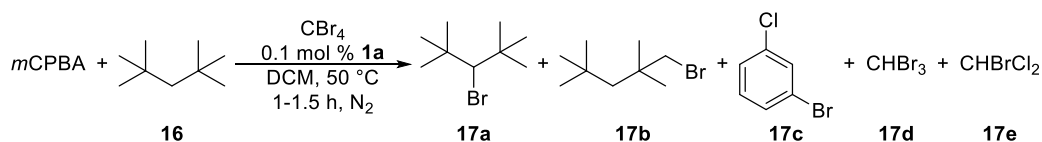

| Entry | <b>17a</b> (%) | <b>17b</b> (%) | 2°/1° | <b>17c</b> (%) | <b>17d</b> (%) | <b>17e</b> (%) |
|-------|----------------|----------------|-------|----------------|----------------|----------------|
| 1     | 35.0           | 18.9           | 1.9   | 17             | 13.7           | 55             |
| 2     | 36.4           | 18.6           | 2.0   | 19             | 14.2           | 56             |
| 3     | 34.3           | 16.3           | 2.1   | 19             | 11.5           | 54             |

**Table S7. Results of Bromination of 16 by Peroxide 15**

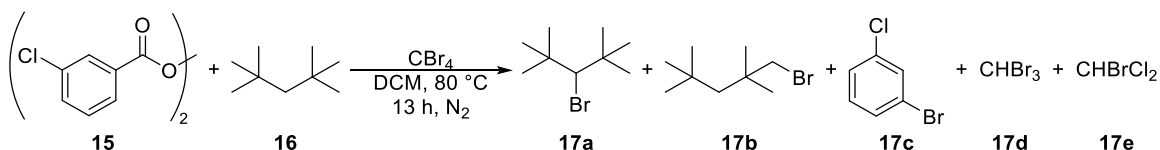

| Entry | <b>17a</b> (%) | <b>17b</b> (%) | 2°/1° | <i>m</i> CBA (%) | <b>17c</b> (%) | <b>17d</b> (%) | <b>17e</b> (%) |
|-------|----------------|----------------|-------|------------------|----------------|----------------|----------------|
| 1     | 7.0            | 5.5            | 1.3   | 47               | 50             | 130            | 120            |
| 2     | 13.5           | 6.5            | 2.1   | 43               | 50             | 131            | 123            |
| 3     | 10.7           | 5.0            | 2.1   | 44               | 50             | 134            | 118            |
| 4     | 11.5           | 5.6            | 2.1   | 38               | 52             | 132            | 110            |
| 5     | 10.5           | 5.3            | 2.0   | 41               | 50             | 125            | 100            |
| 6     | 11.6           | 4.7            | 2.5   | 39               | 48             | 131            | 115            |
| 7     | 6.7            | 5.7            | 1.2   | 44               | 49             | 123            | 110            |
| 8     | 11.9           | 5.5            | 2.2   | 41               | 49             | 128            | 109            |

In the Ni-catalyzed reactions, tribromomethyl radical (CBr<sub>3</sub>·) cannot be the major species that cleaves C–H bonds in alkane **16** (eq S2) because byproduct **17d** was formed in only 11%-15% yield, which is much lower than the yield of products **17a** and **17b** (Table S6). The large amount of **17d** and **17e** formed in the

nickel-free reaction (Table S7) can be explained by a radical chain pathway that would occur at elevated temperature (eq S3-S4).

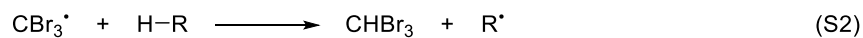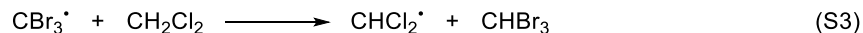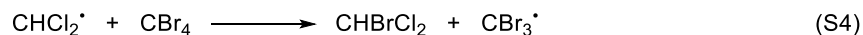

Bromine radical ( $\text{Br}^\cdot$ ) cannot be the major species that cleaves C–H bonds, because the solutions of both Ni-catalyzed and Ni-free reactions were either colorless or very slightly orange, indicating that  $\text{Br}_2$  was either not formed or formed in only trace amount. In addition, the selectivity of  $\text{Br}^\cdot$  for the secondary C–H bonds in the photo-mediated reaction of **16** and  $\text{Br}_2$  was high ( $2^\circ/1^\circ$  ratio = 31, Figure S21). This ratio, which is much larger than those presented in Tables S6 and S7, suggests that  $\text{Br}^\cdot$  does not cleave the C–H bonds in **16** in these reactions. Thus, we have demonstrated that radicals such as  $\text{Br}^\cdot$  and  $\text{CBr}_3^\cdot$  do not interfere with abstraction of hydrogen atoms from substrate **16**.

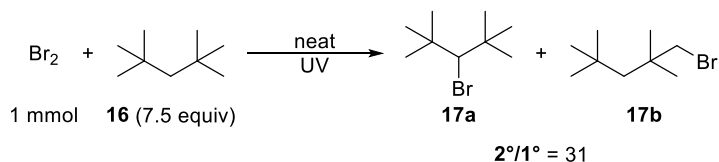

**Figure S21.** Photoinduced bromination of **16** by  $\text{Br}_2$ .

Bromination of adamantane (**3**) with substoichiometric amounts (10 mol % with respect to  $\text{CBr}_4$ ) of *m*CPBA and catalytic amounts of Ni complex **1a** was conducted under an atmosphere of  $\text{N}_2$  or air (Table S8) to assess whether  $\text{CBr}_3^\cdot$  or  $\text{Br}^\cdot$  cleaves the C–H bonds in adamantane. 1- and 2-bromoadamantane (**5f** and **5g**) were formed as the major products. The formation of the combination of **5f** and **5g** in higher than 10% yield in the reactions under air, along with the orange color of the reaction mixture (Table S8, Entries 1-2) suggests that  $\text{Br}^\cdot$  abstracts hydrogen atoms from adamantane in reactions conducted under air. The formation of the combination of **5f** and **5g** in approximately 30% yield in the reactions under nitrogen, the formation of bromoform (**17d**), and the colorlessness of the reaction mixture (Table S8, Entries 3-4) indicate that  $\text{CBr}_3^\cdot$  abstracts hydrogen atoms from adamantane in reactions conducted under nitrogen. Due to such



interference from  $\text{CBr}_3\cdot$  and  $\text{Br}\cdot$  in hydrogen-atom abstraction, adamantane is not a suitable substrate for the measurement of the selectivity of aryloxy radical **10**.

**Table S8. Results of Bromination of Adamantane**

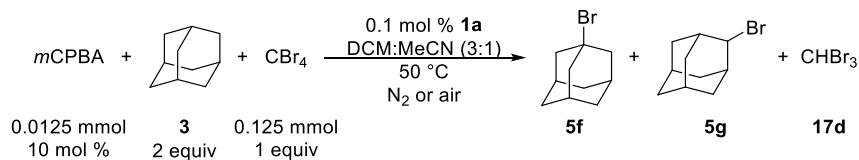

| Entry | N <sub>2</sub> or air | <b>5f</b> (%) | <b>5g</b> (%) | <b>17d</b> (%) | Color of reaction mixture |
|-------|-----------------------|---------------|---------------|----------------|---------------------------|
| 1     | Air                   | 12.0          | 2.0           | 0              | Orange                    |
| 2     | Air                   | 9.8           | 1.6           | 0              | Orange                    |
| 3     | N <sub>2</sub>        | 24.6          | 2.1           | 14             | Colorless                 |
| 4     | N <sub>2</sub>        | 27.2          | 2.3           | 18             | Colorless                 |

All yields were determined based on  $\text{CBr}_4$ .

Results of three repeated experiments of Ni-catalyzed bromination of **16** by aromatic peracid **18**, along with those of a control experiment conducted in the absence of Ni, are summarized in Table S9.

**Table S9. Results of Ni-catalyzed Bromination of 16 by peracid 18**

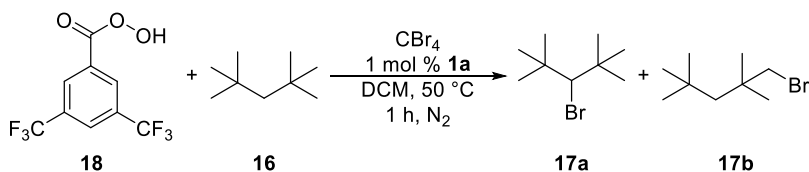

| Entry          | <b>17a</b> (%) | <b>17b</b> (%) | 2°/1° |
|----------------|----------------|----------------|-------|
| 1              | 14.3           | 13.5           | 1.1   |
| 2              | 15.6           | 13.5           | 1.2   |
| 3              | 14.2           | 13.1           | 1.1   |
| 4 <sup>a</sup> | 0              | 0              | -     |

<sup>a</sup>In the absence of Ni.

## 12. Assay for the Alkylperoxy Intermediate by GC

### 11.1. General procedure for the assay for alkylperoxy intermediates by GC

To a set of two 4 mL vials, each equipped with a stir bar, was added *m*CPBA (28.8 mg, 0.125 mmol, ~75% purity), alkane **2** (7.50 equiv) and a mixture of dichloromethane and acetonitrile (3:1 v/v, 1.0 mL) as solvent.

Ni complex **1a** was added as a suspension in DCM. One of these two vials was sparged with N<sub>2</sub> for 30-60 s before both were sealed and heated at 50 °C for 5 min. After cooling to room temperature, half of the reaction mixture in each vial was transferred to a clean GC vial, diluted with ethyl acetate, and immediately subjected to analysis by GC. The remaining mixture in each vial was treated with PPh<sub>3</sub> (18.1 mg, 0.0700 mmol), diluted with ethyl acetate, and then subjected to analysis by GC.

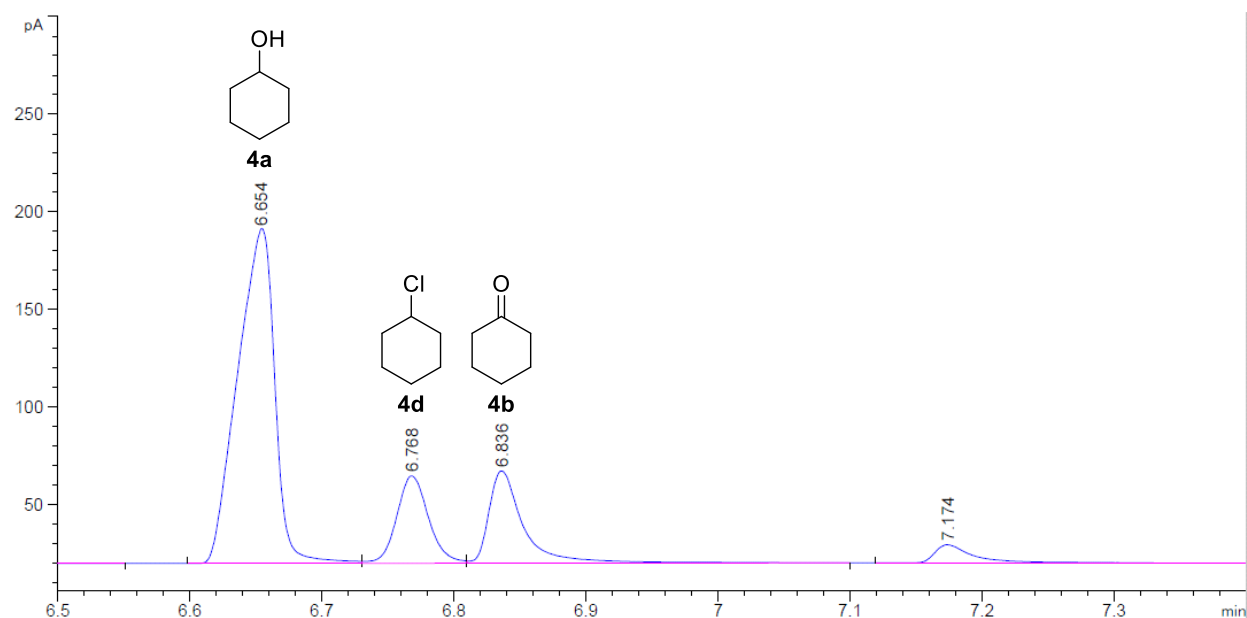

**Figure S22.** A typical GC trace of the reaction mixture from Ni-catalyzed oxidation of **2** after 5 min.

### 11.2. Results and derivation of the percentage of alkylperoxy intermediate **19**

**Table S10. Results of the Assay for Alkylperoxy Intermediate **19****

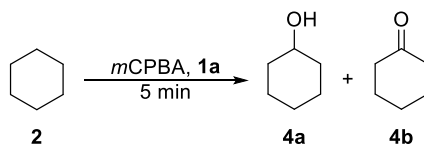

| Entry | N <sub>2</sub> /air | Treatment with PPh <sub>3</sub> | A/K <sup>a</sup> | Average A/K |
|-------|---------------------|---------------------------------|------------------|-------------|
| 1     | N <sub>2</sub>      | yes                             | 4.5              | 4.6±0.1     |
| 2     |                     |                                 | 4.6              |             |
| 3     |                     |                                 | 4.6              |             |
| 4     |                     | no                              | 4.5              |             |
| 5     |                     |                                 | 4.5              |             |
| 6     |                     |                                 | 4.5              |             |
| 7     | air                 | yes                             | 6.8              | 6.1±0.8     |

|    |  |    |     |         |
|----|--|----|-----|---------|
| 8  |  |    | 5.2 |         |
| 9  |  |    | 6.2 |         |
| 10 |  | no | 4.5 | 4.2±0.7 |
| 11 |  |    | 3.4 |         |
| 12 |  |    | 4.8 |         |

Results of the assay for intermediate **19** in Ni-catalyzed oxidation of **2** by GC before and after addition of PPh<sub>3</sub> are summarized in Table S10. All reactions were repeated three times and the average A/K ratio was calculated as the arithmetic mean of the ratios from the three reactions. The derivation of the percentage of **19** in the total amount of oxidized products is presented in Scheme S1. The ratio of alcohol **4a** in the total amount of oxidized products is assumed to be  $x$  and that of ketone **4b** is assumed to be  $y$ ; in this case the ratio of intermediate **19** would be  $1-x-y$ . Because intermediate **19** decomposes in the GC to afford **4a** and **4b** in roughly 1:1 ratio, eq S5 can be established based on experimental data from Table S10, Entries 10-12. Because treatment of **19** with PPh<sub>3</sub> results in quantitative formation of **4a**, eq S6 can be established based on data from Table S10, Entries 7-9. Solving for equations S5, S6 gives  $x = 76%$ ,  $y = 14%$ , and  $1-x-y = 10%$ , indicating that intermediate **19** only accounts for 10% of the total amount of oxidized products and that trapping of alkyl radicals by O<sub>2</sub> is not the major pathway for the formation of C–O bonds.

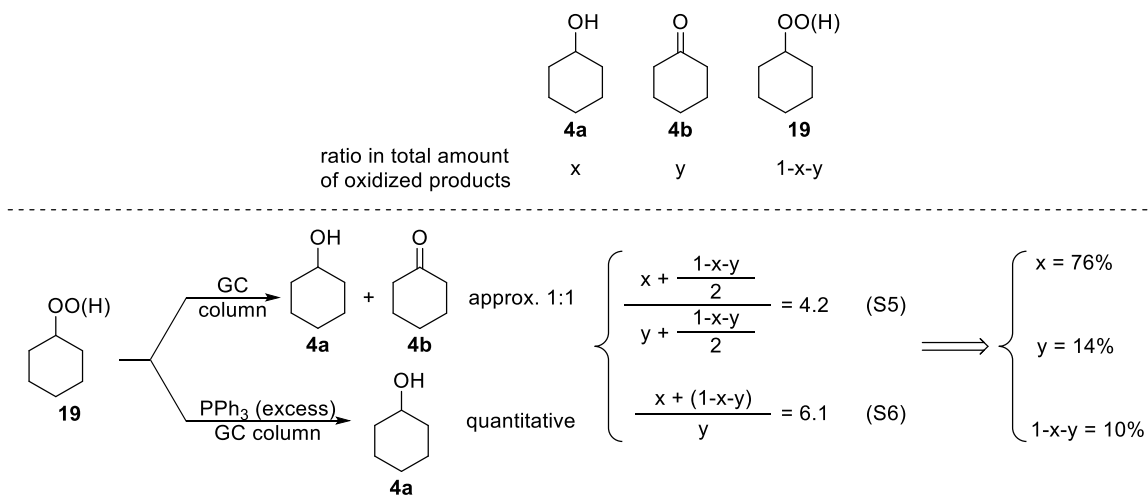

**Scheme S1.** Derivation of the percentage of **19** in the total amount of oxidized products.

## 13. References

1. Bunescu, A.; Lee, S. W.; Li, Q.; Hartwig, J. F., Catalytic Hydroxylation of Polyethylenes. *ACS Cent. Sci.* **2017**, *3*, 895-903.
2. Nagataki, T.; Tachi, Y.; Itoh, S., NiII(TPA) as an efficient catalyst for alkane hydroxylation with m-CPBA. *Chem. Commun.* **2006**, 4016-4018.
3. Khnayzer, R. S.; Thoi, V. S.; Nippe, M.; King, A. E.; Jurss, J. W.; El Roz, K. A.; Long, J. R.; Chang, C. J.; Castellano, F. N., Towards a comprehensive understanding of visible-light photogeneration of hydrogen from water using cobalt(ii) polypyridyl catalysts. *Energy & Environmental Science* **2014**, *7*, 1477-1488.
4. Pfaff, F. F.; Heims, F.; Kundu, S.; Mebs, S.; Ray, K., Spectroscopic capture and reactivity of S = 1/2 nickel(III)-oxygen intermediates in the reaction of a Ni(II)-salt with mCPBA. *Chem. Commun.* **2012**, *48*, 3730-3732.
5. Corona, T.; Pfaff, F. F.; Acuna-Pares, F.; Draksharapu, A.; Whiteoak, C. J.; Martin-Diaconescu, V.; Lloret-Fillol, J.; Browne, W. R.; Ray, K.; Company, A., Reactivity of a Nickel(II) Bis(amidate) Complex with meta-Chloroperbenzoic Acid: Formation of a Potent Oxidizing Species. *Chem. Eur. J.* **2015**, *21*, 15029-15038.
6. Corona, T.; Draksharapu, A.; Padamati, S. K.; Gamba, I.; Martin-Diaconescu, V.; Acuna-Pares, F.; Browne, W. R.; Company, A., Rapid Hydrogen and Oxygen Atom Transfer by a High-Valent Nickel-Oxygen Species. *J. Am. Chem. Soc.* **2016**, *138*, 12987-12996.
7. Yu, W.-Y.; Sit, W. N.; Zhou, Z.; Chan, A. S. C., Palladium-Catalyzed Decarboxylative Arylation of C-H Bonds by Aryl Acylperoxides. *Org. Lett.* **2009**, *11*, 3174-3177.
8. Mayer, R. J.; Tokuyasu, T.; Mayer, P.; Gomar, J.; Sabelle, S.; Mennucci, B.; Mayr, H.; Ofial, A. R., Solvation Accounts for the Counterintuitive Nucleophilicity Ordering of Peroxide Anions. *Angew. Chem. Int. Ed.* **2017**, *56*, 13279-13282.

## 14. X-ray Crystallographic Data

### 13.1. Ni(Me<sub>4</sub>Phen)<sub>2</sub>Cl<sub>2</sub> (**1a**)

A light blue block 0.23 x 0.14 x 0.07 mm in size was mounted on a Cryoloop with Paratone oil. Data were collected in a nitrogen gas stream at 100(2) K using omega scans. Crystal-to-detector distance was 30.23 mm and exposure time was 0.50 seconds per frame at low angles and 1.50 seconds per frame at high angles, using a scan width of 0.5°. Data collection was 100% complete to 74.000° in  $\theta$ . A total of 37258 reflections were collected covering the indices  $-14 \leq h \leq 14$ ,  $-20 \leq k \leq 32$ ,  $-15 \leq l \leq 15$ . 6886 reflections were found to be symmetry independent, with an  $R_{\text{int}}$  of 0.0585. Indexing and unit cell refinement indicated a primitive, monoclinic lattice. The space group was found to be P 21/c (No. 14). The data were integrated using the CrysAlis<sup>Pro</sup> 1.171.40.50a software program and scaled using the SCALE3 ABSPACK scaling algorithm. Solution by intrinsic phasing (SHELXT-2015) produced a heavy-atom phasing model consistent with the

proposed structure. All non-hydrogen atoms were refined anisotropically by full-matrix least-squares (SHELXL-2014). All hydrogen atoms were placed using a riding model. Their positions were constrained relative to their parent atom using the appropriate HFIX command in SHELXL-2014. Electron density most likely corresponding to one or (possibly) more highly disordered methanol molecules was masked using the SQUEEZE function.

Table 1. Crystal data and structure refinement for Yehao003\_Hartwig.

|                                   |                                                                   |                  |
|-----------------------------------|-------------------------------------------------------------------|------------------|
| Identification code               | Yehao003_Hartwig                                                  |                  |
| Empirical formula                 | C <sub>34</sub> H <sub>35</sub> Cl <sub>2</sub> N <sub>5</sub> Ni |                  |
| Formula weight                    | 643.28                                                            |                  |
| Temperature                       | 100(2) K                                                          |                  |
| Wavelength                        | 1.54184 Å                                                         |                  |
| Crystal system                    | Monoclinic                                                        |                  |
| Space group                       | P 21/c                                                            |                  |
| Unit cell dimensions              | a = 11.4248(2) Å                                                  | α = 90°.         |
|                                   | b = 25.6713(3) Å                                                  | β = 115.298(2)°. |
|                                   | c = 12.7082(2) Å                                                  | γ = 90°.         |
| Volume                            | 3369.73(10) Å <sup>3</sup>                                        |                  |
| Z                                 | 4                                                                 |                  |
| Density (calculated)              | 1.268 Mg/m <sup>3</sup>                                           |                  |
| Absorption coefficient            | 2.515 mm <sup>-1</sup>                                            |                  |
| F(000)                            | 1344                                                              |                  |
| Crystal size                      | 0.230 x 0.140 x 0.070 mm <sup>3</sup>                             |                  |
| Theta range for data collection   | 3.443 to 74.502°.                                                 |                  |
| Index ranges                      | -14 ≤ h ≤ 14, -20 ≤ k ≤ 32, -15 ≤ l ≤ 15                          |                  |
| Reflections collected             | 37258                                                             |                  |
| Independent reflections           | 6886 [R(int) = 0.0585]                                            |                  |
| Completeness to theta = 74.000°   | 100.0 %                                                           |                  |
| Absorption correction             | Semi-empirical from equivalents                                   |                  |
| Max. and min. transmission        | 1.00000 and 0.78221                                               |                  |
| Refinement method                 | Full-matrix least-squares on F <sup>2</sup>                       |                  |
| Data / restraints / parameters    | 6886 / 0 / 388                                                    |                  |
| Goodness-of-fit on F <sup>2</sup> | 1.067                                                             |                  |

|                                      |                                    |
|--------------------------------------|------------------------------------|
| Final R indices [ $I > 2\sigma(I)$ ] | R1 = 0.0427, wR2 = 0.1227          |
| R indices (all data)                 | R1 = 0.0461, wR2 = 0.1252          |
| Extinction coefficient               | n/a                                |
| Largest diff. peak and hole          | 0.415 and -0.493 e.Å <sup>-3</sup> |

Table 2. Atomic coordinates ( $\times 10^4$ ) and equivalent isotropic displacement parameters ( $\text{Å}^2 \times 10^3$ ) for yehao003\_hartwig.  $U(\text{eq})$  is defined as one third of the trace of the orthogonalized  $U^{ij}$  tensor.

|       | x       | y       | z        | U(eq) |
|-------|---------|---------|----------|-------|
| C(1)  | 5031(2) | 3761(1) | 9766(2)  | 28(1) |
| C(2)  | 5628(2) | 3474(1) | 10803(2) | 31(1) |
| C(3)  | 6313(2) | 3761(1) | 11933(2) | 41(1) |
| C(4)  | 5569(2) | 2934(1) | 10745(2) | 32(1) |
| C(5)  | 6226(2) | 2609(1) | 11828(2) | 43(1) |
| C(6)  | 4879(2) | 2699(1) | 9641(2)  | 31(1) |
| C(7)  | 4715(2) | 2145(1) | 9461(2)  | 38(1) |
| C(8)  | 4024(2) | 1938(1) | 8395(2)  | 39(1) |
| C(9)  | 3429(2) | 2258(1) | 7376(2)  | 35(1) |
| C(10) | 2711(2) | 2060(1) | 6236(2)  | 38(1) |
| C(11) | 2513(3) | 1483(1) | 6011(3)  | 50(1) |
| C(12) | 2198(2) | 2412(1) | 5326(2)  | 38(1) |
| C(13) | 1423(3) | 2246(1) | 4092(2)  | 53(1) |
| C(14) | 2396(2) | 2948(1) | 5579(2)  | 34(1) |
| C(15) | 3576(2) | 2801(1) | 7525(2)  | 29(1) |
| C(16) | 4308(2) | 3021(1) | 8660(2)  | 27(1) |
| C(17) | 1220(2) | 4341(1) | 4879(2)  | 28(1) |
| C(18) | 690(2)  | 4561(1) | 3761(2)  | 30(1) |
| C(19) | -733(2) | 4672(1) | 3186(2)  | 36(1) |
| C(20) | 1510(2) | 4668(1) | 3234(2)  | 29(1) |
| C(21) | 989(2)  | 4917(1) | 2052(2)  | 38(1) |
| C(22) | 2841(2) | 4534(1) | 3842(2)  | 27(1) |
| C(23) | 3801(2) | 4619(1) | 3408(2)  | 29(1) |
| C(24) | 5054(2) | 4476(1) | 4015(2)  | 30(1) |
| C(25) | 5498(2) | 4232(1) | 5134(2)  | 28(1) |

|       |         |         |         |       |
|-------|---------|---------|---------|-------|
| C(26) | 6794(2) | 4066(1) | 5793(2) | 30(1) |
| C(27) | 7782(2) | 4132(1) | 5311(2) | 37(1) |
| C(28) | 7108(2) | 3841(1) | 6878(2) | 31(1) |
| C(29) | 8424(2) | 3628(1) | 7644(2) | 40(1) |
| C(30) | 6125(2) | 3797(1) | 7267(2) | 28(1) |
| C(31) | 4592(2) | 4156(1) | 5595(2) | 26(1) |
| C(32) | 3262(2) | 4307(1) | 4946(2) | 25(1) |
| C(33) | 7637(3) | 4640(1) | 9978(2) | 53(1) |
| C(34) | 7239(3) | 5159(1) | 9999(2) | 50(1) |
| Cl(1) | 1448(1) | 3914(1) | 7469(1) | 32(1) |
| Cl(2) | 4022(1) | 4795(1) | 7903(1) | 30(1) |
| N(1)  | 4394(2) | 3550(1) | 8729(1) | 25(1) |
| N(2)  | 3054(2) | 3143(1) | 6632(2) | 28(1) |
| N(3)  | 2455(2) | 4216(1) | 5465(1) | 26(1) |
| N(4)  | 4916(2) | 3943(1) | 6662(1) | 25(1) |
| N(5)  | 7996(3) | 4215(1) | 9981(2) | 74(1) |
| Ni(1) | 3374(1) | 3930(1) | 7150(1) | 24(1) |

Table 3. Bond lengths [ $\text{\AA}$ ] and angles [ $^\circ$ ] for yehao003\_hartwig.

---

|            |          |
|------------|----------|
| C(1)-N(1)  | 1.319(2) |
| C(1)-C(2)  | 1.406(3) |
| C(1)-H(1)  | 0.9500   |
| C(2)-C(4)  | 1.387(3) |
| C(2)-C(3)  | 1.504(3) |
| C(3)-H(3A) | 0.9800   |
| C(3)-H(3B) | 0.9800   |
| C(3)-H(3C) | 0.9800   |
| C(4)-C(6)  | 1.418(3) |
| C(4)-C(5)  | 1.508(3) |
| C(5)-H(5A) | 0.9800   |
| C(5)-H(5B) | 0.9800   |
| C(5)-H(5C) | 0.9800   |
| C(6)-C(16) | 1.404(3) |
| C(6)-C(7)  | 1.439(3) |

|              |          |
|--------------|----------|
| C(7)-C(8)    | 1.351(3) |
| C(7)-H(7)    | 0.9500   |
| C(8)-C(9)    | 1.436(3) |
| C(8)-H(8)    | 0.9500   |
| C(9)-C(15)   | 1.407(3) |
| C(9)-C(10)   | 1.419(3) |
| C(10)-C(12)  | 1.385(3) |
| C(10)-C(11)  | 1.508(3) |
| C(11)-H(11A) | 0.9800   |
| C(11)-H(11B) | 0.9800   |
| C(11)-H(11C) | 0.9800   |
| C(12)-C(14)  | 1.408(3) |
| C(12)-C(13)  | 1.496(3) |
| C(13)-H(13A) | 0.9800   |
| C(13)-H(13B) | 0.9800   |
| C(13)-H(13C) | 0.9800   |
| C(14)-N(2)   | 1.322(3) |
| C(14)-H(14)  | 0.9500   |
| C(15)-N(2)   | 1.355(3) |
| C(15)-C(16)  | 1.437(3) |
| C(16)-N(1)   | 1.362(2) |
| C(17)-N(3)   | 1.322(2) |
| C(17)-C(18)  | 1.404(3) |
| C(17)-H(17)  | 0.9500   |
| C(18)-C(20)  | 1.391(3) |
| C(18)-C(19)  | 1.498(3) |
| C(19)-H(19A) | 0.9800   |
| C(19)-H(19B) | 0.9800   |
| C(19)-H(19C) | 0.9800   |
| C(20)-C(22)  | 1.423(3) |
| C(20)-C(21)  | 1.503(3) |
| C(21)-H(21A) | 0.9800   |
| C(21)-H(21B) | 0.9800   |
| C(21)-H(21C) | 0.9800   |
| C(22)-C(32)  | 1.400(3) |
| C(22)-C(23)  | 1.439(3) |



|                |            |
|----------------|------------|
| C(23)-C(24)    | 1.354(3)   |
| C(23)-H(23)    | 0.9500     |
| C(24)-C(25)    | 1.433(3)   |
| C(24)-H(24)    | 0.9500     |
| C(25)-C(31)    | 1.405(3)   |
| C(25)-C(26)    | 1.419(3)   |
| C(26)-C(28)    | 1.392(3)   |
| C(26)-C(27)    | 1.507(3)   |
| C(27)-H(27A)   | 0.9800     |
| C(27)-H(27B)   | 0.9800     |
| C(27)-H(27C)   | 0.9800     |
| C(28)-C(30)    | 1.411(3)   |
| C(28)-C(29)    | 1.502(3)   |
| C(29)-H(29A)   | 0.9800     |
| C(29)-H(29B)   | 0.9800     |
| C(29)-H(29C)   | 0.9800     |
| C(30)-N(4)     | 1.316(2)   |
| C(30)-H(30)    | 0.9500     |
| C(31)-N(4)     | 1.358(2)   |
| C(31)-C(32)    | 1.438(3)   |
| C(32)-N(3)     | 1.364(2)   |
| C(33)-N(5)     | 1.164(4)   |
| C(33)-C(34)    | 1.414(4)   |
| C(34)-H(34A)   | 0.9800     |
| C(34)-H(34B)   | 0.9800     |
| C(34)-H(34C)   | 0.9800     |
| Cl(1)-Ni(1)    | 2.4026(5)  |
| Cl(2)-Ni(1)    | 2.4056(5)  |
| N(1)-Ni(1)     | 2.0822(16) |
| N(2)-Ni(1)     | 2.1073(16) |
| N(3)-Ni(1)     | 2.0757(16) |
| N(4)-Ni(1)     | 2.1030(16) |
| N(1)-C(1)-C(2) | 124.14(17) |
| N(1)-C(1)-H(1) | 117.9      |
| C(2)-C(1)-H(1) | 117.9      |

|                     |            |
|---------------------|------------|
| C(4)-C(2)-C(1)      | 118.76(19) |
| C(4)-C(2)-C(3)      | 122.33(18) |
| C(1)-C(2)-C(3)      | 118.92(17) |
| C(2)-C(3)-H(3A)     | 109.5      |
| C(2)-C(3)-H(3B)     | 109.5      |
| H(3A)-C(3)-H(3B)    | 109.5      |
| C(2)-C(3)-H(3C)     | 109.5      |
| H(3A)-C(3)-H(3C)    | 109.5      |
| H(3B)-C(3)-H(3C)    | 109.5      |
| C(2)-C(4)-C(6)      | 118.17(18) |
| C(2)-C(4)-C(5)      | 120.75(19) |
| C(6)-C(4)-C(5)      | 121.08(18) |
| C(4)-C(5)-H(5A)     | 109.5      |
| C(4)-C(5)-H(5B)     | 109.5      |
| H(5A)-C(5)-H(5B)    | 109.5      |
| C(4)-C(5)-H(5C)     | 109.5      |
| H(5A)-C(5)-H(5C)    | 109.5      |
| H(5B)-C(5)-H(5C)    | 109.5      |
| C(16)-C(6)-C(4)     | 118.61(17) |
| C(16)-C(6)-C(7)     | 117.46(19) |
| C(4)-C(6)-C(7)      | 123.93(18) |
| C(8)-C(7)-C(6)      | 121.8(2)   |
| C(8)-C(7)-H(7)      | 119.1      |
| C(6)-C(7)-H(7)      | 119.1      |
| C(7)-C(8)-C(9)      | 121.95(19) |
| C(7)-C(8)-H(8)      | 119.0      |
| C(9)-C(8)-H(8)      | 119.0      |
| C(15)-C(9)-C(10)    | 118.5(2)   |
| C(15)-C(9)-C(8)     | 117.5(2)   |
| C(10)-C(9)-C(8)     | 124.08(19) |
| C(12)-C(10)-C(9)    | 118.14(19) |
| C(12)-C(10)-C(11)   | 120.5(2)   |
| C(9)-C(10)-C(11)    | 121.4(2)   |
| C(10)-C(11)-H(11A)  | 109.5      |
| C(10)-C(11)-H(11B)  | 109.5      |
| H(11A)-C(11)-H(11B) | 109.5      |

|                     |            |
|---------------------|------------|
| C(10)-C(11)-H(11C)  | 109.5      |
| H(11A)-C(11)-H(11C) | 109.5      |
| H(11B)-C(11)-H(11C) | 109.5      |
| C(10)-C(12)-C(14)   | 118.5(2)   |
| C(10)-C(12)-C(13)   | 122.6(2)   |
| C(14)-C(12)-C(13)   | 118.9(2)   |
| C(12)-C(13)-H(13A)  | 109.5      |
| C(12)-C(13)-H(13B)  | 109.5      |
| H(13A)-C(13)-H(13B) | 109.5      |
| C(12)-C(13)-H(13C)  | 109.5      |
| H(13A)-C(13)-H(13C) | 109.5      |
| H(13B)-C(13)-H(13C) | 109.5      |
| N(2)-C(14)-C(12)    | 124.6(2)   |
| N(2)-C(14)-H(14)    | 117.7      |
| C(12)-C(14)-H(14)   | 117.7      |
| N(2)-C(15)-C(9)     | 122.94(19) |
| N(2)-C(15)-C(16)    | 116.45(16) |
| C(9)-C(15)-C(16)    | 120.61(18) |
| N(1)-C(16)-C(6)     | 122.48(18) |
| N(1)-C(16)-C(15)    | 116.83(17) |
| C(6)-C(16)-C(15)    | 120.68(17) |
| N(3)-C(17)-C(18)    | 124.19(18) |
| N(3)-C(17)-H(17)    | 117.9      |
| C(18)-C(17)-H(17)   | 117.9      |
| C(20)-C(18)-C(17)   | 118.58(18) |
| C(20)-C(18)-C(19)   | 122.76(18) |
| C(17)-C(18)-C(19)   | 118.65(18) |
| C(18)-C(19)-H(19A)  | 109.5      |
| C(18)-C(19)-H(19B)  | 109.5      |
| H(19A)-C(19)-H(19B) | 109.5      |
| C(18)-C(19)-H(19C)  | 109.5      |
| H(19A)-C(19)-H(19C) | 109.5      |
| H(19B)-C(19)-H(19C) | 109.5      |
| C(18)-C(20)-C(22)   | 118.31(17) |
| C(18)-C(20)-C(21)   | 120.33(18) |
| C(22)-C(20)-C(21)   | 121.36(18) |

|                     |            |
|---------------------|------------|
| C(20)-C(21)-H(21A)  | 109.5      |
| C(20)-C(21)-H(21B)  | 109.5      |
| H(21A)-C(21)-H(21B) | 109.5      |
| C(20)-C(21)-H(21C)  | 109.5      |
| H(21A)-C(21)-H(21C) | 109.5      |
| H(21B)-C(21)-H(21C) | 109.5      |
| C(32)-C(22)-C(20)   | 118.32(17) |
| C(32)-C(22)-C(23)   | 117.06(17) |
| C(20)-C(22)-C(23)   | 124.62(17) |
| C(24)-C(23)-C(22)   | 122.25(18) |
| C(24)-C(23)-H(23)   | 118.9      |
| C(22)-C(23)-H(23)   | 118.9      |
| C(23)-C(24)-C(25)   | 121.58(17) |
| C(23)-C(24)-H(24)   | 119.2      |
| C(25)-C(24)-H(24)   | 119.2      |
| C(31)-C(25)-C(26)   | 118.66(17) |
| C(31)-C(25)-C(24)   | 117.57(17) |
| C(26)-C(25)-C(24)   | 123.77(17) |
| C(28)-C(26)-C(25)   | 118.18(17) |
| C(28)-C(26)-C(27)   | 121.86(18) |
| C(25)-C(26)-C(27)   | 119.96(18) |
| C(26)-C(27)-H(27A)  | 109.5      |
| C(26)-C(27)-H(27B)  | 109.5      |
| H(27A)-C(27)-H(27B) | 109.5      |
| C(26)-C(27)-H(27C)  | 109.5      |
| H(27A)-C(27)-H(27C) | 109.5      |
| H(27B)-C(27)-H(27C) | 109.5      |
| C(26)-C(28)-C(30)   | 118.19(18) |
| C(26)-C(28)-C(29)   | 123.79(18) |
| C(30)-C(28)-C(29)   | 117.99(19) |
| C(28)-C(29)-H(29A)  | 109.5      |
| C(28)-C(29)-H(29B)  | 109.5      |
| H(29A)-C(29)-H(29B) | 109.5      |
| C(28)-C(29)-H(29C)  | 109.5      |
| H(29A)-C(29)-H(29C) | 109.5      |
| H(29B)-C(29)-H(29C) | 109.5      |

|                     |            |
|---------------------|------------|
| N(4)-C(30)-C(28)    | 124.52(18) |
| N(4)-C(30)-H(30)    | 117.7      |
| C(28)-C(30)-H(30)   | 117.7      |
| N(4)-C(31)-C(25)    | 122.53(17) |
| N(4)-C(31)-C(32)    | 116.87(16) |
| C(25)-C(31)-C(32)   | 120.60(17) |
| N(3)-C(32)-C(22)    | 122.77(17) |
| N(3)-C(32)-C(31)    | 116.33(16) |
| C(22)-C(32)-C(31)   | 120.90(17) |
| N(5)-C(33)-C(34)    | 178.3(3)   |
| C(33)-C(34)-H(34A)  | 109.5      |
| C(33)-C(34)-H(34B)  | 109.5      |
| H(34A)-C(34)-H(34B) | 109.5      |
| C(33)-C(34)-H(34C)  | 109.5      |
| H(34A)-C(34)-H(34C) | 109.5      |
| H(34B)-C(34)-H(34C) | 109.5      |
| C(1)-N(1)-C(16)     | 117.83(16) |
| C(1)-N(1)-Ni(1)     | 127.88(12) |
| C(16)-N(1)-Ni(1)    | 114.16(13) |
| C(14)-N(2)-C(15)    | 117.30(17) |
| C(14)-N(2)-Ni(1)    | 128.89(14) |
| C(15)-N(2)-Ni(1)    | 113.78(13) |
| C(17)-N(3)-C(32)    | 117.79(16) |
| C(17)-N(3)-Ni(1)    | 127.88(13) |
| C(32)-N(3)-Ni(1)    | 114.24(12) |
| C(30)-N(4)-C(31)    | 117.88(16) |
| C(30)-N(4)-Ni(1)    | 128.75(13) |
| C(31)-N(4)-Ni(1)    | 113.29(12) |
| N(3)-Ni(1)-N(1)     | 171.22(6)  |
| N(3)-Ni(1)-N(4)     | 78.96(6)   |
| N(1)-Ni(1)-N(4)     | 95.60(6)   |
| N(3)-Ni(1)-N(2)     | 94.22(6)   |
| N(1)-Ni(1)-N(2)     | 78.67(6)   |
| N(4)-Ni(1)-N(2)     | 88.77(6)   |
| N(3)-Ni(1)-Cl(1)    | 94.81(5)   |
| N(1)-Ni(1)-Cl(1)    | 90.29(4)   |

|                   |            |
|-------------------|------------|
| N(4)-Ni(1)-Cl(1)  | 173.32(5)  |
| N(2)-Ni(1)-Cl(1)  | 89.28(5)   |
| N(3)-Ni(1)-Cl(2)  | 90.98(4)   |
| N(1)-Ni(1)-Cl(2)  | 95.63(4)   |
| N(4)-Ni(1)-Cl(2)  | 87.03(4)   |
| N(2)-Ni(1)-Cl(2)  | 172.57(5)  |
| Cl(1)-Ni(1)-Cl(2) | 95.563(19) |

---

Symmetry transformations used to generate equivalent atoms:

Table 4. Anisotropic displacement parameters ( $\text{\AA}^2 \times 10^3$ ) for yehao003\_hartwig. The anisotropic displacement factor exponent takes the form:  $-2\pi^2 [ h^2 a^{*2} U^{11} + \dots + 2 h k a^* b^* U^{12} ]$

|       | U <sup>11</sup> | U <sup>22</sup> | U <sup>33</sup> | U <sup>23</sup> | U <sup>13</sup> | U <sup>12</sup> |
|-------|-----------------|-----------------|-----------------|-----------------|-----------------|-----------------|
| C(1)  | 32(1)           | 23(1)           | 30(1)           | 1(1)            | 14(1)           | 1(1)            |
| C(2)  | 34(1)           | 28(1)           | 31(1)           | 2(1)            | 14(1)           | 2(1)            |
| C(3)  | 56(1)           | 32(1)           | 30(1)           | 2(1)            | 13(1)           | 0(1)            |
| C(4)  | 36(1)           | 28(1)           | 33(1)           | 6(1)            | 15(1)           | 2(1)            |
| C(5)  | 54(1)           | 32(1)           | 39(1)           | 10(1)           | 15(1)           | 4(1)            |
| C(6)  | 33(1)           | 24(1)           | 37(1)           | 3(1)            | 16(1)           | 1(1)            |
| C(7)  | 42(1)           | 24(1)           | 45(1)           | 5(1)            | 16(1)           | 1(1)            |
| C(8)  | 43(1)           | 22(1)           | 51(1)           | 1(1)            | 19(1)           | 0(1)            |
| C(9)  | 34(1)           | 27(1)           | 45(1)           | -4(1)           | 18(1)           | -2(1)           |
| C(10) | 35(1)           | 30(1)           | 49(1)           | -8(1)           | 17(1)           | -4(1)           |
| C(11) | 53(1)           | 30(1)           | 61(2)           | -12(1)          | 18(1)           | -5(1)           |
| C(12) | 37(1)           | 36(1)           | 41(1)           | -12(1)          | 17(1)           | -7(1)           |
| C(13) | 61(2)           | 48(1)           | 47(2)           | -16(1)          | 20(1)           | -13(1)          |
| C(14) | 35(1)           | 34(1)           | 31(1)           | -4(1)           | 13(1)           | -3(1)           |
| C(15) | 27(1)           | 24(1)           | 35(1)           | -1(1)           | 14(1)           | -1(1)           |
| C(16) | 28(1)           | 23(1)           | 34(1)           | 2(1)            | 16(1)           | 1(1)            |
| C(17) | 28(1)           | 28(1)           | 27(1)           | 1(1)            | 11(1)           | -1(1)           |
| C(18) | 30(1)           | 27(1)           | 30(1)           | 0(1)            | 11(1)           | 0(1)            |
| C(19) | 32(1)           | 41(1)           | 31(1)           | 5(1)            | 10(1)           | 3(1)            |
| C(20) | 35(1)           | 24(1)           | 26(1)           | 1(1)            | 10(1)           | -2(1)           |

|       |       |       |       |        |       |        |
|-------|-------|-------|-------|--------|-------|--------|
| C(21) | 39(1) | 41(1) | 31(1) | 8(1)   | 11(1) | -1(1)  |
| C(22) | 32(1) | 22(1) | 28(1) | 0(1)   | 13(1) | -4(1)  |
| C(23) | 40(1) | 25(1) | 28(1) | 1(1)   | 19(1) | -4(1)  |
| C(24) | 35(1) | 25(1) | 34(1) | -3(1)  | 20(1) | -5(1)  |
| C(25) | 32(1) | 23(1) | 31(1) | -5(1)  | 17(1) | -5(1)  |
| C(26) | 30(1) | 26(1) | 35(1) | -5(1)  | 17(1) | -5(1)  |
| C(27) | 32(1) | 44(1) | 40(1) | -3(1)  | 20(1) | -5(1)  |
| C(28) | 28(1) | 31(1) | 35(1) | -5(1)  | 14(1) | -3(1)  |
| C(29) | 29(1) | 49(1) | 44(1) | 2(1)   | 16(1) | 2(1)   |
| C(30) | 30(1) | 26(1) | 29(1) | -1(1)  | 13(1) | -1(1)  |
| C(31) | 29(1) | 20(1) | 29(1) | -2(1)  | 13(1) | -4(1)  |
| C(32) | 30(1) | 21(1) | 26(1) | 0(1)   | 15(1) | -3(1)  |
| C(33) | 55(2) | 68(2) | 37(1) | -12(1) | 21(1) | -17(1) |
| C(34) | 49(1) | 68(2) | 35(1) | -1(1)  | 19(1) | -1(1)  |
| Cl(1) | 29(1) | 36(1) | 36(1) | 8(1)   | 17(1) | 3(1)   |
| Cl(2) | 37(1) | 24(1) | 30(1) | 2(1)   | 15(1) | 0(1)   |
| N(1)  | 26(1) | 21(1) | 30(1) | 1(1)   | 14(1) | 1(1)   |
| N(2)  | 29(1) | 25(1) | 33(1) | -2(1)  | 14(1) | -2(1)  |
| N(3)  | 28(1) | 25(1) | 26(1) | -1(1)  | 12(1) | -2(1)  |
| N(4)  | 27(1) | 23(1) | 27(1) | -1(1)  | 12(1) | -2(1)  |
| N(5)  | 77(2) | 78(2) | 63(2) | -19(1) | 24(1) | -14(2) |
| Ni(1) | 25(1) | 23(1) | 25(1) | 2(1)   | 11(1) | 0(1)   |

Table 5. Hydrogen coordinates ( $\times 10^4$ ) and isotropic displacement parameters ( $\text{\AA}^2 \times 10^3$ ) for yehao003\_hartwig.

|       | x    | y    | z     | U(eq) |
|-------|------|------|-------|-------|
| H(1)  | 5090 | 4130 | 9816  | 34    |
| H(3A) | 6208 | 4137 | 11790 | 61    |
| H(3B) | 7236 | 3673 | 12276 | 61    |
| H(3C) | 5943 | 3661 | 12471 | 61    |
| H(5A) | 5678 | 2309 | 11793 | 64    |
| H(5B) | 6367 | 2820 | 12514 | 64    |

|        |       |      |       |    |
|--------|-------|------|-------|----|
| H(5C)  | 7061  | 2485 | 11882 | 64 |
| H(7)   | 5104  | 1918 | 10110 | 46 |
| H(8)   | 3928  | 1571 | 8318  | 47 |
| H(11A) | 1884  | 1355 | 6285  | 75 |
| H(11B) | 3339  | 1301 | 6426  | 75 |
| H(11C) | 2188  | 1416 | 5174  | 75 |
| H(13A) | 609   | 2088 | 4015  | 79 |
| H(13B) | 1918  | 1991 | 3873  | 79 |
| H(13C) | 1235  | 2550 | 3579  | 79 |
| H(14)  | 2031  | 3185 | 4948  | 41 |
| H(17)  | 656   | 4277 | 5238  | 33 |
| H(19A) | -872  | 5046 | 3032  | 54 |
| H(19B) | -1128 | 4562 | 3699  | 54 |
| H(19C) | -1130 | 4480 | 2450  | 54 |
| H(21A) | 1680  | 5115 | 1971  | 57 |
| H(21B) | 278   | 5153 | 1962  | 57 |
| H(21C) | 671   | 4646 | 1451  | 57 |
| H(23)  | 3547  | 4780 | 2671  | 35 |
| H(24)  | 5652  | 4539 | 3691  | 36 |
| H(27A) | 7630  | 3871 | 4703  | 56 |
| H(27B) | 8653  | 4085 | 5938  | 56 |
| H(27C) | 7706  | 4481 | 4980  | 56 |
| H(29A) | 8451  | 3529 | 8399  | 61 |
| H(29B) | 9081  | 3895 | 7760  | 61 |
| H(29C) | 8599  | 3322 | 7274  | 61 |
| H(30)  | 6353  | 3653 | 8017  | 34 |
| H(34A) | 6379  | 5213 | 9360  | 75 |
| H(34B) | 7858  | 5398 | 9907  | 75 |
| H(34C) | 7202  | 5227 | 10743 | 75 |

---

### 13.2. Ni(Brbpy)<sub>2</sub>Cl<sub>2</sub> (**1f**)

A green block 0.29 x 0.23 x 0.17 mm in size was mounted on a Cryoloop with Paratone oil. Data were collected in a nitrogen gas stream at 100(2) K using omega scans. Crystal-to-detector distance was 33.00 mm and exposure time was 1.00 seconds per frame at low and high angles using a scan width of 0.5°. Data



collection was 100% complete to 26.359° in  $\theta$ . A total of 24612 reflections were collected covering the indices  $-19 \leq h \leq 20$ ,  $-15 \leq k \leq 15$ ,  $-15 \leq l \leq 15$ . 2418 reflections were founded to be symmetry independent, with an  $R_{\text{int}}$  of 0.1056. Indexing and unit cell refinement indicated a centered, monoclinic lattice. The space group was found to be C 2/c (No. 15). The data were integrated using the CrysAlis<sup>Pro</sup> 1.171.40.79a software program and scaled using the SCALE3 ABSPACK scaling algorithm. Solution by intrinsic phasing (SHELXT-2015) produced a heavy-atom phasing model consistent with the proposed structure. All non-hydrogen atoms were refined anisotropically by full-matrix least-squares (SHELXL-2014). All hydrogen atoms were placed using a riding model. Their positions were constrained relative to their parent atom using the appropriate HFIX command in SHELXL-2014. Electron density attributable to outer sphere solvent (unidentifiable amongst the solvents used: methanol, acetonitrile and diethyl ether) was treated using the solvent mask option included within the OLEX2 software.

Table 1. Crystal data and structure refinement for Yehao005\_Hartwig.

|                                 |                                                                                   |                              |
|---------------------------------|-----------------------------------------------------------------------------------|------------------------------|
| Identification code             | Yehao005_Hartwig                                                                  |                              |
| Empirical formula               | C <sub>20</sub> H <sub>14</sub> Br <sub>2</sub> Cl <sub>2</sub> N <sub>4</sub> Ni |                              |
| Formula weight                  | 599.78                                                                            |                              |
| Temperature                     | 100(2) K                                                                          |                              |
| Wavelength                      | 0.71073 Å                                                                         |                              |
| Crystal system                  | Monoclinic                                                                        |                              |
| Space group                     | C 2/c                                                                             |                              |
| Unit cell dimensions            | a = 16.1864(6) Å                                                                  | $\alpha = 90^\circ$ .        |
|                                 | b = 12.0596(4) Å                                                                  | $\beta = 106.161(4)^\circ$ . |
|                                 | c = 12.6122(4) Å                                                                  | $\gamma = 90^\circ$ .        |
| Volume                          | 2364.63(15) Å <sup>3</sup>                                                        |                              |
| Z                               | 4                                                                                 |                              |
| Density (calculated)            | 1.685 Mg/m <sup>3</sup>                                                           |                              |
| Absorption coefficient          | 4.439 mm <sup>-1</sup>                                                            |                              |
| F(000)                          | 1176                                                                              |                              |
| Crystal size                    | 0.29 x 0.23 x 0.17 mm <sup>3</sup>                                                |                              |
| Theta range for data collection | 2.937 to 26.359°.                                                                 |                              |
| Index ranges                    | $-19 \leq h \leq 20$ , $-15 \leq k \leq 15$ , $-15 \leq l \leq 15$                |                              |

|                                   |                                             |
|-----------------------------------|---------------------------------------------|
| Reflections collected             | 24612                                       |
| Independent reflections           | 2418 [R(int) = 0.1056]                      |
| Completeness to theta = 26.359°   | 99.9 %                                      |
| Absorption correction             | Semi-empirical from equivalents             |
| Max. and min. transmission        | 1.00000 and 0.64989                         |
| Refinement method                 | Full-matrix least-squares on F <sup>2</sup> |
| Data / restraints / parameters    | 2418 / 0 / 132                              |
| Goodness-of-fit on F <sup>2</sup> | 1.267                                       |
| Final R indices [I>2sigma(I)]     | R1 = 0.0474, wR2 = 0.1174                   |
| R indices (all data)              | R1 = 0.0485, wR2 = 0.1179                   |
| Extinction coefficient            | n/a                                         |
| Largest diff. peak and hole       | 0.620 and -0.731 e.Å <sup>-3</sup>          |

Table 2. Atomic coordinates ( x 10<sup>4</sup>) and equivalent isotropic displacement parameters (Å<sup>2</sup>x 10<sup>3</sup>) for yehao005\_hartwig. U(eq) is defined as one third of the trace of the orthogonalized U<sup>ij</sup> tensor.

|       | x       | y       | z       | U(eq) |
|-------|---------|---------|---------|-------|
| C(1)  | 3634(3) | 4069(4) | 7438(4) | 14(1) |
| C(2)  | 2872(3) | 4634(5) | 6967(4) | 19(1) |
| C(3)  | 2502(3) | 4489(5) | 5854(5) | 21(1) |
| C(4)  | 2907(3) | 3825(4) | 5250(4) | 16(1) |
| C(5)  | 3663(3) | 3309(4) | 5802(4) | 12(1) |
| C(6)  | 4141(3) | 2597(4) | 5207(4) | 13(1) |
| C(7)  | 3894(4) | 2504(4) | 4055(4) | 21(1) |
| C(8)  | 4364(4) | 1851(4) | 3549(4) | 19(1) |
| C(9)  | 5074(4) | 1296(4) | 4195(4) | 20(1) |
| C(10) | 5289(3) | 1431(4) | 5327(4) | 16(1) |
| Br(1) | 4153(1) | 4346(1) | 8961(1) | 24(1) |
| Cl(1) | 3821(1) | 800(1)  | 7113(1) | 16(1) |
| N(1)  | 4020(3) | 3396(3) | 6911(3) | 13(1) |
| N(2)  | 4835(3) | 2068(3) | 5823(3) | 12(1) |
| Ni(1) | 5000    | 2124(1) | 7500    | 9(1)  |

Table 3. Bond lengths [Å] and angles [°] for yehao005\_hartwig.

---

|                 |            |
|-----------------|------------|
| C(1)-N(1)       | 1.313(6)   |
| C(1)-C(2)       | 1.389(7)   |
| C(1)-Br(1)      | 1.900(5)   |
| C(2)-C(3)       | 1.375(8)   |
| C(2)-H(2)       | 0.9500     |
| C(3)-C(4)       | 1.388(7)   |
| C(3)-H(3)       | 0.9500     |
| C(4)-C(5)       | 1.378(7)   |
| C(4)-H(4)       | 0.9500     |
| C(5)-N(1)       | 1.361(6)   |
| C(5)-C(6)       | 1.490(7)   |
| C(6)-N(2)       | 1.336(6)   |
| C(6)-C(7)       | 1.401(7)   |
| C(7)-C(8)       | 1.369(8)   |
| C(7)-H(7)       | 0.9500     |
| C(8)-C(9)       | 1.382(8)   |
| C(8)-H(8)       | 0.9500     |
| C(9)-C(10)      | 1.382(7)   |
| C(9)-H(9)       | 0.9500     |
| C(10)-N(2)      | 1.333(6)   |
| C(10)-H(10)     | 0.9500     |
| Cl(1)-Ni(1)     | 2.4318(13) |
| N(1)-Ni(1)      | 2.183(4)   |
| N(2)-Ni(1)      | 2.058(4)   |
| Ni(1)-N(2)#1    | 2.058(4)   |
| Ni(1)-N(1)#1    | 2.183(4)   |
| Ni(1)-Cl(1)#1   | 2.4318(13) |
|                 |            |
| N(1)-C(1)-C(2)  | 125.3(5)   |
| N(1)-C(1)-Br(1) | 118.8(4)   |
| C(2)-C(1)-Br(1) | 115.9(4)   |
| C(3)-C(2)-C(1)  | 117.2(5)   |
| C(3)-C(2)-H(2)  | 121.4      |
| C(1)-C(2)-H(2)  | 121.4      |

|                     |            |
|---------------------|------------|
| C(2)-C(3)-C(4)      | 119.7(5)   |
| C(2)-C(3)-H(3)      | 120.1      |
| C(4)-C(3)-H(3)      | 120.1      |
| C(5)-C(4)-C(3)      | 118.2(5)   |
| C(5)-C(4)-H(4)      | 120.9      |
| C(3)-C(4)-H(4)      | 120.9      |
| N(1)-C(5)-C(4)      | 123.2(4)   |
| N(1)-C(5)-C(6)      | 115.5(4)   |
| C(4)-C(5)-C(6)      | 121.3(4)   |
| N(2)-C(6)-C(7)      | 121.0(5)   |
| N(2)-C(6)-C(5)      | 116.9(4)   |
| C(7)-C(6)-C(5)      | 122.0(5)   |
| C(8)-C(7)-C(6)      | 119.6(5)   |
| C(8)-C(7)-H(7)      | 120.2      |
| C(6)-C(7)-H(7)      | 120.2      |
| C(7)-C(8)-C(9)      | 118.8(5)   |
| C(7)-C(8)-H(8)      | 120.6      |
| C(9)-C(8)-H(8)      | 120.6      |
| C(10)-C(9)-C(8)     | 118.8(5)   |
| C(10)-C(9)-H(9)     | 120.6      |
| C(8)-C(9)-H(9)      | 120.6      |
| N(2)-C(10)-C(9)     | 122.6(5)   |
| N(2)-C(10)-H(10)    | 118.7      |
| C(9)-C(10)-H(10)    | 118.7      |
| C(1)-N(1)-C(5)      | 116.3(4)   |
| C(1)-N(1)-Ni(1)     | 131.7(3)   |
| C(5)-N(1)-Ni(1)     | 110.8(3)   |
| C(10)-N(2)-C(6)     | 119.1(4)   |
| C(10)-N(2)-Ni(1)    | 124.7(3)   |
| C(6)-N(2)-Ni(1)     | 115.4(3)   |
| N(2)#1-Ni(1)-N(2)   | 176.2(2)   |
| N(2)#1-Ni(1)-N(1)   | 104.31(15) |
| N(2)-Ni(1)-N(1)     | 78.40(16)  |
| N(2)#1-Ni(1)-N(1)#1 | 78.40(16)  |
| N(2)-Ni(1)-N(1)#1   | 104.31(15) |
| N(1)-Ni(1)-N(1)#1   | 90.7(2)    |

|                      |            |
|----------------------|------------|
| N(2)#1-Ni(1)-Cl(1)   | 93.15(12)  |
| N(2)-Ni(1)-Cl(1)     | 84.37(11)  |
| N(1)-Ni(1)-Cl(1)     | 86.45(11)  |
| N(1)#1-Ni(1)-Cl(1)   | 170.14(11) |
| N(2)#1-Ni(1)-Cl(1)#1 | 84.37(11)  |
| N(2)-Ni(1)-Cl(1)#1   | 93.15(12)  |
| N(1)-Ni(1)-Cl(1)#1   | 170.14(11) |
| N(1)#1-Ni(1)-Cl(1)#1 | 86.45(11)  |
| Cl(1)-Ni(1)-Cl(1)#1  | 97.89(7)   |

---

Symmetry transformations used to generate equivalent atoms:

#1 -x+1,y,-z+3/2

Table 4. Anisotropic displacement parameters ( $\text{\AA}^2 \times 10^3$ ) for yehao005\_hartwig. The anisotropic displacement factor exponent takes the form:  $-2\pi^2 [ h^2 a^{*2} U^{11} + \dots + 2 h k a^* b^* U^{12} ]$

---

|       | U <sup>11</sup> | U <sup>22</sup> | U <sup>33</sup> | U <sup>23</sup> | U <sup>13</sup> | U <sup>12</sup> |
|-------|-----------------|-----------------|-----------------|-----------------|-----------------|-----------------|
| C(1)  | 12(2)           | 12(2)           | 16(2)           | -4(2)           | 3(2)            | -1(2)           |
| C(2)  | 14(2)           | 20(3)           | 24(3)           | -3(2)           | 6(2)            | 2(2)            |
| C(3)  | 10(2)           | 19(3)           | 30(3)           | 4(2)            | 1(2)            | 5(2)            |
| C(4)  | 13(2)           | 12(2)           | 19(2)           | -2(2)           | 0(2)            | -5(2)           |
| C(5)  | 12(2)           | 9(2)            | 12(2)           | -1(2)           | 0(2)            | -2(2)           |
| C(6)  | 15(2)           | 12(2)           | 11(2)           | 2(2)            | 0(2)            | -2(2)           |
| C(7)  | 30(3)           | 14(2)           | 12(2)           | -1(2)           | -5(2)           | -2(2)           |
| C(8)  | 35(3)           | 13(2)           | 10(2)           | -1(2)           | 6(2)            | -5(2)           |
| C(9)  | 34(3)           | 16(3)           | 16(2)           | -4(2)           | 16(2)           | 1(2)            |
| C(10) | 16(2)           | 16(2)           | 16(2)           | 0(2)            | 8(2)            | 2(2)            |
| Br(1) | 25(1)           | 28(1)           | 16(1)           | -9(1)           | 3(1)            | 12(1)           |
| Cl(1) | 14(1)           | 16(1)           | 16(1)           | 2(1)            | 1(1)            | -5(1)           |
| N(1)  | 11(2)           | 14(2)           | 12(2)           | -1(2)           | 3(2)            | -2(2)           |
| N(2)  | 14(2)           | 13(2)           | 12(2)           | -2(2)           | 7(2)            | -2(2)           |
| Ni(1) | 9(1)            | 9(1)            | 8(1)            | 0               | 2(1)            | 0               |

---

Table 5. Hydrogen coordinates ( $\times 10^4$ ) and isotropic displacement parameters ( $\text{\AA}^2 \times 10^3$ ) for yehao005\_hartwig.

|       | x    | y    | z    | U(eq) |
|-------|------|------|------|-------|
| H(2)  | 2618 | 5101 | 7395 | 23    |
| H(3)  | 1972 | 4841 | 5500 | 25    |
| H(4)  | 2668 | 3730 | 4478 | 19    |
| H(7)  | 3404 | 2893 | 3626 | 25    |
| H(8)  | 4205 | 1781 | 2768 | 23    |
| H(9)  | 5407 | 831  | 3867 | 24    |
| H(10) | 5780 | 1055 | 5770 | 19    |

Table 6. Torsion angles [ $^\circ$ ] for yehao005\_hartwig.

|                      |           |
|----------------------|-----------|
| N(1)-C(1)-C(2)-C(3)  | -1.1(8)   |
| Br(1)-C(1)-C(2)-C(3) | 177.1(4)  |
| C(1)-C(2)-C(3)-C(4)  | -1.9(8)   |
| C(2)-C(3)-C(4)-C(5)  | 1.6(8)    |
| C(3)-C(4)-C(5)-N(1)  | 1.7(7)    |
| C(3)-C(4)-C(5)-C(6)  | -179.1(5) |
| N(1)-C(5)-C(6)-N(2)  | 3.9(6)    |
| C(4)-C(5)-C(6)-N(2)  | -175.4(4) |
| N(1)-C(5)-C(6)-C(7)  | -174.3(5) |
| C(4)-C(5)-C(6)-C(7)  | 6.4(7)    |
| N(2)-C(6)-C(7)-C(8)  | 0.9(8)    |
| C(5)-C(6)-C(7)-C(8)  | 179.0(5)  |
| C(6)-C(7)-C(8)-C(9)  | 0.0(8)    |
| C(7)-C(8)-C(9)-C(10) | -0.7(8)   |
| C(8)-C(9)-C(10)-N(2) | 0.6(8)    |
| C(2)-C(1)-N(1)-C(5)  | 4.2(7)    |
| Br(1)-C(1)-N(1)-C(5) | -174.0(3) |

|                       |           |
|-----------------------|-----------|
| C(2)-C(1)-N(1)-Ni(1)  | -162.2(4) |
| Br(1)-C(1)-N(1)-Ni(1) | 19.6(6)   |
| C(4)-C(5)-N(1)-C(1)   | -4.4(7)   |
| C(6)-C(5)-N(1)-C(1)   | 176.3(4)  |
| C(4)-C(5)-N(1)-Ni(1)  | 164.7(4)  |
| C(6)-C(5)-N(1)-Ni(1)  | -14.5(5)  |
| C(9)-C(10)-N(2)-C(6)  | 0.3(8)    |
| C(9)-C(10)-N(2)-Ni(1) | 170.2(4)  |
| C(7)-C(6)-N(2)-C(10)  | -1.0(7)   |
| C(5)-C(6)-N(2)-C(10)  | -179.2(4) |
| C(7)-C(6)-N(2)-Ni(1)  | -171.8(4) |
| C(5)-C(6)-N(2)-Ni(1)  | 10.0(5)   |

---

Symmetry transformations used to generate equivalent atoms:

#1 -x+1,y,-z+3/2

### 13.3. Ni(bpyPY2Me)Cl<sub>2</sub> (**1g**)

A red block 0.43 x 0.31 x 0.24 mm in size was mounted on a Cryoloop with Paratone oil. Data were collected in a nitrogen gas stream at 100(2) K using omega scans. Crystal-to-detector distance was 33.00 mm and exposure time was 0.50 seconds per frame at low and high angles using a scan width of 0.5°. Data collection was 100% complete to 26.372° in  $\theta$ . A total of 23753 reflections were collected covering the indices  $-12 \leq h \leq 11$ ,  $-13 \leq k \leq 13$ ,  $-15 \leq l \leq 15$ . 4753 reflections were founded to be symmetry independent, with an  $R_{\text{int}}$  of 0.0873. Indexing and unit cell refinement indicated a primitive, triclinic lattice. The space group was found to be P -1 (No. 2). The data were integrated using the CrysAlis<sup>Pro</sup> 1.171.40.79a software program and scaled using the SCALE3 ABSPACK scaling algorithm. Solution by intrinsic phasing (SHELXT-2015) produced a heavy-atom phasing model consistent with the proposed structure. All non-hydrogen atoms were refined anisotropically by full-matrix least-squares (SHELXL-2014). All hydrogen atoms were placed using a riding model. Their positions were constrained relative to their parent atom using the appropriate HFIX command in SHELXL-2014.

Table 1. Crystal data and structure refinement for Yehao004\_Hartwig.

|                                   |                                                                                  |                  |
|-----------------------------------|----------------------------------------------------------------------------------|------------------|
| Identification code               | Yehao004_Hartwig                                                                 |                  |
| Empirical formula                 | C <sub>24</sub> H <sub>26</sub> Cl <sub>2</sub> N <sub>4</sub> Ni O <sub>2</sub> |                  |
| Formula weight                    | 532.10                                                                           |                  |
| Temperature                       | 100(2) K                                                                         |                  |
| Wavelength                        | 0.71073 Å                                                                        |                  |
| Crystal system                    | Triclinic                                                                        |                  |
| Space group                       | P -1                                                                             |                  |
| Unit cell dimensions              | a = 9.6088(2) Å                                                                  | α = 102.911(2)°. |
|                                   | b = 10.9517(3) Å                                                                 | β = 95.301(2)°.  |
|                                   | c = 12.2940(2) Å                                                                 | γ = 109.822(2)°. |
| Volume                            | 1166.19(5) Å <sup>3</sup>                                                        |                  |
| Z                                 | 2                                                                                |                  |
| Density (calculated)              | 1.515 Mg/m <sup>3</sup>                                                          |                  |
| Absorption coefficient            | 1.091 mm <sup>-1</sup>                                                           |                  |
| F(000)                            | 552                                                                              |                  |
| Crystal size                      | 0.43 x 0.31 x 0.24 mm <sup>3</sup>                                               |                  |
| Theta range for data collection   | 2.915 to 26.372°.                                                                |                  |
| Index ranges                      | -12 ≤ h ≤ 11, -13 ≤ k ≤ 13, -15 ≤ l ≤ 15                                         |                  |
| Reflections collected             | 23753                                                                            |                  |
| Independent reflections           | 4753 [R(int) = 0.0873]                                                           |                  |
| Completeness to theta = 26.372°   | 99.8 %                                                                           |                  |
| Absorption correction             | Semi-empirical from equivalents                                                  |                  |
| Max. and min. transmission        | 1.00000 and 0.71519                                                              |                  |
| Refinement method                 | Full-matrix least-squares on F <sup>2</sup>                                      |                  |
| Data / restraints / parameters    | 4753 / 0 / 309                                                                   |                  |
| Goodness-of-fit on F <sup>2</sup> | 1.101                                                                            |                  |
| Final R indices [I > 2σ(I)]       | R1 = 0.0352, wR2 = 0.0960                                                        |                  |
| R indices (all data)              | R1 = 0.0374, wR2 = 0.0974                                                        |                  |
| Extinction coefficient            | n/a                                                                              |                  |
| Largest diff. peak and hole       | 0.437 and -0.420 e.Å <sup>-3</sup>                                               |                  |

Table 2. Atomic coordinates ( x 10<sup>4</sup>) and equivalent isotropic displacement parameters (Å<sup>2</sup>x 10<sup>3</sup>) for yehao004\_hartwig. U(eq) is defined as one third of the trace of the orthogonalized U<sup>ij</sup> tensor.



|       | x       | y        | z        | U(eq) |
|-------|---------|----------|----------|-------|
| C(1)  | 2736(2) | 5517(2)  | 4843(2)  | 14(1) |
| C(2)  | 1795(2) | 4863(2)  | 3798(2)  | 16(1) |
| C(3)  | 665(2)  | 5300(2)  | 3500(2)  | 16(1) |
| C(4)  | 522(2)  | 6395(2)  | 4248(2)  | 14(1) |
| C(5)  | 1534(2) | 7031(2)  | 5270(1)  | 11(1) |
| C(6)  | 1546(2) | 8339(2)  | 6079(1)  | 12(1) |
| C(7)  | 281(2)  | 8735(2)  | 5598(2)  | 16(1) |
| C(8)  | 3107(2) | 9458(2)  | 6181(1)  | 12(1) |
| C(9)  | 3259(2) | 10596(2) | 5814(2)  | 16(1) |
| C(10) | 4688(2) | 11571(2) | 5940(2)  | 18(1) |
| C(11) | 5924(2) | 11386(2) | 6431(2)  | 18(1) |
| C(12) | 5701(2) | 10210(2) | 6751(2)  | 15(1) |
| C(13) | 1381(2) | 8213(2)  | 7288(1)  | 12(1) |
| C(14) | 277(2)  | 8491(2)  | 7846(2)  | 16(1) |
| C(15) | 350(2)  | 8507(2)  | 8981(2)  | 19(1) |
| C(16) | 1537(2) | 8333(2)  | 9570(2)  | 17(1) |
| C(17) | 2609(2) | 8084(2)  | 8969(2)  | 14(1) |
| C(18) | 4058(2) | 8077(2)  | 9500(2)  | 14(1) |
| C(19) | 4382(2) | 8124(2)  | 10633(2) | 19(1) |
| C(20) | 5795(2) | 8177(2)  | 11062(2) | 21(1) |
| C(21) | 6837(2) | 8182(2)  | 10357(2) | 22(1) |
| C(22) | 6411(2) | 8124(2)  | 9229(2)  | 21(1) |
| C(23) | 4128(3) | 4620(3)  | 7370(3)  | 44(1) |
| C(24) | 1820(3) | 4814(2)  | 9979(2)  | 39(1) |
| Cl(1) | 6199(1) | 7257(1)  | 6403(1)  | 16(1) |
| Cl(2) | -217(1) | 1665(1)  | 7801(1)  | 23(1) |
| N(1)  | 2617(2) | 6584(1)  | 5563(1)  | 11(1) |
| N(2)  | 4329(2) | 9269(1)  | 6637(1)  | 12(1) |
| N(3)  | 2467(2) | 7948(1)  | 7844(1)  | 11(1) |
| N(4)  | 5059(2) | 8073(2)  | 8802(1)  | 15(1) |
| Ni(1) | 4073(1) | 7492(1)  | 7079(1)  | 10(1) |
| O(1)  | 3299(2) | 5477(1)  | 7376(1)  | 19(1) |
| O(2)  | 1443(2) | 4666(2)  | 8806(1)  | 30(1) |

Table 3. Bond lengths [Å] and angles [°] for yehao004\_hartwig.

---

|             |          |
|-------------|----------|
| C(1)-N(1)   | 1.345(2) |
| C(1)-C(2)   | 1.385(3) |
| C(1)-H(1A)  | 0.9500   |
| C(2)-C(3)   | 1.378(3) |
| C(2)-H(2)   | 0.9500   |
| C(3)-C(4)   | 1.394(3) |
| C(3)-H(3)   | 0.9500   |
| C(4)-C(5)   | 1.391(2) |
| C(4)-H(4)   | 0.9500   |
| C(5)-N(1)   | 1.345(2) |
| C(5)-C(6)   | 1.546(2) |
| C(6)-C(7)   | 1.535(2) |
| C(6)-C(13)  | 1.541(2) |
| C(6)-C(8)   | 1.555(2) |
| C(7)-H(7A)  | 0.9800   |
| C(7)-H(7B)  | 0.9800   |
| C(7)-H(7C)  | 0.9800   |
| C(8)-N(2)   | 1.352(2) |
| C(8)-C(9)   | 1.385(3) |
| C(9)-C(10)  | 1.394(3) |
| C(9)-H(9)   | 0.9500   |
| C(10)-C(11) | 1.379(3) |
| C(10)-H(10) | 0.9500   |
| C(11)-C(12) | 1.384(3) |
| C(11)-H(11) | 0.9500   |
| C(12)-N(2)  | 1.342(2) |
| C(12)-H(12) | 0.9500   |
| C(13)-N(3)  | 1.342(2) |
| C(13)-C(14) | 1.396(2) |
| C(14)-C(15) | 1.387(3) |
| C(14)-H(14) | 0.9500   |
| C(15)-C(16) | 1.384(3) |

|                 |            |
|-----------------|------------|
| C(15)-H(15)     | 0.9500     |
| C(16)-C(17)     | 1.387(3)   |
| C(16)-H(16)     | 0.9500     |
| C(17)-N(3)      | 1.347(2)   |
| C(17)-C(18)     | 1.485(2)   |
| C(18)-N(4)      | 1.348(2)   |
| C(18)-C(19)     | 1.384(3)   |
| C(19)-C(20)     | 1.388(3)   |
| C(19)-H(19)     | 0.9500     |
| C(20)-C(21)     | 1.382(3)   |
| C(20)-H(20)     | 0.9500     |
| C(21)-C(22)     | 1.391(3)   |
| C(21)-H(21)     | 0.9500     |
| C(22)-N(4)      | 1.333(2)   |
| C(22)-H(22)     | 0.9500     |
| C(23)-O(1)      | 1.421(2)   |
| C(23)-H(23A)    | 0.9800     |
| C(23)-H(23B)    | 0.9800     |
| C(23)-H(23C)    | 0.9800     |
| C(24)-O(2)      | 1.413(3)   |
| C(24)-H(24A)    | 0.9800     |
| C(24)-H(24B)    | 0.9800     |
| C(24)-H(24C)    | 0.9800     |
| Cl(1)-Ni(1)     | 2.3463(4)  |
| N(1)-Ni(1)      | 2.0409(14) |
| N(2)-Ni(1)      | 2.0773(15) |
| N(3)-Ni(1)      | 2.0242(14) |
| N(4)-Ni(1)      | 2.0989(15) |
| Ni(1)-O(1)      | 2.2031(14) |
| O(1)-H(1)       | 0.87(3)    |
| O(2)-H(2A)      | 0.83(4)    |
|                 |            |
| N(1)-C(1)-C(2)  | 122.57(16) |
| N(1)-C(1)-H(1A) | 118.7      |
| C(2)-C(1)-H(1A) | 118.7      |
| C(3)-C(2)-C(1)  | 118.56(16) |

|                   |            |
|-------------------|------------|
| C(3)-C(2)-H(2)    | 120.7      |
| C(1)-C(2)-H(2)    | 120.7      |
| C(2)-C(3)-C(4)    | 119.23(16) |
| C(2)-C(3)-H(3)    | 120.4      |
| C(4)-C(3)-H(3)    | 120.4      |
| C(5)-C(4)-C(3)    | 119.23(16) |
| C(5)-C(4)-H(4)    | 120.4      |
| C(3)-C(4)-H(4)    | 120.4      |
| N(1)-C(5)-C(4)    | 121.19(15) |
| N(1)-C(5)-C(6)    | 116.75(14) |
| C(4)-C(5)-C(6)    | 121.92(15) |
| C(7)-C(6)-C(13)   | 109.36(14) |
| C(7)-C(6)-C(5)    | 110.04(14) |
| C(13)-C(6)-C(5)   | 112.86(14) |
| C(7)-C(6)-C(8)    | 110.49(14) |
| C(13)-C(6)-C(8)   | 106.77(13) |
| C(5)-C(6)-C(8)    | 107.27(13) |
| C(6)-C(7)-H(7A)   | 109.5      |
| C(6)-C(7)-H(7B)   | 109.5      |
| H(7A)-C(7)-H(7B)  | 109.5      |
| C(6)-C(7)-H(7C)   | 109.5      |
| H(7A)-C(7)-H(7C)  | 109.5      |
| H(7B)-C(7)-H(7C)  | 109.5      |
| N(2)-C(8)-C(9)    | 120.87(16) |
| N(2)-C(8)-C(6)    | 117.05(15) |
| C(9)-C(8)-C(6)    | 122.08(15) |
| C(8)-C(9)-C(10)   | 119.37(17) |
| C(8)-C(9)-H(9)    | 120.3      |
| C(10)-C(9)-H(9)   | 120.3      |
| C(11)-C(10)-C(9)  | 119.39(17) |
| C(11)-C(10)-H(10) | 120.3      |
| C(9)-C(10)-H(10)  | 120.3      |
| C(10)-C(11)-C(12) | 118.42(17) |
| C(10)-C(11)-H(11) | 120.8      |
| C(12)-C(11)-H(11) | 120.8      |
| N(2)-C(12)-C(11)  | 122.56(17) |

|                     |            |
|---------------------|------------|
| N(2)-C(12)-H(12)    | 118.7      |
| C(11)-C(12)-H(12)   | 118.7      |
| N(3)-C(13)-C(14)    | 120.12(16) |
| N(3)-C(13)-C(6)     | 116.02(14) |
| C(14)-C(13)-C(6)    | 123.52(15) |
| C(15)-C(14)-C(13)   | 118.43(16) |
| C(15)-C(14)-H(14)   | 120.8      |
| C(13)-C(14)-H(14)   | 120.8      |
| C(16)-C(15)-C(14)   | 121.02(17) |
| C(16)-C(15)-H(15)   | 119.5      |
| C(14)-C(15)-H(15)   | 119.5      |
| C(15)-C(16)-C(17)   | 117.47(16) |
| C(15)-C(16)-H(16)   | 121.3      |
| C(17)-C(16)-H(16)   | 121.3      |
| N(3)-C(17)-C(16)    | 121.47(16) |
| N(3)-C(17)-C(18)    | 114.06(15) |
| C(16)-C(17)-C(18)   | 124.20(16) |
| N(4)-C(18)-C(19)    | 122.44(17) |
| N(4)-C(18)-C(17)    | 114.68(15) |
| C(19)-C(18)-C(17)   | 122.84(17) |
| C(18)-C(19)-C(20)   | 118.48(18) |
| C(18)-C(19)-H(19)   | 120.8      |
| C(20)-C(19)-H(19)   | 120.8      |
| C(21)-C(20)-C(19)   | 119.72(17) |
| C(21)-C(20)-H(20)   | 120.1      |
| C(19)-C(20)-H(20)   | 120.1      |
| C(20)-C(21)-C(22)   | 117.87(18) |
| C(20)-C(21)-H(21)   | 121.1      |
| C(22)-C(21)-H(21)   | 121.1      |
| N(4)-C(22)-C(21)    | 123.26(19) |
| N(4)-C(22)-H(22)    | 118.4      |
| C(21)-C(22)-H(22)   | 118.4      |
| O(1)-C(23)-H(23A)   | 109.5      |
| O(1)-C(23)-H(23B)   | 109.5      |
| H(23A)-C(23)-H(23B) | 109.5      |
| O(1)-C(23)-H(23C)   | 109.5      |

|                     |            |
|---------------------|------------|
| H(23A)-C(23)-H(23C) | 109.5      |
| H(23B)-C(23)-H(23C) | 109.5      |
| O(2)-C(24)-H(24A)   | 109.5      |
| O(2)-C(24)-H(24B)   | 109.5      |
| H(24A)-C(24)-H(24B) | 109.5      |
| O(2)-C(24)-H(24C)   | 109.5      |
| H(24A)-C(24)-H(24C) | 109.5      |
| H(24B)-C(24)-H(24C) | 109.5      |
| C(1)-N(1)-C(5)      | 119.18(15) |
| C(1)-N(1)-Ni(1)     | 119.63(11) |
| C(5)-N(1)-Ni(1)     | 121.19(11) |
| C(12)-N(2)-C(8)     | 119.36(15) |
| C(12)-N(2)-Ni(1)    | 120.72(12) |
| C(8)-N(2)-Ni(1)     | 119.86(11) |
| C(13)-N(3)-C(17)    | 120.96(14) |
| C(13)-N(3)-Ni(1)    | 122.27(11) |
| C(17)-N(3)-Ni(1)    | 116.56(11) |
| C(22)-N(4)-C(18)    | 118.23(16) |
| C(22)-N(4)-Ni(1)    | 126.84(13) |
| C(18)-N(4)-Ni(1)    | 113.00(12) |
| N(3)-Ni(1)-N(1)     | 91.37(6)   |
| N(3)-Ni(1)-N(2)     | 81.62(6)   |
| N(1)-Ni(1)-N(2)     | 84.56(6)   |
| N(3)-Ni(1)-N(4)     | 78.19(6)   |
| N(1)-Ni(1)-N(4)     | 163.66(6)  |
| N(2)-Ni(1)-N(4)     | 106.00(6)  |
| N(3)-Ni(1)-O(1)     | 91.29(6)   |
| N(1)-Ni(1)-O(1)     | 85.67(5)   |
| N(2)-Ni(1)-O(1)     | 167.77(5)  |
| N(4)-Ni(1)-O(1)     | 82.06(6)   |
| N(3)-Ni(1)-Cl(1)    | 171.20(4)  |
| N(1)-Ni(1)-Cl(1)    | 96.40(4)   |
| N(2)-Ni(1)-Cl(1)    | 94.97(4)   |
| N(4)-Ni(1)-Cl(1)    | 95.08(4)   |
| O(1)-Ni(1)-Cl(1)    | 93.40(4)   |
| C(23)-O(1)-Ni(1)    | 126.91(14) |

|                  |           |
|------------------|-----------|
| C(23)-O(1)-H(1)  | 108.6(19) |
| Ni(1)-O(1)-H(1)  | 117.0(19) |
| C(24)-O(2)-H(2A) | 106(2)    |

---

Symmetry transformations used to generate equivalent atoms:

Table 4. Anisotropic displacement parameters ( $\text{\AA}^2 \times 10^3$ ) for yehao004\_hartwig. The anisotropic displacement factor exponent takes the form:  $-2\pi^2 [ h^2 a^{*2} U^{11} + \dots + 2 h k a^* b^* U^{12} ]$

|       | $U^{11}$ | $U^{22}$ | $U^{33}$ | $U^{23}$ | $U^{13}$ | $U^{12}$ |
|-------|----------|----------|----------|----------|----------|----------|
| C(1)  | 12(1)    | 14(1)    | 17(1)    | 5(1)     | 4(1)     | 7(1)     |
| C(2)  | 15(1)    | 13(1)    | 18(1)    | 2(1)     | 4(1)     | 4(1)     |
| C(3)  | 13(1)    | 16(1)    | 15(1)    | 4(1)     | 1(1)     | 2(1)     |
| C(4)  | 11(1)    | 16(1)    | 15(1)    | 6(1)     | 1(1)     | 5(1)     |
| C(5)  | 10(1)    | 12(1)    | 13(1)    | 6(1)     | 5(1)     | 5(1)     |
| C(6)  | 11(1)    | 12(1)    | 12(1)    | 4(1)     | 2(1)     | 6(1)     |
| C(7)  | 15(1)    | 19(1)    | 18(1)    | 5(1)     | 2(1)     | 10(1)    |
| C(8)  | 13(1)    | 14(1)    | 9(1)     | 2(1)     | 4(1)     | 5(1)     |
| C(9)  | 22(1)    | 16(1)    | 12(1)    | 4(1)     | 4(1)     | 9(1)     |
| C(10) | 29(1)    | 12(1)    | 14(1)    | 4(1)     | 10(1)    | 6(1)     |
| C(11) | 20(1)    | 16(1)    | 16(1)    | 3(1)     | 9(1)     | 2(1)     |
| C(12) | 13(1)    | 18(1)    | 12(1)    | 1(1)     | 5(1)     | 4(1)     |
| C(13) | 11(1)    | 10(1)    | 15(1)    | 3(1)     | 3(1)     | 3(1)     |
| C(14) | 12(1)    | 16(1)    | 19(1)    | 3(1)     | 3(1)     | 7(1)     |
| C(15) | 15(1)    | 23(1)    | 20(1)    | 4(1)     | 9(1)     | 7(1)     |
| C(16) | 18(1)    | 18(1)    | 13(1)    | 5(1)     | 6(1)     | 5(1)     |
| C(17) | 14(1)    | 13(1)    | 14(1)    | 5(1)     | 4(1)     | 5(1)     |
| C(18) | 17(1)    | 12(1)    | 14(1)    | 4(1)     | 3(1)     | 5(1)     |
| C(19) | 22(1)    | 18(1)    | 16(1)    | 4(1)     | 4(1)     | 7(1)     |
| C(20) | 27(1)    | 22(1)    | 12(1)    | 4(1)     | -2(1)    | 8(1)     |
| C(21) | 20(1)    | 26(1)    | 18(1)    | 4(1)     | -3(1)    | 9(1)     |
| C(22) | 17(1)    | 30(1)    | 15(1)    | 5(1)     | 0(1)     | 10(1)    |
| C(23) | 54(2)    | 39(1)    | 69(2)    | 34(1)    | 35(1)    | 38(1)    |
| C(24) | 46(1)    | 28(1)    | 33(1)    | 10(1)    | 3(1)     | 1(1)     |

|       |       |       |       |       |      |       |
|-------|-------|-------|-------|-------|------|-------|
| Cl(1) | 12(1) | 22(1) | 17(1) | 5(1)  | 4(1) | 9(1)  |
| Cl(2) | 24(1) | 24(1) | 19(1) | 6(1)  | 2(1) | 9(1)  |
| N(1)  | 9(1)  | 13(1) | 14(1) | 6(1)  | 3(1) | 4(1)  |
| N(2)  | 12(1) | 13(1) | 10(1) | 1(1)  | 4(1) | 4(1)  |
| N(3)  | 11(1) | 11(1) | 12(1) | 4(1)  | 3(1) | 4(1)  |
| N(4)  | 15(1) | 19(1) | 14(1) | 5(1)  | 3(1) | 7(1)  |
| Ni(1) | 9(1)  | 14(1) | 10(1) | 4(1)  | 2(1) | 6(1)  |
| O(1)  | 23(1) | 18(1) | 23(1) | 10(1) | 8(1) | 11(1) |
| O(2)  | 33(1) | 24(1) | 30(1) | 11(1) | 9(1) | 5(1)  |

Table 5. Hydrogen coordinates ( $\times 10^4$ ) and isotropic displacement parameters ( $\text{\AA}^2 \times 10^3$ ) for yehao004\_hartwig.

|       | x    | y     | z     | U(eq) |
|-------|------|-------|-------|-------|
| H(1A) | 3496 | 5199  | 5061  | 16    |
| H(2)  | 1925 | 4129  | 3297  | 19    |
| H(3)  | -8   | 4861  | 2793  | 19    |
| H(4)  | -259 | 6703  | 4061  | 17    |
| H(7A) | 414  | 8861  | 4845  | 25    |
| H(7B) | 316  | 9578  | 6105  | 25    |
| H(7C) | -694 | 8020  | 5538  | 25    |
| H(9)  | 2397 | 10711 | 5479  | 19    |
| H(10) | 4810 | 12355 | 5691  | 22    |
| H(11) | 6906 | 12050 | 6546  | 22    |
| H(12) | 6553 | 10063 | 7065  | 18    |
| H(14) | -505 | 8666  | 7457  | 19    |
| H(15) | -427 | 8638  | 9361  | 23    |
| H(16) | 1613 | 8383  | 10356 | 20    |
| H(19) | 3653 | 8120  | 11106 | 23    |
| H(20) | 6046 | 8210  | 11836 | 25    |
| H(21) | 7813 | 8224  | 10635 | 27    |
| H(22) | 7118 | 8120  | 8738  | 25    |



|        |          |          |          |       |
|--------|----------|----------|----------|-------|
| H(23A) | 4590     | 4562     | 6692     | 65    |
| H(23B) | 3449     | 3718     | 7364     | 65    |
| H(23C) | 4915     | 4989     | 8050     | 65    |
| H(24A) | 2892     | 4977     | 10176    | 58    |
| H(24B) | 1219     | 3988     | 10161    | 58    |
| H(24C) | 1612     | 5578     | 10414    | 58    |
| H(1)   | 2690(30) | 5340(30) | 7860(30) | 44(8) |
| H(2A)  | 960(40)  | 3850(40) | 8510(30) | 54(9) |

---

Table 6. Torsion angles [°] for yehao004\_hartwig.

|                        |             |
|------------------------|-------------|
| N(1)-C(1)-C(2)-C(3)    | -1.9(3)     |
| C(1)-C(2)-C(3)-C(4)    | 1.0(3)      |
| C(2)-C(3)-C(4)-C(5)    | 0.8(3)      |
| C(3)-C(4)-C(5)-N(1)    | -2.0(3)     |
| C(3)-C(4)-C(5)-C(6)    | 173.41(16)  |
| N(1)-C(5)-C(6)-C(7)    | 177.82(15)  |
| C(4)-C(5)-C(6)-C(7)    | 2.2(2)      |
| N(1)-C(5)-C(6)-C(13)   | -59.72(19)  |
| C(4)-C(5)-C(6)-C(13)   | 124.66(17)  |
| N(1)-C(5)-C(6)-C(8)    | 57.59(19)   |
| C(4)-C(5)-C(6)-C(8)    | -118.02(17) |
| C(7)-C(6)-C(8)-N(2)    | 177.45(14)  |
| C(13)-C(6)-C(8)-N(2)   | 58.62(18)   |
| C(5)-C(6)-C(8)-N(2)    | -62.61(18)  |
| C(7)-C(6)-C(8)-C(9)    | -3.2(2)     |
| C(13)-C(6)-C(8)-C(9)   | -122.07(17) |
| C(5)-C(6)-C(8)-C(9)    | 116.70(17)  |
| N(2)-C(8)-C(9)-C(10)   | -1.4(3)     |
| C(6)-C(8)-C(9)-C(10)   | 179.30(15)  |
| C(8)-C(9)-C(10)-C(11)  | -0.2(3)     |
| C(9)-C(10)-C(11)-C(12) | 1.9(3)      |
| C(10)-C(11)-C(12)-N(2) | -2.2(3)     |
| C(7)-C(6)-C(13)-N(3)   | -176.15(14) |

|                         |             |
|-------------------------|-------------|
| C(5)-C(6)-C(13)-N(3)    | 61.02(19)   |
| C(8)-C(6)-C(13)-N(3)    | -56.59(18)  |
| C(7)-C(6)-C(13)-C(14)   | -2.9(2)     |
| C(5)-C(6)-C(13)-C(14)   | -125.69(17) |
| C(8)-C(6)-C(13)-C(14)   | 116.70(17)  |
| N(3)-C(13)-C(14)-C(15)  | 1.0(3)      |
| C(6)-C(13)-C(14)-C(15)  | -172.07(16) |
| C(13)-C(14)-C(15)-C(16) | 3.9(3)      |
| C(14)-C(15)-C(16)-C(17) | -2.8(3)     |
| C(15)-C(16)-C(17)-N(3)  | -3.2(3)     |
| C(15)-C(16)-C(17)-C(18) | 170.48(17)  |
| N(3)-C(17)-C(18)-N(4)   | 6.3(2)      |
| C(16)-C(17)-C(18)-N(4)  | -167.80(17) |
| N(3)-C(17)-C(18)-C(19)  | -176.07(17) |
| C(16)-C(17)-C(18)-C(19) | 9.8(3)      |
| N(4)-C(18)-C(19)-C(20)  | 0.4(3)      |
| C(17)-C(18)-C(19)-C(20) | -177.02(16) |
| C(18)-C(19)-C(20)-C(21) | 0.0(3)      |
| C(19)-C(20)-C(21)-C(22) | -0.4(3)     |
| C(20)-C(21)-C(22)-N(4)  | 0.5(3)      |
| C(2)-C(1)-N(1)-C(5)     | 0.8(3)      |
| C(2)-C(1)-N(1)-Ni(1)    | -179.35(13) |
| C(4)-C(5)-N(1)-C(1)     | 1.2(2)      |
| C(6)-C(5)-N(1)-C(1)     | -174.46(15) |
| C(4)-C(5)-N(1)-Ni(1)    | -178.64(13) |
| C(6)-C(5)-N(1)-Ni(1)    | 5.7(2)      |
| C(11)-C(12)-N(2)-C(8)   | 0.7(2)      |
| C(11)-C(12)-N(2)-Ni(1)  | 177.75(13)  |
| C(9)-C(8)-N(2)-C(12)    | 1.2(2)      |
| C(6)-C(8)-N(2)-C(12)    | -179.50(15) |
| C(9)-C(8)-N(2)-Ni(1)    | -175.91(12) |
| C(6)-C(8)-N(2)-Ni(1)    | 3.40(19)    |
| C(14)-C(13)-N(3)-C(17)  | -7.0(2)     |
| C(6)-C(13)-N(3)-C(17)   | 166.53(15)  |
| C(14)-C(13)-N(3)-Ni(1)  | 178.50(12)  |
| C(6)-C(13)-N(3)-Ni(1)   | -7.96(19)   |

|                        |             |
|------------------------|-------------|
| C(16)-C(17)-N(3)-C(13) | 8.3(3)      |
| C(18)-C(17)-N(3)-C(13) | -166.05(15) |
| C(16)-C(17)-N(3)-Ni(1) | -176.95(13) |
| C(18)-C(17)-N(3)-Ni(1) | 8.74(19)    |
| C(21)-C(22)-N(4)-C(18) | -0.1(3)     |
| C(21)-C(22)-N(4)-Ni(1) | -163.07(16) |
| C(19)-C(18)-N(4)-C(22) | -0.4(3)     |
| C(17)-C(18)-N(4)-C(22) | 177.25(16)  |
| C(19)-C(18)-N(4)-Ni(1) | 164.90(14)  |
| C(17)-C(18)-N(4)-Ni(1) | -17.49(19)  |

---

Symmetry transformations used to generate equivalent atoms:

#### 13.4. Ni(Me<sub>2</sub>Phen)<sub>2</sub>(OAc)(BPh<sub>4</sub>) (**1h**)

A colorless rod 0.26 x 0.09 x 0.06 mm in size was mounted on a Cryoloop with Paratone oil. Data were collected in a nitrogen gas stream at 100(2) K using omega scans. Crystal-to-detector distance was 30.23 mm and exposure time was 1.00 seconds per frame at low angles and 2.50 seconds per frame at high angles, using a scan width of 0.5°. Data collection was 100% complete to 74.000° in  $\theta$ . A total of 63840 reflections were collected covering the indices  $-23 \leq h \leq 23$ ,  $-22 \leq k \leq 18$ ,  $-34 \leq l \leq 40$ . 11084 reflections were found to be symmetry independent, with an  $R_{\text{int}}$  of 0.0438. Indexing and unit cell refinement indicated a primitive, orthorhombic lattice. The space group was found to be  $Pbc_a$  (No. 61). The data were integrated using the CrysAlis<sup>Pro</sup> 1.171.40.50a software program and scaled using the SCALE3 ABSPACK scaling algorithm. Solution by intrinsic phasing (SHELXT-2015) produced a heavy-atom phasing model consistent with the proposed structure. All non-hydrogen atoms were refined anisotropically by full-matrix least-squares (SHELXL-2014). All hydrogen atoms were placed using a riding model. Their positions were constrained relative to their parent atom using the appropriate HFIX command in SHELXL-2014.

Table 1. Crystal data and structure refinement for Yehao002\_Hartwig.

|                     |                                                                                       |
|---------------------|---------------------------------------------------------------------------------------|
| Identification code | Yehao002_Hartwig                                                                      |
| Empirical formula   | C <sub>57.50</sub> H <sub>54</sub> B Cl <sub>7</sub> N <sub>4</sub> Ni O <sub>2</sub> |

|                                   |                                             |                       |
|-----------------------------------|---------------------------------------------|-----------------------|
| Formula weight                    | 1150.71                                     |                       |
| Temperature                       | 100(2) K                                    |                       |
| Wavelength                        | 1.54184 Å                                   |                       |
| Crystal system                    | Orthorhombic                                |                       |
| Space group                       | P b c a                                     |                       |
| Unit cell dimensions              | a = 18.9478(2) Å                            | $\alpha = 90^\circ$ . |
|                                   | b = 17.9054(2) Å                            | $\beta = 90^\circ$ .  |
|                                   | c = 32.0064(2) Å                            | $\gamma = 90^\circ$ . |
| Volume                            | 10858.75(18) Å <sup>3</sup>                 |                       |
| Z                                 | 8                                           |                       |
| Density (calculated)              | 1.408 Mg/m <sup>3</sup>                     |                       |
| Absorption coefficient            | 4.051 mm <sup>-1</sup>                      |                       |
| F(000)                            | 4760                                        |                       |
| Crystal size                      | 0.260 x 0.090 x 0.060 mm <sup>3</sup>       |                       |
| Theta range for data collection   | 3.666 to 74.502°.                           |                       |
| Index ranges                      | -23<=h<=23, -22<=k<=18, -34<=l<=40          |                       |
| Reflections collected             | 63840                                       |                       |
| Independent reflections           | 11084 [R(int) = 0.0438]                     |                       |
| Completeness to theta = 74.000°   | 99.8 %                                      |                       |
| Absorption correction             | Semi-empirical from equivalents             |                       |
| Max. and min. transmission        | 1.00000 and 0.58443                         |                       |
| Refinement method                 | Full-matrix least-squares on F <sup>2</sup> |                       |
| Data / restraints / parameters    | 11084 / 0 / 672                             |                       |
| Goodness-of-fit on F <sup>2</sup> | 1.054                                       |                       |
| Final R indices [I>2sigma(I)]     | R1 = 0.0333, wR2 = 0.0860                   |                       |
| R indices (all data)              | R1 = 0.0391, wR2 = 0.0893                   |                       |
| Extinction coefficient            | n/a                                         |                       |
| Largest diff. peak and hole       | 0.664 and -0.481 e.Å <sup>-3</sup>          |                       |

Table 2. Atomic coordinates ( x 10<sup>4</sup>) and equivalent isotropic displacement parameters (Å<sup>2</sup>x 10<sup>3</sup>) for yehao002\_hartwig. U(eq) is defined as one third of the trace of the orthogonalized U<sup>ij</sup> tensor.

|        | x       | y       | z       | U(eq) |
|--------|---------|---------|---------|-------|
| C(00M) | 1265(1) | 5683(1) | 6150(1) | 17(1) |

|        |         |         |         |       |
|--------|---------|---------|---------|-------|
| C(1)   | 3866(1) | 5270(1) | 6868(1) | 20(1) |
| C(2)   | 3698(1) | 4672(1) | 6555(1) | 16(1) |
| C(01X) | 477(1)  | 5642(1) | 6140(1) | 29(1) |
| C(3)   | 4006(1) | 3957(1) | 6599(1) | 21(1) |
| C(4)   | 3863(1) | 3406(1) | 6315(1) | 20(1) |
| C(5)   | 3429(1) | 3564(1) | 5971(1) | 16(1) |
| C(6)   | 3281(1) | 3028(1) | 5651(1) | 18(1) |
| C(7)   | 2890(1) | 3220(1) | 5313(1) | 19(1) |
| C(8)   | 2614(1) | 3959(1) | 5269(1) | 17(1) |
| C(9)   | 2222(1) | 4194(1) | 4918(1) | 21(1) |
| C(10)  | 2009(1) | 4920(1) | 4888(1) | 21(1) |
| C(11)  | 2172(1) | 5434(1) | 5211(1) | 16(1) |
| C(12)  | 1980(1) | 6237(1) | 5156(1) | 19(1) |
| C(13)  | 2735(1) | 4491(1) | 5583(1) | 14(1) |
| C(14)  | 3146(1) | 4291(1) | 5944(1) | 14(1) |
| C(15)  | 3830(1) | 6249(1) | 5424(1) | 20(1) |
| C(16)  | 3586(1) | 6843(1) | 5721(1) | 16(1) |
| C(17)  | 3796(1) | 7590(1) | 5652(1) | 19(1) |
| C(18)  | 3612(1) | 8138(1) | 5929(1) | 18(1) |
| C(19)  | 3225(1) | 7944(1) | 6289(1) | 16(1) |
| C(20)  | 3049(1) | 8477(1) | 6605(1) | 18(1) |
| C(21)  | 2694(1) | 8266(1) | 6952(1) | 19(1) |
| C(22)  | 2484(1) | 7506(1) | 7012(1) | 16(1) |
| C(23)  | 2139(1) | 7253(1) | 7374(1) | 19(1) |
| C(24)  | 1988(1) | 6514(1) | 7418(1) | 18(1) |
| C(25)  | 2168(1) | 6004(1) | 7096(1) | 16(1) |
| C(26)  | 2017(1) | 5190(1) | 7157(1) | 21(1) |
| C(27)  | 2640(1) | 6969(1) | 6703(1) | 14(1) |
| C(28)  | 3017(1) | 7193(1) | 6333(1) | 14(1) |
| C(29)  | 6047(1) | 6997(1) | 6207(1) | 17(1) |
| C(30)  | 5388(1) | 6664(1) | 6136(1) | 22(1) |
| C(31)  | 5236(1) | 5928(1) | 6243(1) | 27(1) |
| C(32)  | 5751(1) | 5487(1) | 6432(1) | 25(1) |
| C(33)  | 6403(1) | 5799(1) | 6517(1) | 23(1) |
| C(34)  | 6546(1) | 6541(1) | 6408(1) | 20(1) |
| C(35)  | 7010(1) | 8070(1) | 5970(1) | 17(1) |

|       |         |         |         |       |
|-------|---------|---------|---------|-------|
| C(36) | 7470(1) | 7548(1) | 5788(1) | 20(1) |
| C(37) | 8151(1) | 7729(1) | 5660(1) | 24(1) |
| C(38) | 8406(1) | 8451(1) | 5712(1) | 26(1) |
| C(39) | 7965(1) | 8988(1) | 5885(1) | 25(1) |
| C(40) | 7286(1) | 8796(1) | 6009(1) | 21(1) |
| C(41) | 5916(1) | 8345(1) | 6502(1) | 18(1) |
| C(42) | 6367(1) | 8541(1) | 6831(1) | 20(1) |
| C(43) | 6126(1) | 8885(1) | 7197(1) | 22(1) |
| C(44) | 5414(1) | 9046(1) | 7246(1) | 23(1) |
| C(45) | 4949(1) | 8853(1) | 6929(1) | 24(1) |
| C(46) | 5198(1) | 8506(1) | 6568(1) | 22(1) |
| C(47) | 5732(1) | 8105(1) | 5664(1) | 18(1) |
| C(48) | 5426(1) | 8812(1) | 5603(1) | 22(1) |
| C(49) | 5052(1) | 9000(1) | 5243(1) | 27(1) |
| C(50) | 4980(1) | 8485(1) | 4921(1) | 27(1) |
| C(51) | 5295(1) | 7786(1) | 4963(1) | 24(1) |
| C(52) | 5660(1) | 7608(1) | 5326(1) | 20(1) |
| C(53) | 3846(1) | 5555(1) | 8380(1) | 27(1) |
| C(54) | 6420(1) | 2884(1) | 6779(1) | 31(1) |
| C(55) | 5107(1) | 6903(1) | 7280(1) | 29(1) |
| C(56) | 5539(3) | 5158(2) | 5264(1) | 40(1) |
| B(1)  | 6184(1) | 7880(1) | 6087(1) | 17(1) |
| Cl(1) | 3580(1) | 5817(1) | 8888(1) | 35(1) |
| Cl(2) | 3217(1) | 5820(1) | 8003(1) | 33(1) |
| Cl(3) | 5557(1) | 2617(1) | 6635(1) | 46(1) |
| Cl(4) | 6432(1) | 3756(1) | 7035(1) | 46(1) |
| Cl(5) | 5212(1) | 6105(1) | 7606(1) | 33(1) |
| Cl(6) | 4205(1) | 7125(1) | 7216(1) | 29(1) |
| Cl(7) | 4881(1) | 4498(1) | 5393(1) | 46(1) |
| Cl(8) | 4614(1) | 4412(1) | 5220(1) | 42(1) |
| N(1)  | 3263(1) | 4828(1) | 6240(1) | 14(1) |
| N(2)  | 2510(1) | 5216(1) | 5555(1) | 14(1) |
| N(3)  | 3186(1) | 6653(1) | 6047(1) | 14(1) |
| N(4)  | 2475(1) | 6231(1) | 6744(1) | 14(1) |
| Ni(1) | 2558(1) | 5719(1) | 6149(1) | 13(1) |
| O(1)  | 1579(1) | 6284(1) | 6056(1) | 17(1) |

---

|      |         |         |         |       |
|------|---------|---------|---------|-------|
| O(2) | 1621(1) | 5106(1) | 6249(1) | 17(1) |
|------|---------|---------|---------|-------|

---

Table 3. Bond lengths [Å] and angles [°] for yehao002\_hartwig.

---

|               |            |
|---------------|------------|
| C(00M)-O(1)   | 1.267(2)   |
| C(00M)-O(2)   | 1.2720(19) |
| C(00M)-C(01X) | 1.494(2)   |
| C(00M)-Ni(1)  | 2.4513(17) |
| C(1)-C(2)     | 1.501(2)   |
| C(2)-N(1)     | 1.333(2)   |
| C(2)-C(3)     | 1.413(2)   |
| C(3)-C(4)     | 1.368(2)   |
| C(4)-C(5)     | 1.405(2)   |
| C(5)-C(14)    | 1.410(2)   |
| C(5)-C(6)     | 1.431(2)   |
| C(6)-C(7)     | 1.355(2)   |
| C(7)-C(8)     | 1.431(2)   |
| C(8)-C(13)    | 1.403(2)   |
| C(8)-C(9)     | 1.411(2)   |
| C(9)-C(10)    | 1.365(2)   |
| C(10)-C(11)   | 1.418(2)   |
| C(11)-N(2)    | 1.331(2)   |
| C(11)-C(12)   | 1.494(2)   |
| C(13)-N(2)    | 1.3695(19) |
| C(13)-C(14)   | 1.436(2)   |
| C(14)-N(1)    | 1.3702(19) |
| C(15)-C(16)   | 1.499(2)   |
| C(16)-N(3)    | 1.334(2)   |
| C(16)-C(17)   | 1.412(2)   |
| C(17)-C(18)   | 1.368(2)   |
| C(18)-C(19)   | 1.408(2)   |
| C(19)-C(28)   | 1.408(2)   |
| C(19)-C(20)   | 1.429(2)   |
| C(20)-C(21)   | 1.352(2)   |

|             |          |
|-------------|----------|
| C(21)-C(22) | 1.431(2) |
| C(22)-C(23) | 1.405(2) |
| C(22)-C(27) | 1.411(2) |
| C(23)-C(24) | 1.361(2) |
| C(24)-C(25) | 1.418(2) |
| C(25)-N(4)  | 1.330(2) |
| C(25)-C(26) | 1.498(2) |
| C(27)-N(4)  | 1.366(2) |
| C(27)-C(28) | 1.438(2) |
| C(28)-N(3)  | 1.370(2) |
| C(29)-C(30) | 1.404(2) |
| C(29)-C(34) | 1.404(2) |
| C(29)-B(1)  | 1.647(2) |
| C(30)-C(31) | 1.392(2) |
| C(31)-C(32) | 1.393(3) |
| C(32)-C(33) | 1.383(3) |
| C(33)-C(34) | 1.400(2) |
| C(35)-C(36) | 1.405(2) |
| C(35)-C(40) | 1.405(2) |
| C(35)-B(1)  | 1.645(2) |
| C(36)-C(37) | 1.392(2) |
| C(37)-C(38) | 1.391(3) |
| C(38)-C(39) | 1.389(3) |
| C(39)-C(40) | 1.392(3) |
| C(41)-C(42) | 1.401(2) |
| C(41)-C(46) | 1.407(2) |
| C(41)-B(1)  | 1.648(2) |
| C(42)-C(43) | 1.402(2) |
| C(43)-C(44) | 1.388(3) |
| C(44)-C(45) | 1.388(3) |
| C(45)-C(46) | 1.393(2) |
| C(47)-C(48) | 1.406(2) |
| C(47)-C(52) | 1.406(2) |
| C(47)-B(1)  | 1.651(2) |
| C(48)-C(49) | 1.395(3) |
| C(49)-C(50) | 1.389(3) |



|                     |            |
|---------------------|------------|
| C(50)-C(51)         | 1.392(3)   |
| C(51)-C(52)         | 1.390(2)   |
| C(53)-Cl(2)         | 1.7625(19) |
| C(53)-Cl(1)         | 1.7644(18) |
| C(54)-Cl(4)         | 1.763(2)   |
| C(54)-Cl(3)         | 1.766(2)   |
| C(55)-Cl(6)         | 1.7669(19) |
| C(55)-Cl(5)         | 1.7795(19) |
| C(56)-Cl(8)#1       | 1.753(5)   |
| C(56)-Cl(7)         | 1.766(5)   |
| Cl(7)-Cl(8)         | 0.7680(16) |
| Cl(8)-C(56)#1       | 1.753(5)   |
| N(1)-Ni(1)          | 2.0999(13) |
| N(2)-Ni(1)          | 2.1057(13) |
| N(3)-Ni(1)          | 2.0789(13) |
| N(4)-Ni(1)          | 2.1196(13) |
| Ni(1)-O(2)          | 2.1111(11) |
| Ni(1)-O(1)          | 2.1339(11) |
| O(1)-C(00M)-O(2)    | 119.92(15) |
| O(1)-C(00M)-C(01X)  | 120.41(14) |
| O(2)-C(00M)-C(01X)  | 119.67(15) |
| O(1)-C(00M)-Ni(1)   | 60.48(8)   |
| O(2)-C(00M)-Ni(1)   | 59.45(8)   |
| C(01X)-C(00M)-Ni(1) | 178.17(13) |
| N(1)-C(2)-C(3)      | 121.39(14) |
| N(1)-C(2)-C(1)      | 119.07(14) |
| C(3)-C(2)-C(1)      | 119.53(14) |
| C(4)-C(3)-C(2)      | 120.38(15) |
| C(3)-C(4)-C(5)      | 119.45(15) |
| C(4)-C(5)-C(14)     | 117.21(14) |
| C(4)-C(5)-C(6)      | 122.73(14) |
| C(14)-C(5)-C(6)     | 120.06(14) |
| C(7)-C(6)-C(5)      | 120.51(14) |
| C(6)-C(7)-C(8)      | 120.81(14) |
| C(13)-C(8)-C(9)     | 117.02(14) |

|                   |            |
|-------------------|------------|
| C(13)-C(8)-C(7)   | 119.89(14) |
| C(9)-C(8)-C(7)    | 123.09(14) |
| C(10)-C(9)-C(8)   | 119.72(15) |
| C(9)-C(10)-C(11)  | 120.11(15) |
| N(2)-C(11)-C(10)  | 121.21(14) |
| N(2)-C(11)-C(12)  | 119.82(14) |
| C(10)-C(11)-C(12) | 118.94(14) |
| N(2)-C(13)-C(8)   | 123.03(14) |
| N(2)-C(13)-C(14)  | 117.31(13) |
| C(8)-C(13)-C(14)  | 119.58(14) |
| N(1)-C(14)-C(5)   | 122.95(14) |
| N(1)-C(14)-C(13)  | 117.92(13) |
| C(5)-C(14)-C(13)  | 119.10(14) |
| N(3)-C(16)-C(17)  | 121.61(14) |
| N(3)-C(16)-C(15)  | 119.36(14) |
| C(17)-C(16)-C(15) | 119.01(14) |
| C(18)-C(17)-C(16) | 120.37(15) |
| C(17)-C(18)-C(19) | 119.12(14) |
| C(28)-C(19)-C(18) | 117.54(14) |
| C(28)-C(19)-C(20) | 120.06(14) |
| C(18)-C(19)-C(20) | 122.40(14) |
| C(21)-C(20)-C(19) | 120.74(14) |
| C(20)-C(21)-C(22) | 120.96(14) |
| C(23)-C(22)-C(27) | 117.16(14) |
| C(23)-C(22)-C(21) | 123.19(14) |
| C(27)-C(22)-C(21) | 119.63(14) |
| C(24)-C(23)-C(22) | 119.73(14) |
| C(23)-C(24)-C(25) | 120.05(14) |
| N(4)-C(25)-C(24)  | 121.56(14) |
| N(4)-C(25)-C(26)  | 119.37(14) |
| C(24)-C(25)-C(26) | 119.06(14) |
| N(4)-C(27)-C(22)  | 122.86(14) |
| N(4)-C(27)-C(28)  | 117.65(13) |
| C(22)-C(27)-C(28) | 119.43(14) |
| N(3)-C(28)-C(19)  | 122.83(14) |
| N(3)-C(28)-C(27)  | 117.94(13) |

|                   |            |
|-------------------|------------|
| C(19)-C(28)-C(27) | 119.17(14) |
| C(30)-C(29)-C(34) | 115.21(15) |
| C(30)-C(29)-B(1)  | 120.69(14) |
| C(34)-C(29)-B(1)  | 123.96(15) |
| C(31)-C(30)-C(29) | 123.11(16) |
| C(30)-C(31)-C(32) | 119.97(17) |
| C(33)-C(32)-C(31) | 118.74(16) |
| C(32)-C(33)-C(34) | 120.54(16) |
| C(33)-C(34)-C(29) | 122.39(16) |
| C(36)-C(35)-C(40) | 114.97(15) |
| C(36)-C(35)-B(1)  | 123.10(14) |
| C(40)-C(35)-B(1)  | 121.66(14) |
| C(37)-C(36)-C(35) | 122.85(16) |
| C(38)-C(37)-C(36) | 120.21(16) |
| C(39)-C(38)-C(37) | 118.82(16) |
| C(38)-C(39)-C(40) | 120.00(16) |
| C(39)-C(40)-C(35) | 123.14(16) |
| C(42)-C(41)-C(46) | 115.13(15) |
| C(42)-C(41)-B(1)  | 122.96(14) |
| C(46)-C(41)-B(1)  | 121.62(14) |
| C(41)-C(42)-C(43) | 122.71(16) |
| C(44)-C(43)-C(42) | 120.15(16) |
| C(45)-C(44)-C(43) | 118.85(15) |
| C(44)-C(45)-C(46) | 120.16(16) |
| C(45)-C(46)-C(41) | 122.97(16) |
| C(48)-C(47)-C(52) | 115.06(15) |
| C(48)-C(47)-B(1)  | 123.13(14) |
| C(52)-C(47)-B(1)  | 121.72(14) |
| C(49)-C(48)-C(47) | 122.72(16) |
| C(50)-C(49)-C(48) | 120.21(17) |
| C(49)-C(50)-C(51) | 118.88(16) |
| C(52)-C(51)-C(50) | 119.98(16) |
| C(51)-C(52)-C(47) | 123.09(16) |
| Cl(2)-C(53)-Cl(1) | 111.49(10) |
| Cl(4)-C(54)-Cl(3) | 111.88(11) |
| Cl(6)-C(55)-Cl(5) | 110.91(10) |

|                     |            |
|---------------------|------------|
| Cl(8)#1-C(56)-Cl(7) | 112.6(3)   |
| C(35)-B(1)-C(29)    | 113.68(13) |
| C(35)-B(1)-C(41)    | 111.81(13) |
| C(29)-B(1)-C(41)    | 104.35(12) |
| C(35)-B(1)-C(47)    | 104.91(12) |
| C(29)-B(1)-C(47)    | 110.10(13) |
| C(41)-B(1)-C(47)    | 112.18(13) |
| Cl(8)-Cl(7)-C(56)   | 115.6(3)   |
| Cl(7)-Cl(8)-C(56)#1 | 131.2(3)   |
| C(2)-N(1)-C(14)     | 118.48(13) |
| C(2)-N(1)-Ni(1)     | 131.15(10) |
| C(14)-N(1)-Ni(1)    | 109.52(10) |
| C(11)-N(2)-C(13)    | 118.79(13) |
| C(11)-N(2)-Ni(1)    | 129.98(11) |
| C(13)-N(2)-Ni(1)    | 109.37(10) |
| C(16)-N(3)-C(28)    | 118.36(13) |
| C(16)-N(3)-Ni(1)    | 130.82(11) |
| C(28)-N(3)-Ni(1)    | 109.26(10) |
| C(25)-N(4)-C(27)    | 118.59(13) |
| C(25)-N(4)-Ni(1)    | 131.34(11) |
| C(27)-N(4)-Ni(1)    | 108.32(9)  |
| N(3)-Ni(1)-N(1)     | 105.57(5)  |
| N(3)-Ni(1)-N(2)     | 103.08(5)  |
| N(1)-Ni(1)-N(2)     | 80.12(5)   |
| N(3)-Ni(1)-O(2)     | 157.37(5)  |
| N(1)-Ni(1)-O(2)     | 96.92(5)   |
| N(2)-Ni(1)-O(2)     | 83.02(5)   |
| N(3)-Ni(1)-N(4)     | 80.54(5)   |
| N(1)-Ni(1)-N(4)     | 104.56(5)  |
| N(2)-Ni(1)-N(4)     | 173.25(5)  |
| O(2)-Ni(1)-N(4)     | 91.51(5)   |
| N(3)-Ni(1)-O(1)     | 95.39(5)   |
| N(1)-Ni(1)-O(1)     | 158.80(5)  |
| N(2)-Ni(1)-O(1)     | 92.21(5)   |
| O(2)-Ni(1)-O(1)     | 62.35(4)   |
| N(4)-Ni(1)-O(1)     | 81.71(5)   |

|                   |           |
|-------------------|-----------|
| N(3)-Ni(1)-C(00M) | 126.41(5) |
| N(1)-Ni(1)-C(00M) | 128.02(5) |
| N(2)-Ni(1)-C(00M) | 86.95(5)  |
| O(2)-Ni(1)-C(00M) | 31.26(5)  |
| N(4)-Ni(1)-C(00M) | 86.32(5)  |
| O(1)-Ni(1)-C(00M) | 31.10(5)  |
| C(00M)-O(1)-Ni(1) | 88.42(9)  |
| C(00M)-O(2)-Ni(1) | 89.30(9)  |

---

Symmetry transformations used to generate equivalent atoms:

#1 -x+1,-y+1,-z+1

Table 4. Anisotropic displacement parameters ( $\text{\AA}^2 \times 10^3$ ) for yehao002\_hartwig. The anisotropic displacement factor exponent takes the form:  $-2\pi^2 [ h^2 a^{*2} U^{11} + \dots + 2 h k a^* b^* U^{12} ]$

|        | U <sup>11</sup> | U <sup>22</sup> | U <sup>33</sup> | U <sup>23</sup> | U <sup>13</sup> | U <sup>12</sup> |
|--------|-----------------|-----------------|-----------------|-----------------|-----------------|-----------------|
| C(00M) | 21(1)           | 16(1)           | 14(1)           | 0(1)            | 0(1)            | 1(1)            |
| C(1)   | 23(1)           | 19(1)           | 17(1)           | -2(1)           | -5(1)           | 2(1)            |
| C(2)   | 17(1)           | 18(1)           | 15(1)           | 1(1)            | 0(1)            | 1(1)            |
| C(01X) | 19(1)           | 29(1)           | 38(1)           | 7(1)            | 0(1)            | 1(1)            |
| C(3)   | 23(1)           | 21(1)           | 17(1)           | 1(1)            | -4(1)           | 4(1)            |
| C(4)   | 23(1)           | 16(1)           | 22(1)           | 3(1)            | 0(1)            | 5(1)            |
| C(5)   | 18(1)           | 14(1)           | 16(1)           | 0(1)            | 2(1)            | 1(1)            |
| C(6)   | 22(1)           | 13(1)           | 20(1)           | 0(1)            | 3(1)            | 2(1)            |
| C(7)   | 26(1)           | 13(1)           | 18(1)           | -4(1)           | 2(1)            | -1(1)           |
| C(8)   | 21(1)           | 14(1)           | 16(1)           | -1(1)           | 2(1)            | -1(1)           |
| C(9)   | 30(1)           | 18(1)           | 16(1)           | -5(1)           | -3(1)           | -1(1)           |
| C(10)  | 28(1)           | 19(1)           | 15(1)           | -1(1)           | -5(1)           | 2(1)            |
| C(11)  | 19(1)           | 16(1)           | 14(1)           | 0(1)            | -1(1)           | 0(1)            |
| C(12)  | 25(1)           | 16(1)           | 16(1)           | 1(1)            | -1(1)           | 3(1)            |
| C(13)  | 17(1)           | 12(1)           | 14(1)           | -1(1)           | 2(1)            | 0(1)            |
| C(14)  | 16(1)           | 13(1)           | 14(1)           | 0(1)            | 3(1)            | -1(1)           |
| C(15)  | 20(1)           | 21(1)           | 18(1)           | -2(1)           | 4(1)            | 1(1)            |
| C(16)  | 15(1)           | 19(1)           | 14(1)           | 1(1)            | -2(1)           | 1(1)            |

|       |       |       |       |       |       |       |
|-------|-------|-------|-------|-------|-------|-------|
| C(17) | 17(1) | 20(1) | 19(1) | 4(1)  | 2(1)  | -1(1) |
| C(18) | 17(1) | 15(1) | 22(1) | 4(1)  | -1(1) | -2(1) |
| C(19) | 16(1) | 14(1) | 17(1) | 2(1)  | -3(1) | 0(1)  |
| C(20) | 21(1) | 11(1) | 23(1) | -1(1) | -3(1) | 0(1)  |
| C(21) | 22(1) | 14(1) | 20(1) | -4(1) | -2(1) | 2(1)  |
| C(22) | 19(1) | 14(1) | 17(1) | -2(1) | -1(1) | 2(1)  |
| C(23) | 22(1) | 19(1) | 15(1) | -4(1) | 1(1)  | 3(1)  |
| C(24) | 22(1) | 19(1) | 13(1) | 0(1)  | 2(1)  | 0(1)  |
| C(25) | 18(1) | 17(1) | 14(1) | 0(1)  | 0(1)  | 0(1)  |
| C(26) | 31(1) | 16(1) | 15(1) | 1(1)  | 2(1)  | -4(1) |
| C(27) | 16(1) | 13(1) | 14(1) | -1(1) | -2(1) | 1(1)  |
| C(28) | 15(1) | 13(1) | 15(1) | -1(1) | -2(1) | 0(1)  |
| C(29) | 20(1) | 18(1) | 13(1) | -1(1) | 2(1)  | 1(1)  |
| C(30) | 22(1) | 24(1) | 21(1) | 5(1)  | -1(1) | 0(1)  |
| C(31) | 26(1) | 28(1) | 26(1) | 6(1)  | -3(1) | -7(1) |
| C(32) | 34(1) | 18(1) | 24(1) | 4(1)  | 0(1)  | -3(1) |
| C(33) | 28(1) | 21(1) | 21(1) | 2(1)  | -1(1) | 4(1)  |
| C(34) | 22(1) | 21(1) | 17(1) | 0(1)  | -1(1) | 0(1)  |
| C(35) | 21(1) | 18(1) | 13(1) | 2(1)  | -1(1) | 0(1)  |
| C(36) | 24(1) | 20(1) | 17(1) | -1(1) | 1(1)  | 0(1)  |
| C(37) | 25(1) | 26(1) | 21(1) | -1(1) | 3(1)  | 2(1)  |
| C(38) | 22(1) | 35(1) | 20(1) | 3(1)  | 2(1)  | -6(1) |
| C(39) | 32(1) | 23(1) | 20(1) | 1(1)  | -1(1) | -8(1) |
| C(40) | 27(1) | 19(1) | 18(1) | -1(1) | 1(1)  | 0(1)  |
| C(41) | 23(1) | 15(1) | 15(1) | 3(1)  | 1(1)  | 0(1)  |
| C(42) | 23(1) | 19(1) | 17(1) | 3(1)  | 0(1)  | 2(1)  |
| C(43) | 30(1) | 21(1) | 16(1) | 0(1)  | -5(1) | 1(1)  |
| C(44) | 32(1) | 22(1) | 16(1) | -2(1) | 2(1)  | 5(1)  |
| C(45) | 23(1) | 27(1) | 23(1) | -2(1) | 2(1)  | 3(1)  |
| C(46) | 23(1) | 24(1) | 18(1) | -2(1) | -1(1) | -1(1) |
| C(47) | 18(1) | 19(1) | 16(1) | 3(1)  | 3(1)  | -2(1) |
| C(48) | 26(1) | 19(1) | 22(1) | 3(1)  | 2(1)  | -1(1) |
| C(49) | 26(1) | 26(1) | 29(1) | 12(1) | 2(1)  | 1(1)  |
| C(50) | 23(1) | 40(1) | 19(1) | 12(1) | 0(1)  | -4(1) |
| C(51) | 22(1) | 35(1) | 16(1) | 1(1)  | 3(1)  | -7(1) |
| C(52) | 20(1) | 24(1) | 17(1) | 2(1)  | 4(1)  | -1(1) |

|       |       |       |       |       |       |       |
|-------|-------|-------|-------|-------|-------|-------|
| C(53) | 28(1) | 33(1) | 21(1) | -3(1) | 0(1)  | 6(1)  |
| C(54) | 30(1) | 33(1) | 29(1) | 2(1)  | -1(1) | 4(1)  |
| C(55) | 26(1) | 31(1) | 30(1) | 5(1)  | 1(1)  | -3(1) |
| C(56) | 48(3) | 35(2) | 37(2) | -4(2) | 11(2) | 6(2)  |
| B(1)  | 20(1) | 17(1) | 16(1) | 0(1)  | 0(1)  | 0(1)  |
| Cl(1) | 44(1) | 40(1) | 22(1) | -4(1) | 7(1)  | 1(1)  |
| Cl(2) | 28(1) | 44(1) | 28(1) | 0(1)  | -5(1) | 4(1)  |
| Cl(3) | 32(1) | 57(1) | 50(1) | -3(1) | -5(1) | 1(1)  |
| Cl(4) | 69(1) | 36(1) | 33(1) | -1(1) | -2(1) | 0(1)  |
| Cl(5) | 27(1) | 39(1) | 32(1) | 10(1) | 0(1)  | 2(1)  |
| Cl(6) | 27(1) | 27(1) | 32(1) | 0(1)  | -4(1) | 0(1)  |
| Cl(7) | 44(1) | 31(1) | 62(1) | 7(1)  | 21(1) | 9(1)  |
| Cl(8) | 48(1) | 32(1) | 45(1) | 5(1)  | 21(1) | 10(1) |
| N(1)  | 17(1) | 12(1) | 13(1) | 0(1)  | 1(1)  | 0(1)  |
| N(2)  | 17(1) | 12(1) | 14(1) | 0(1)  | 0(1)  | 1(1)  |
| N(3)  | 16(1) | 14(1) | 14(1) | 0(1)  | -1(1) | 1(1)  |
| N(4)  | 17(1) | 13(1) | 12(1) | -1(1) | 0(1)  | 0(1)  |
| Ni(1) | 17(1) | 10(1) | 12(1) | 0(1)  | 0(1)  | 1(1)  |
| O(1)  | 20(1) | 13(1) | 17(1) | 1(1)  | 1(1)  | 1(1)  |
| O(2)  | 20(1) | 14(1) | 17(1) | 1(1)  | 0(1)  | -1(1) |

Table 5. Hydrogen coordinates ( $\times 10^4$ ) and isotropic displacement parameters ( $\text{\AA}^2 \times 10^3$ ) for yehao002\_hartwig.

|        | x    | y    | z    | U(eq) |
|--------|------|------|------|-------|
| H(1A)  | 3768 | 5761 | 6746 | 30    |
| H(1B)  | 4366 | 5240 | 6945 | 30    |
| H(1C)  | 3574 | 5201 | 7118 | 30    |
| H(01A) | 321  | 5490 | 5861 | 43    |
| H(01B) | 279  | 6133 | 6208 | 43    |
| H(01C) | 314  | 5275 | 6346 | 43    |
| H(3)   | 4315 | 3859 | 6827 | 25    |

|        |      |      |      |    |
|--------|------|------|------|----|
| H(4)   | 4056 | 2920 | 6351 | 24 |
| H(6)   | 3459 | 2534 | 5676 | 22 |
| H(7)   | 2798 | 2858 | 5103 | 23 |
| H(9)   | 2106 | 3848 | 4704 | 25 |
| H(10)  | 1751 | 5082 | 4650 | 25 |
| H(12A) | 1466 | 6292 | 5172 | 29 |
| H(12B) | 2146 | 6410 | 4882 | 29 |
| H(12C) | 2201 | 6535 | 5376 | 29 |
| H(15A) | 3815 | 5762 | 5564 | 30 |
| H(15B) | 4315 | 6356 | 5336 | 30 |
| H(15C) | 3521 | 6241 | 5179 | 30 |
| H(17)  | 4068 | 7712 | 5412 | 22 |
| H(18)  | 3742 | 8642 | 5879 | 21 |
| H(20)  | 3183 | 8984 | 6571 | 22 |
| H(21)  | 2583 | 8628 | 7158 | 22 |
| H(23)  | 2013 | 7596 | 7588 | 22 |
| H(24)  | 1762 | 6339 | 7664 | 22 |
| H(26A) | 1513 | 5097 | 7115 | 31 |
| H(26B) | 2151 | 5043 | 7441 | 31 |
| H(26C) | 2290 | 4898 | 6954 | 31 |
| H(30)  | 5027 | 6955 | 6009 | 27 |
| H(31)  | 4783 | 5726 | 6187 | 32 |
| H(32)  | 5656 | 4981 | 6503 | 30 |
| H(33)  | 6757 | 5508 | 6649 | 27 |
| H(34)  | 6996 | 6744 | 6472 | 24 |
| H(36)  | 7309 | 7050 | 5751 | 24 |
| H(37)  | 8443 | 7357 | 5537 | 29 |
| H(38)  | 8874 | 8576 | 5630 | 31 |
| H(39)  | 8128 | 9487 | 5918 | 30 |
| H(40)  | 6994 | 9173 | 6127 | 26 |
| H(42)  | 6857 | 8437 | 6804 | 24 |
| H(43)  | 6451 | 9007 | 7413 | 27 |
| H(44)  | 5248 | 9285 | 7492 | 28 |
| H(45)  | 4460 | 8956 | 6959 | 29 |
| H(46)  | 4868 | 8373 | 6358 | 26 |
| H(48)  | 5477 | 9177 | 5817 | 27 |



|        |      |      |      |    |
|--------|------|------|------|----|
| H(49)  | 4845 | 9481 | 5218 | 32 |
| H(50)  | 4720 | 8607 | 4677 | 33 |
| H(51)  | 5260 | 7431 | 4743 | 29 |
| H(52)  | 5871 | 7128 | 5347 | 24 |
| H(53A) | 4304 | 5794 | 8315 | 33 |
| H(53B) | 3912 | 5007 | 8370 | 33 |
| H(54A) | 6622 | 2500 | 6967 | 37 |
| H(54B) | 6720 | 2911 | 6527 | 37 |
| H(55A) | 5356 | 7334 | 7407 | 35 |
| H(55B) | 5322 | 6804 | 7004 | 35 |
| H(56A) | 5557 | 5546 | 5484 | 48 |
| H(56B) | 6003 | 4905 | 5257 | 48 |

---
